# Supplementary material
Source: Research Square preprint supplement (doi:10.21203/rs.3.rs-7712660/v2)
Supplement: Supplementary file 1 [file 7b5dbf89cd9cb0f8ada51a62.xlsx]

## Sheet: Menú
					Promotor:	MIKROBIOMIK
					Protocolo:	ICD-01
					Título:	Ensayo clínico fase III aleatorizado, controlado y abierto en pacientes con infección primaria o recurrente por Clostridioides difficile (CD) para evaluar la eficacia y la seguridad de cápsulas de microbiota fecal liofilizada vs fidaxomicina.
								Menú Principal:
						Visitas:		Otros apartados del CRD:				Informes:
												CRDs

## Sheet: Visita Basal
Centro	Nº de Paciente	Fecha de la visita	¿Ha firmado el/la paciente el Consentimiento Informado correspondiente?	No, especificar	Fecha de obtención del consentimiento informado	¿Se ha entregado copia del Consentimiento Informado al paciente?	No, especificar	Grupo Aleatorización	¿Está el/la paciente tomando antibiótico en el momento de ser incluido en el estudio?	Sí, Indicar antibiótico	Indicar motivo de la toma de antibiótico	Fecha de inicio del tto con antibiótico	Fecha de fin del tto con antibiótico	¿Se ha realizado un periodo de lavado de 24 horas?	No, especificar	Edad	Sexo	Origen étnico/Raza	Otra, por favor especificar	1. Pacientes de ambos sexos, mayores de 18 años.	2. Pacientes que presenten un episodio de infección por CD (ya sea el primer episodio o posteriores recurrencias).	3. Presencia de episodio de diarrea definido como ≥3 deposiciones / 24 horas, al comienzo del episodio.	4. Confirmación de la presencia de la toxina A y/o B de CD en heces, mediante una prueba de detección directa de toxinas o mediante PCR para la detección de los genes productores de la/s toxina/s, al comienzo del episodio que va a ser tratado en el ensayo clínico (la prueba de toxina debe ser positiva dentro de los 7 días previos a la inclusión del paciente en el ensayo).	1. Transferencia de microbiota fecal previa.	2. Pacientes trasplantados, salvo aquellos con trasplante de órgano sólido de más de 2 años, con buena función del órgano.	3. Recuento absoluto de neutrófilos < 500 células /µL en el momento de la inclusión en el estudio.	4. Embarazo, lactancia o intención de quedarse embarazada durante el tiempo de transcurso del estudio.	5. Tratamiento activo con secuestradores de ácidos biliares (por ejemplo: colestiramina).	6. Pacientes positivos para el virus de inmunodeficiencia humana (VIH) salvo aquellos con recuento de linfocitos T CD4 > 200 células/µL y carga viral inferior a 20 copias.	7. Disfunción al tragar o no coordinación oral-motora.	8. Paciente ingresado en UCI, o que se espera que sea admitido en UCI, por enfermedad grave.	9. Antecedentes de condiciones médicas significativas que, en opinión del investigador, no permitirían una adecuada valoración o seguimiento del paciente.	¿El paciente inicia el ensayo con episodio primario de infección por CD?	¿El paciente inicia el ensayo con episodio recurrente de infección por CD?	Sí, Número de recurrencias previas	¿Está tomando o ha tomado el paciente tratamiento con inhibidor de bomba de protones?	Fecha de inicio	Fecha de fin	Continúa	Peso	Peso. ND	Talla	Talla. ND	IMC (masa/estatura²)	Tensión Arterial. Sistólica	ND	Tensión Arterial. Diastólica	ND	Temperatura
01	01-1	29/10/2021	Sí		29/10/2021	Sí		Grupo experimental (MBK-01)	No							88	Hombre	Caucásico		Sí	Sí	Sí	Sí	No	No	No	NA	No	No	No	No	No	No	Sí	1	Sí	ND/ND/ND		Si	56	0		1		119	0	72	0	36.5
01	01-2	07/03/2022	Sí		06/03/2022	Sí		Grupo experimental (MBK-01)	Sí	vancomicina	CDI	01/03/2022	06/03/2022	Sí		75	Hombre	Caucásico		Sí	Sí	Sí	Sí	No	No	No	NA	No	No	No	No	No	No	Sí	1	No				68.9	0	170	0	23.84	149	0	72	0	36.3
01	01-3	08/07/2022	Sí		08/07/2022	Sí		Grupo experimental (MBK-01)	Sí	VANCOMICINA	CDI	04/07/2022	07/07/2022	Sí		49	Mujer	Caucásico		Sí	Sí	Sí	Sí	No	No	No	No	No	No	No	No	No	No	Sí	1	Sí	ND/01/2018		Si	55.5	0	162	0	21.15	136	0	79	0	36.4
01	01-4	13/10/2022	Sí		12/10/2022	Sí		Grupo control (Fidaxomicina)	Sí	vancomicina	ICD	07/10/2022	11/10/2022	Sí		61	Mujer	Caucásico		Sí	Sí	Sí	Sí	No	No	No	No	No	No	No	No	No	No	Sí	1	No				66.5	0	168	0	23.56	146	0	77	0	36.4
01	01-5	22/02/2023	Sí		21/02/2023	Sí		Grupo control (Fidaxomicina)	Sí	vancomicina	ICD	16/02/2023	20/02/2023	Sí		43	Mujer	Caucásico		Sí	Sí	Sí	Sí	No	No	No	No	No	No	No	No	No	Sí	No		No				75	0	168	0	26.57	118	0	59	0	36.3
01	01-6	27/02/2023	Sí		26/02/2023	Sí		Grupo experimental (MBK-01)	Sí	vancomicina	CDI	21/02/2023	25/02/2023	Sí		62	Mujer	Caucásico		Sí	Sí	Sí	Sí	No	No	No	NA	No	No	No	No	No	Sí	No		No				53.5	0	163	0	20.14	137	0	64	0	36.4
01	01-7	31/05/2023	Sí		31/05/2023	Sí		Grupo control (Fidaxomicina)	Sí	vancomicina	CDI	26/05/2023	30/05/2023	Sí		76	Mujer	Caucásico		Sí	Sí	Sí	Sí	No	No	No	NA	No	No	No	No	No	No	Sí	1	Sí	23/12/2022	31/05/2023	No	66	0	158	0	26.44	124	0	93	0	36.3
01	01-8	04/09/2023	Sí		04/09/2023	Sí		Grupo control (Fidaxomicina)	Sí	vancomicina	CDI	30/08/2023	03/09/2023	Sí		64	Hombre	Caucásico		Sí	Sí	Sí	Sí	No	No	No	NA	No	No	No	No	No	Sí	No		No				53	0	173	0	17.71	133	0	85	0	36.4
03	03-1	06/05/2022	Sí		05/05/2022	Sí		Grupo control (Fidaxomicina)	Sí	Vancomicina	Clostridium difficile	01/05/2022	05/05/2022	Sí		88	Hombre	Caucásico		Sí	Sí	Sí	Sí	No	No	No	NA	No	No	No	No	No	No	Sí	1	Sí	ND/ND/ND	05/05/2022	No	64	0	162	0	24.39	112	0	77	0
03	03-2	15/07/2022	Sí		14/07/2022	Sí		Grupo control (Fidaxomicina)	Sí	Vancomicina	Clostridium difficile	09/07/2022	13/07/2022	Sí		82	Mujer	Caucásico		Sí	Sí	Sí	Sí	No	No	No	NA	No	No	No	No	No	No	Sí	1	Sí	ND/ND/ND		Si	50	0	150	0	22.22	136	0	76	0
03	03-3	23/01/2023	Sí		23/01/2023	Sí		Grupo control (Fidaxomicina)	Sí	Vancomicina	CD	17/01/2023	21/01/2023	Sí		76	Mujer	Caucásico		Sí	Sí	Sí	Sí	No	No	No	NA	No	No	No	No	No	Sí	No		No				48	0	156	0	19.72		1		1
03	03-4	21/03/2023	Sí		21/03/2023	Sí		Grupo control (Fidaxomicina)	Sí	Vancomicina	CD	14/03/2023	18/03/2023	Sí		88	Mujer	Caucásico		Sí	Sí	Sí	Sí	No	No	No	NA	No	No	No	No	No	Sí	No		No				70	0	155	0	29.14		1		1
03	03-5	20/04/2023	Sí		19/04/2023	Sí		Grupo control (Fidaxomicina)	Sí	Vancomicina	Clostridium Difficile	16/04/2023	18/04/2023	Sí		54	Hombre	Caucásico		Sí	Sí	Sí	Sí	No	No	No	NA	No	No	No	No	No	Sí	No		No				90	0	174	0	29.73		1		1
04	04-1	31/03/2022	Sí		30/03/2022	Sí		Grupo experimental (MBK-01)	Sí	vancomicina	infección recurrente por Clostridioides difficile	27/03/2022	29/03/2022	Sí		70	Hombre	Caucásico		Sí	Sí	Sí	Sí	No	No	No	NA	No	No	No	No	No	No	Sí	2	No				84	0	171.5	0	28.56	147	0	106	0	36.5
05	05-1	13/02/2023	Sí		13/02/2023	Sí		Grupo experimental (MBK-01)	Sí	Vancomicina	CD+	08/02/2023	12/02/2023	Sí		21	Mujer	Caucásico		Sí	Sí	Sí	Sí	No	No	No	No	No	No	No	No	No	Sí	No		No				52.5	0	165	0	19.28	93	0	64	0	35.5
05	05-2	24/04/2023	Sí		24/04/2023	Sí		Grupo experimental (MBK-01)	Sí	Vancomicina	Infección Clostridum difficile	19/04/2023	22/04/2023	Sí		75	Mujer	Caucásico		Sí	Sí	Sí	Sí	No	No	No	NA	No	No	No	No	No	No	Sí	1	Sí	ND/ND/2003		Si	52	0	154	0	21.93	122	0	75	0	35.2
05	05-3	06/10/2023	Sí		06/10/2023	Sí		Grupo control (Fidaxomicina)	Sí	Vancomicina	Infección por Clostridium difficile	03/10/2023	05/10/2023	Sí		68	Mujer	Caucásico		Sí	Sí	Sí	Sí	No	No	No	NA	No	No	No	No	No	Sí	No		Sí	ND/ND/2007		Si	66.5	0	168	0	23.56	105	0	69	0	36
06	06-2	11/05/2022	Sí		11/05/2022	Sí		Grupo control (Fidaxomicina)	No							58	Mujer	Caucásico		Sí	Sí	Sí	Sí	No	No	No	No	No	No	No	No	No	No	Sí	ND	Sí	02/09/2021		Si	130	0	149	0	58.56	116	0	72	0	36.1
06	06-3	16/06/2022	Sí		16/06/2022	Sí		Grupo experimental (MBK-01)	No							64	Hombre	Caucásico		Sí	Sí	Sí	Sí	No	No	No	NA	No	No	No	No	No	No	Sí	ND	Sí	12/04/2022		Si	70	0	168	0	24.8	158	0	82	0	36.2
06	06-4	10/07/2023	Sí		10/07/2023	Sí		Grupo control (Fidaxomicina)	Sí	Vancomicina	recurrencia por Clostridium difficile	04/07/2022	09/07/2022	Sí		71	Hombre	Caucásico		Sí	Sí	Sí	Sí	No	No	No	NA	No	No	No	No	No	No	Sí	2	No				61	0	169	0	21.36	124	0	73	0	36.5
06	06-5	27/07/2023	Sí		26/07/2023	Sí		Grupo experimental (MBK-01)	Sí	Fidaxomicina	Infección por CD	25/07/2023	26/07/2023	Sí		72	Hombre	Caucásico		Sí	Sí	Sí	Sí	No	No	No	NA	No	No	No	No	No	No	Sí	3	Sí	30/09/2019		Si	70	0	169	0	24.51	148	0	95	0	36.7
07	07-1	30/03/2022	Sí		30/03/2022	Sí		Grupo experimental (MBK-01)	No							78	Mujer	Caucásico		Sí	Sí	Sí	Sí	No	No	No	NA	No	No	No	No	No	No	Sí	1	Sí	13/03/2022	15/03/2022	No	45	0		1		108	0	65	0	36.4
07	07-2	27/06/2022	Sí		27/06/2022	Sí		Grupo experimental (MBK-01)	No							44	Hombre	Caucásico		Sí	Sí	Sí	Sí	No	No	No	NA	No	No	No	No	No	No	Sí	2	No				91	0	180	0	28.09	112	0	68	0	36.3
07	07-3	09/01/2023	Sí		09/01/2023	Sí		Grupo experimental (MBK-01)	Sí	vancomicina	enterocolitis C difficile	04/01/2023	08/01/2023	Sí		56	Mujer	Caucásico		Sí	Sí	Sí	Sí	No	No	No	NA	No	No	No	No	No	No	Sí	3	No				54	0	156	0	22.19	113	0	60	0
07	07-4	19/04/2023	Sí		19/04/2023	Sí		Grupo control (Fidaxomicina)	Sí	Amoxicilina/ácido clavulánico	pico febril, con sospecha de infección no identificada	13/04/2023	18/04/2023	Sí		24	Mujer	Caucásico		Sí	Sí	Sí	Sí	No	No	No	No	No	No	No	No	No	No	Sí	2	Sí	31/03/2023	19/04/2023	No	65	0	162	0	24.77	110	0	72	0	36.7
07	07-5	26/04/2023	Sí		26/04/2023	Sí		Grupo experimental (MBK-01)	No							71	Mujer	Caucásico		Sí	Sí	Sí	Sí	No	No	No	NA	No	No	No	No	No	No	Sí	1	Sí	04/02/2022	28/04/2023	No	67.9	0	159	0	26.86	132	0	65	0	36.8
07	07-6	28/06/2023	Sí		28/06/2023	Sí		Grupo control (Fidaxomicina)	No							46	Mujer	Caucásico		Sí	Sí	Sí	Sí	No	No	No	No	No	No	No	No	No	No	Sí	2	No				67.3	0	157	0	27.3	117	0	64	0	36.4
08	08-1	21/03/2022	Sí		21/03/2022	Sí		Grupo experimental (MBK-01)	No							57	Mujer	Caucásico		Sí	Sí	Sí	Sí	No	No	No	NA	No	No	No	No	No	Sí	No		Sí	11/02/2022		Si	70	0	167	0	25.1	117	0	79	0	36.5
08	08-2	20/12/2022	Sí		20/12/2022	Sí		Grupo experimental (MBK-01)	Sí	vancomicina	infecicon clostridium difficile	14/12/2022	18/12/2022	Sí		86	Hombre	Caucásico		Sí	Sí	Sí	Sí	No	No	No	NA	No	No	No	No	No	No	Sí	8	No				65	0	163	0	24.46	100	0	60	0	35.8
08	08-3	02/01/2023	Sí		02/01/2023	Sí		Grupo experimental (MBK-01)	Sí	vancomcina	infeccion clostridium difficile	27/12/2022	31/12/2022	Sí		73	Mujer	Caucásico		Sí	Sí	Sí	Sí	No	No	No	NA	No	No	No	No	No	Sí	No		Sí	16/09/2021		Si	56.1	0	161	0	21.64	134	0	84	0	35.9
08	08-4	09/01/2023	Sí		09/01/2023	Sí		Grupo control (Fidaxomicina)	Sí	vancomicina	clostridium	03/01/2023	07/01/2023	Sí		70	Mujer	Caucásico		Sí	Sí	Sí	Sí	No	No	No	NA	No	No	No	No	No	Sí	No		Sí	20/05/2022		Si	77.8	0	156	0	31.97	128	0	86	0	36.4
08	08-5	17/01/2023	Sí		17/01/2023	Sí		Grupo experimental (MBK-01)	No							71	Mujer	Caucásico		Sí	Sí	Sí	Sí	No	No	No	NA	No	No	No	No	No	Sí	No		Sí	20/06/2014		Si	57.9	0	157.1	0	23.46	116	0	70	0	36.8
08	08-6	10/02/2023	Sí		10/02/2023	Sí		Grupo control (Fidaxomicina)	Sí	vancomicina	clostridium difficle	05/02/2023	08/02/2023	Sí		57	Mujer	Caucásico		Sí	Sí	Sí	Sí	No	No	No	NA	No	No	No	No	No	Sí	No		Sí	ND/04/2015		Si	52.9	0	163	0	19.91	94	0	62	0	36.4
08	08-7	03/03/2023	Sí		03/03/2023	Sí		Grupo experimental (MBK-01)	No							65	Mujer	Caucásico		Sí	Sí	Sí	Sí	No	No	No	NA	No	No	No	No	No	Sí	No		No				58.7	0	163	0	22.09	125	0	81	0	36.8
08	08-8	04/05/2023	Sí		04/05/2023	Sí		Grupo experimental (MBK-01)	Sí	vancomicina	clostridium	24/04/2023	02/05/2023	Sí		34	Mujer	Caucásico		Sí	Sí	Sí	Sí	No	No	No	No	No	No	No	No	No	No	Sí	1	No				56.8	0	156.5	0	23.19	121	0	72	0	36.3
08	08-9	12/05/2023	Sí		12/05/2023	Sí		Grupo control (Fidaxomicina)	Sí	levofloxacino	clostridium difficile	08/05/2023	10/05/2023	Sí		60	Hombre	Caucásico		Sí	Sí	Sí	Sí	No	No	No	NA	No	No	No	No	No	No	Sí	1	Sí	ND/03/2019		Si	113	0	169	0	39.56	98	0	78	0	36.9
08	08-10	24/05/2023	Sí		24/05/2023	Sí		Grupo control (Fidaxomicina)	No							63	Hombre	Caucásico		Sí	Sí	Sí	Sí	No	No	No	NA	No	No	No	No	No	Sí	No		No				80.4	0	177.5	0	25.52	118	0	72	0	36.5
08	08-11	01/06/2023	Sí		01/06/2023	Sí		Grupo experimental (MBK-01)	No							21	Mujer	Caucásico		Sí	Sí	Sí	Sí	No	No	No	No	No	No	No	No	No	Sí	No		No				97	0	160	0	37.89	129	0	71	0	36.8
08	08-12	30/06/2023	Sí		30/06/2023	Sí		Grupo control (Fidaxomicina)	Sí	ciprofloxacino y metronidazol	colitis terminal e ileitis	27/06/2023	30/06/2023	Sí		54	Mujer	Caucásico		Sí	Sí	Sí	Sí	No	No	No	NA	No	No	No	No	No	Sí	No		Sí	ND/03/2019		Si	79.3	0	172	0	26.81	104	0	58	0	36
08	08-13	06/07/2023	Sí		06/07/2023	Sí		Grupo experimental (MBK-01)	Sí	ciprofloxacino y metronidazol	colitis inespecifica	05/07/2023	06/07/2023	Sí		67	Mujer	Caucásico		Sí	Sí	Sí	Sí	No	No	No	NA	No	No	No	No	No	Sí	No		No				62.8	0	150	0	27.91	105	0	70	0	36.8
08	08-14	07/07/2023	Sí		07/07/2023	Sí		Grupo control (Fidaxomicina)	No							25	Mujer	Caucásico		Sí	Sí	Sí	Sí	No	No	No	No	No	No	No	No	No	Sí	No		Sí	ND/08/2022		Si	44.6	0	153	0	19.05	99	0	66	0	36.9
08	08-15	24/07/2023	Sí		24/07/2023	Sí		Grupo control (Fidaxomicina)	Sí	metronidazol	clostridium	19/07/2023	20/07/2023	Sí		59	Mujer	Caucásico		Sí	Sí	Sí	Sí	No	No	No	NA	No	No	No	No	No	Sí	No		No				49.5	0	156	0	20.34	100	0	58	0	36.3
09	09-4	21/06/2022	Sí		21/06/2022	Sí		Grupo control (Fidaxomicina)	No							86	Mujer	Caucásico		Sí	Sí	Sí	No	No	No	No	No	No	No	No	No	No	No	Sí	1	Sí	07/05/2012	01/07/2022	No	54.4	0	160	0	21.25		1		1	36.8
09	09-5	16/12/2022	Sí		16/12/2022	Sí		Grupo experimental (MBK-01)	No							57	Hombre	Caucásico		Sí	Sí	Sí	Sí	No	No	No	NA	No	No	No	No	No	Sí	No		Sí	08/12/2022	16/12/2022	No	68	0	178	0	21.46	103	0	71	0	37.7
09	09-6	21/12/2022	Sí		21/12/2022	Sí		Grupo experimental (MBK-01)	Sí	vancomidicna	CD	20/12/2022	20/12/2022	Sí		85	Mujer	Caucásico		Sí	Sí	Sí	Sí	No	No	No	No	No	No	No	No	No	Sí	No		Sí	27/05/2016		Si	70	0	174	0	23.12	110	0	70	0	35.6
09	09-7	30/12/2022	Sí		30/12/2022	Sí		Grupo experimental (MBK-01)	No							63	Hombre	Caucásico		Sí	Sí	Sí	Sí	No	No	No	NA	No	No	No	No	No	Sí	No		No				75	0	170	0	25.95	122	0	66	0	36.5
09	09-8	04/01/2023	Sí		04/01/2023	Sí		Grupo control (Fidaxomicina)	Sí	vancomicina	clostridium	04/01/2023	06/01/2023	Sí		79	Mujer	Caucásico		Sí	Sí	Sí	Sí	No	No	No	No	No	No	No	No	No	Sí	No		Sí	19/12/2019	12/01/2023	No	59	0	155	0	24.56	100	0	80	0	37.4
09	09-9	10/01/2023	Sí		10/01/2023	Sí		Grupo experimental (MBK-01)	No							73	Mujer	Caucásico		Sí	Sí	Sí	Sí	No	No	No	NA	No	No	No	No	No	No	Sí	1	Sí	01/08/2016	01/02/2023	No	56	0	148	0	25.57	119	0	57	0	36.6
09	09-10	24/01/2023	Sí		24/01/2023	Sí		Grupo experimental (MBK-01)	No							77	Hombre	Caucásico		Sí	Sí	Sí	Sí	No	No	No	NA	No	No	No	No	No	Sí	No		Sí	14/06/2012	26/01/2023	No	69	0	164	0	25.65	111	0	62	0	35.3
09	09-11	08/02/2023	Sí		08/02/2023	Sí		Grupo control (Fidaxomicina)	No							85	Mujer	Caucásico		Sí	Sí	Sí	Sí	No	No	No	NA	No	No	No	No	No	No	Sí	1	No				42.5	0	155	0	17.69	120	0	80	0	36.5
09	09-12	13/02/2023	Sí		13/02/2023	Sí		Grupo experimental (MBK-01)	Sí	vancomicina	diarrea	09/02/2023	11/02/2023	Sí		60	Hombre	Caucásico		Sí	Sí	Sí	Sí	No	No	No	NA	No	No	No	No	No	Sí	No		Sí	06/02/2023	11/02/2023	No	84	0	167	0	30.12	130	0	60	0	36.7
09	09-13	01/03/2023	Sí		01/03/2023	Sí		Grupo control (Fidaxomicina)	No							64	Hombre	Caucásico		Sí	Sí	Sí	Sí	No	No	No	NA	No	No	No	No	No	Sí	No		Sí	01/06/2015		Si	80	0	171	0	27.36	125	0	70	0	36.5
09	09-14	14/03/2023	Sí		14/03/2023	Sí		Grupo experimental (MBK-01)	No							65	Mujer	Caucásico		Sí	Sí	Sí	Sí	No	No	No	NA	No	No	No	No	No	No	Sí	1	Sí	04/10/2021		Si	50	0	163	0	18.82	110	0	70	0	35.6
09	09-15	16/03/2023	Sí		16/03/2023	Sí		Grupo control (Fidaxomicina)	Sí	vancomicina	DIARREA POR C DIFFICILE	13/03/2023	15/03/2023	Sí		80	Hombre	Caucásico		Sí	Sí	Sí	Sí	No	No	No	NA	No	No	No	No	No	Sí	No		Sí	03/01/2012	13/03/2023	No	72	0	160	0	28.12	135	0	60	0	35.7
09	09-16	17/03/2023	Sí		17/03/2023	Sí		Grupo control (Fidaxomicina)	No							49	Hombre	Caucásico		Sí	Sí	Sí	Sí	No	No	No	NA	No	No	No	No	No	Sí	No		No				142	0	178	0	44.82	125	0	90	0	36.2
09	09-17	03/05/2023	Sí		03/05/2023	Sí		Grupo experimental (MBK-01)	No							26	Hombre	Caucásico		Sí	Sí	Sí	Sí	No	No	No	NA	No	No	No	No	No	No	Sí	1	No				77.4	0	170	0	26.78	115	0	70	0	35.5
09	09-18	10/05/2023	Sí		10/05/2023	Sí		Grupo experimental (MBK-01)	No							60	Hombre	Caucásico		Sí	Sí	Sí	Sí	No	No	No	NA	No	No	No	No	No	Sí	No		No				87.3	0	175	0	28.51	125	0	75	0	36.4
09	09-19	20/06/2023	Sí		19/06/2023	Sí		Grupo experimental (MBK-01)	Sí	vancomicina	diarrea por CD	16/06/2023	19/06/2023	Sí		69	Mujer	Caucásico		Sí	Sí	Sí	Sí	No	No	No	NA	No	No	No	No	No	Sí	No		No				42.5	0	153	0	18.16	100	0	65	0	35.5
09	09-20	21/06/2023	Sí		21/06/2023	Sí		Grupo control (Fidaxomicina)	No							75	Hombre	Caucásico		Sí	Sí	Sí	Sí	No	No	No	NA	No	No	No	No	No	Sí	No		No				64	0		1		145	0	71	0	35.3
09	09-21	03/07/2023	Sí		03/07/2023	Sí		Grupo experimental (MBK-01)	Sí	vancomicina	infección por C. difficile	29/06/2023	01/07/2023	Sí		59	Hombre	Caucásico		Sí	Sí	Sí	Sí	No	No	No	NA	No	No	No	No	No	Sí	No		Sí	11/02/2021		Si	63.5	0	170	0	21.97	100	0	70	0	36.3
09	09-22	13/07/2023	Sí		13/07/2023	Sí		Grupo control (Fidaxomicina)	No							58	Mujer	Otra	latino	Sí	Sí	Sí	Sí	No	No	No	NA	No	No	No	No	No	Sí	No		No				59.5	0	146	0	27.91	103	0	69	0	35.6
09	09-23	08/09/2023	Sí		07/09/2023	Sí		Grupo experimental (MBK-01)	Sí	piperacilina tazobactam	enteritis	04/09/2023	06/09/2023	Sí		76	Mujer	Caucásico		Sí	Sí	Sí	Sí	No	No	No	NA	No	No	No	No	No	Sí	No		No				55.7	0	149	0	25.09	130	0	70	0	36.6
09	09-24	18/09/2023	Sí		18/09/2023	Sí		Grupo experimental (MBK-01)	No							60	Mujer	Caucásico		Sí	Sí	Sí	Sí	No	No	No	NA	No	No	No	No	No	Sí	No		No				53.2	0	163	0	20.02	138	0	70	0	35.8
11	11-1	21/12/2022	Sí		21/12/2022	Sí		Grupo experimental (MBK-01)	No
11	11-2	28/12/2022	Sí		28/12/2022	Sí		Grupo experimental (MBK-01)	No							36	Mujer	Amerindio		Sí	Sí	Sí	Sí	No	No	No	No	No	No	No	No	No	Sí	No		No				67	0	158	0	26.84	117	0	70	0	36.3
11	11-3	10/01/2023	Sí		10/01/2023	Sí		Grupo control (Fidaxomicina)	No							66	Mujer	Caucásico		Sí	Sí	Sí	Sí	No	No	No	NA	No	No	No	No	No	Sí	No		Sí	ND/ND/ND		Si	69.7	0	163	0	26.23	122	0	84	0	36.3
11	11-4	17/01/2023	Sí		17/01/2023	Sí		Grupo control (Fidaxomicina)	No							52	Mujer	Caucásico		Sí	Sí	Sí	Sí	No	No	No	NA	No	No	No	No	No	Sí	No		No				69.9	0	165.5	0	25.52	140	0	81	0	34.6
11	11-5	26/01/2023	Sí		26/01/2023	Sí		Grupo experimental (MBK-01)	No							81	Mujer	Caucásico		Sí	Sí	Sí	Sí	No	No	No	NA	No	No	No	No	No	No	Sí	1	Sí	ND/ND/ND		Si	71.4	0	156	0	29.34	122	0	72	0	35.7
11	11-6	17/03/2023	Sí		17/03/2023	Sí		Grupo control (Fidaxomicina)	Sí	vancomicina	C. difficile					53	Hombre	Caucásico		Sí	Sí	Sí	Sí	No	No	No	NA	No	No	No	No	No	Sí	No		Sí	10/03/2023	17/03/2023	No	68.3	0	178	0	21.56	117	0	78	0	36.3
11	11-7	10/05/2023	Sí		10/05/2023	Sí		Grupo control (Fidaxomicina)	Sí	vancomicina	C. difficile	06/05/2023	09/05/2023	Sí		81	Mujer	Caucásico		Sí	Sí	Sí	Sí	No	No	No	NA	No	No	No	No	No	Sí	No		Sí	ND/ND/ND	ND/ND/ND	No	63.2	0	154	0	26.65	127	0	83	0	35
11	11-8	31/05/2023	Sí		30/05/2023	Sí		Grupo control (Fidaxomicina)	No			26/05/2023	29/05/2023	Sí		70	Hombre	Caucásico		Sí	Sí	Sí	Sí	No	No	No	NA	No	No	No	No	No	Sí	No		Sí	ND/ND/ND	31/05/2023	No	87	0	168	0	30.82	123	0	77	0	36.1
11	11-9	17/07/2023	Sí		17/07/2023	Sí		Grupo control (Fidaxomicina)	No			12/07/2023	15/07/2023	Sí		75	Mujer	Caucásico		Sí	Sí	Sí	Sí	No	No	No	NA	No	No	No	No	No	Sí	No		Sí	ND/ND/ND	ND/ND/ND	No	61.2	0	151	0	26.84	127	0	72	0	35.2
11	11-10	28/07/2023	Sí		28/07/2023	Sí		Grupo control (Fidaxomicina)	Sí	Vancomicina	diarrea por C. Difficile					63	Hombre	Caucásico		Sí	Sí	Sí	Sí	No	No	No	NA	No	No	No	No	No	Sí	No		No				81.6	0	170	0	28.24	144	0	86	0	35.3
11	11-11	08/08/2023	Sí		08/08/2023	Sí		Grupo control (Fidaxomicina)	Sí	Vancomicina	C. Difficile	04/08/2023	06/08/2023	Sí		64	Mujer	Caucásico		Sí	Sí	Sí	Sí	No	No	No	NA	No	No	No	No	No	Sí	No		No				52.3	0	161	0	20.18	107	0	61	0	35.6
11	11-12	28/08/2023	Sí		28/08/2023	Sí		Grupo control (Fidaxomicina)	No			23/08/2023	26/08/2023	Sí		55	Mujer	Caucásico		Sí	Sí	Sí	Sí	No	No	No	NA	No	No	No	No	No	Sí	No		No				51.9	0	162	0	19.78	111	0	68	0	34.6
12	12-1	26/04/2022	Sí		26/04/2022	Sí		Grupo control (Fidaxomicina)	Sí	Vancomicina	Tratamiento pautado en urgencias					62	Mujer	Caucásico		Sí	Sí	Sí	Sí	No	No	No	NA	No	No	No	No	No	No	Sí	1	No				47.5	0	155	0	19.77	143	0	85	0	35.7
13	13-1	31/08/2023	Sí		30/08/2023	Sí		Grupo experimental (MBK-01)	Sí	Vancomicina	Clostridium	27/08/2023	30/08/2023	Sí		75	Mujer	Caucásico		Sí	Sí	Sí	Sí	No	No	No	NA	No	No	No	No	No	No	Sí	2	Sí	02/12/2016	25/08/2023	No	45	0	150	0	20	170	0	83	0	35.8
16	16-1	21/06/2022	Sí		21/06/2022	Sí		Grupo control (Fidaxomicina)	No			17/06/2022	19/06/2022	Sí		71	Mujer	Caucásico		Sí	Sí	Sí	Sí	No	No	No	NA	No	No	No	No	No	No	Sí	1	No				56.7	0	155	0	23.6	138	0	84	0	36.2
17	17-1	25/03/2022	Sí		25/03/2022	Sí		Grupo control (Fidaxomicina)	No							77	Hombre	Caucásico		Sí	Sí	Sí	Sí	No	No	No	NA	No	No	No	No	No	No	Sí	1	Sí	ND/ND/2022		Si	61	0	172	0	20.62	115	0	75	0	36.9
17	17-2	06/04/2022	Sí		06/04/2022	Sí		Grupo experimental (MBK-01)	No							65	Mujer	Caucásico		Sí	Sí	Sí	Sí	No	No	No	NA	No	No	No	No	No	No	Sí	3	Sí	18/07/2012		Si	100	0	152	0	43.28	145	0	84	0	36.7
17	17-3	05/08/2022	Sí		05/08/2022	Sí		Grupo control (Fidaxomicina)	No							67	Mujer	Caucásico		Sí	Sí	Sí	Sí	No	No	No	NA	No	No	No	No	No	No	Sí	1	Sí	29/07/2021		Si	65	0	158	0	26.04	96	0	62	0	36.2
17	17-4	14/12/2022	Sí		14/12/2022	Sí		Grupo experimental (MBK-01)	No							85	Mujer	Caucásico		Sí	Sí	Sí	Sí	No	No	No	NA	No	No	No	No	No	No	Sí	2	Sí	08/05/2018		Si	63.4	0	159	0	25.08	107	0	72	0	35.4
17	17-5	09/03/2023	Sí		09/03/2023	Sí		Grupo control (Fidaxomicina)	Sí	Vancomicina	Diarrea					66	Mujer	Caucásico		Sí	Sí	Sí	Sí	No	No	No	NA	No	No	No	No	No	No	Sí	1	Sí	20/01/2021		Si	85.8	0	170	0	29.69	166	0	94	0	36.5
17	17-6	27/03/2023	Sí		27/03/2023	Sí		Grupo experimental (MBK-01)	Sí	Ceftriaxona	Diarrea	23/03/2023	26/03/2023	Sí		88	Mujer	Caucásico		Sí	Sí	Sí	Sí	No	No	No	NA	No	No	No	No	No	Sí	No		Sí	13/12/2016		Si	63.9	0	155	0	26.6	136	0	66	0
18	18-1	11/10/2022	Sí		11/10/2022	Sí		Grupo experimental (MBK-01)	Sí	ceftriaxona	Profilaxis	10/10/2022	11/10/2022	Sí		84	Mujer	Caucásico		Sí	Sí	Sí	Sí	No	No	No	NA	No	No	No	No	No	Sí	No		Sí	20/10/2021	11/10/2022	No	76	0	150	0	33.78	112	0	84	0	36.2
18	18-2	26/01/2023	Sí		26/01/2023	Sí		Grupo experimental (MBK-01)	Sí	ciprofloxacino	posible infección urinaria	24/01/2023	26/01/2023	Sí		93	Mujer	Caucásico		Sí	Sí	Sí	Sí	No	No	No	NA	No	No	No	No	No	Sí	No		No				57	0	150	0	25.33	123	0	63	0	36.2
18	18-3	01/02/2023	Sí		01/02/2023	Sí		Grupo experimental (MBK-01)	Sí	Vancomicina	Clostridium	30/01/2023	31/01/2023	Sí		68	Mujer	Caucásico		Sí	Sí	Sí	Sí	No	No	No	NA	No	No	No	No	No	Sí	No		Sí	24/10/2008		Si	57	0	152	0	24.67	132	0	69	0	36.8
20	20-1	11/08/2022	Sí		10/08/2022	Sí		Grupo control (Fidaxomicina)	Sí	Vancomicina	Clostridium Difficile	08/08/2022	10/08/2022	Sí		76	Hombre	Asiático		Sí	Sí	Sí	Sí	No	No	No	NA	No	No	No	No	No	No	Sí	1	Sí	06/08/2022	12/08/2022	No	63	0	164	0	23.42	100	0	60	0	36.3
20	20-2	14/12/2022	Sí		13/12/2022	Sí		Grupo control (Fidaxomicina)	Sí	Vancomicina	Clostridium Difficile	10/12/2022	12/12/2022	Sí		51	Mujer	Caucásico		Sí	Sí	Sí	Sí	No	No	No	NA	No	No	No	No	No	No	Sí	1	Sí	28/11/2022	01/12/2022	No	67.7	0	165	0	24.87	100	0	60	0	37.1
21	21-1	15/12/2022	Sí		14/12/2022	Sí		Grupo control (Fidaxomicina)	Sí	vancomicina	infección por clostridium	09/12/2022	14/12/2022	Sí		91	Hombre	Caucásico		Sí	Sí	Sí	Sí	No	No	No	NA	No	No	No	No	No	No	Sí	1	Sí	09/12/2022	16/12/2022	No	83	0	180	0	25.62	112	0	68	0	36.2
21	21-2	04/01/2023	Sí		03/01/2023	Sí		Grupo experimental (MBK-01)	Sí	Vancomicina	Clostridium Difficile	30/12/2022	03/01/2023	Sí		58	Hombre	Caucásico		Sí	Sí	Sí	Sí	No	No	No	NA	No	No	No	No	No	Sí	No		Sí	29/12/2022	02/01/2023	No	126	0	183	0	37.62	139	0	91	0	36.7
21	21-3	20/06/2023	Sí		19/06/2023	Sí		Grupo control (Fidaxomicina)	Sí	Vancomicina	Clostridium Dificile	14/06/2023	19/06/2023	Sí		64	Hombre	Caucásico		Sí	Sí	Sí	Sí	No	No	No	NA	No	No	No	No	No	Sí	No		Sí	ND/ND/2015		Si	72.5	0	167	0	26	147	0	80	0	36.8
21	21-4	07/09/2023	Sí		06/09/2023	Sí		Grupo experimental (MBK-01)				02/09/2023	06/09/2023	Sí		73	Mujer	Caucásico		Sí	Sí	Sí	Sí	No	No	No	NA	No	No	No	No	No	Sí	No		Sí	31/08/2023	07/09/2023	No	65	0	158	0	26.04	151	0	79	0	36.5
[truncated: 303 more columns]

## Sheet: Historia Clínica Previa
Nº de Paciente	Nº	Diagnóstico	Fecha inicio	Fecha resolución	Continúa
01-1	1	Bilateral COVID-19 pneumonia	28/03/2020	05/06/2020
01-1	2	Diabetes Mellitus type 2	ND/ND/2013		Si
01-1	3	Dyslipemia	ND/ND/2013		Si
01-1	4	Chronic stable ischemic heart disease	ND/ND/2005		Si
01-1	5	clostridium difficile infection	10/09/2021	27/09/2021
01-2	1	Prostatic adenocarcinoma	08/10/2021	05/01/2022
01-2	2	laparoscopic radical prostatectomy	05/01/2022	05/01/2022
01-2	3	Right orchiepididymitis	24/01/2022	21/02/2022
01-2	4	Anisakis allergy	ND/ND/2002		Si
01-2	5	Dyslipemia	ND/ND/2001		Si
01-2	6	clostridium difficile infection	02/02/2022	23/02/2022
01-3	1	Conjuntivitis en ojo derecho	23/05/2022	29/05/2022
01-3	2	Fallo ovarico precoz	ND/ND/2017		Si
01-3	3	Miomas uterinos	ND/ND/2020		Si
01-3	4	Esofago de Barret	ND/ND/2016		Si
01-3	5	Parálisis periférica derecha	ND/ND/2019		Si
01-3	6	infeccion por Clostridium difficile	08/06/2022	18/06/2022
01-4	1	Adenocarcinoma de endometrio	ND/ND/2004	ND/ND/2004
01-4	2	Hepatitis C postransfusional	ND/ND/2008	ND/ND/2008
01-4	3	Angioedema histaminergcio idiopatico recurrente	ND/ND/ND	ND/ND/ND
01-4	4	Rinoconjuntivitis alergica	ND/ND/ND	ND/ND/ND
01-4	5	Alergia a AINEs	ND/ND/ND	ND/ND/ND
01-4	6	Infeccion por clostridium difficile	11/09/2022	29/09/2022
01-5	1	Colon irritable	ND/ND/2013		Si
01-5	2	Safenectomía	ND/ND/2009	ND/ND/2009
01-5	3	Embolización de arterias uterinas POR TROMBOFLEBITIS	ND/ND/2009		Si
01-6	1	Degeneracion macular	ND/ND/ND		Si
01-6	2	Ansiedad	ND/ND/ND		Si
01-6	3	Talasemia minor	ND/ND/ND		Si
01-6	4	Colecistitis aguda	ND/ND/2022	ND/05/2022
01-6	5	Colecistostomía	25/05/2022	25/05/2022
01-6	6	Hernia inguinal	ND/ND/ND		Si
01-6	7	Varices en miembros inferiores	ND/ND/ND		Si
01-6	8	Perforación intestinal	ND/ND/2006	ND/ND/2006
01-6	9	Peritonitis difusa	ND/ND/2006	ND/ND/2006
01-6	10	Shock séptico	ND/ND/2006	ND/ND/2006
01-8	1	Virus Hepatitis C	ND/ND/2018	ND/ND/ND
01-8	2	Prostatitis	23/11/2017	27/09/2018
01-8	3	Nevus retiniano	20/07/2023		Si
01-8	4	trastorno del ánimo y trastorno obsesivo-compulsivo de personalidad	ND/ND/ND		Si
03-1	1	Hipertensión arterial	ND/ND/ND		Si
03-1	2	Ureterolitotomia izquierda abierta	ND/ND/ND	ND/10/2014
03-1	3	Adenocarcinoma de próstata	ND/ND/ND		Si
03-1	4	Proctitis actínica	ND/ND/ND	ND/04/2013
03-1	5	Insuficiencia cardiaca	ND/ND/ND		Si
03-1	6	Fibrilación auricular permanente	ND/ND/ND		Si
03-1	7	Degeneración macular asociada a la edad exudativa	ND/ND/ND		Si
03-1	8	Colecistectomia	ND/10/2012	ND/10/2012
03-1	9	Clostridium difficile	11/02/2022	ND/02/2022
03-2	1	Demyelinating neurophaty	ND/01/2021		Si
03-2	2	Cognitive impairment (suggestive of Alzheimer's disease)	ND/ND/ND		Si
03-2	3	IgH-FR rearrangement positive	ND/ND/2008		Si
03-2	4	Sliding hiatal hernia	ND/ND/2017		Si
03-2	5	Nonspecific chronic gastritis	ND/ND/ND		Si
03-2	6	Hepatic hemangioma	ND/ND/ND		Si
03-2	7	Simple hepatic cyst	ND/ND/ND		Si
03-2	8	Severe caloric malnutrition	ND/ND/ND		Si
03-2	9	Hypercalcemia	ND/ND/ND		Si
03-2	10	Sarcoidosis	ND/ND/ND		Si
03-2	11	Fibromyalgia	ND/ND/ND		Si
03-2	12	Osteoporosis	ND/ND/ND		Si
03-2	13	Left renal hiliocystosis	ND/ND/ND		Si
03-2	14	Simple cysts in the left kidney	ND/ND/ND		Si
03-2	15	Clostridium difficile	ND/ND/ND	ND/ND/ND
03-3	1	Hypercholesterolemia	ND/ND/ND		Si
03-3	2	Valvular heart disease	ND/ND/1954		Si
03-3	3	Permanent atrial fibrillation	ND/ND/ND		Si
03-3	4	Intraductal carcinoma	13/06/2022		Si
03-3	5	Osteoarthritis	ND/ND/ND		Si
03-4	1	High blood pressure	ND/ND/ND		Si
03-4	2	Stroke/Ictus	ND/ND/2013	ND/ND/2013
03-4	3	Influenza A respiratory infection	ND/02/2023	ND/02/2023
03-4	4	Post-surgical hypothyroidism	ND/ND/ND		Si
03-4	5	Iron deficiency anemia	ND/ND/ND		Si
03-5	1	Trasplante hepatico	14/11/2016	14/11/2016
03-5	2	Colangitis	ND/ND/2016	ND/ND/2016
03-5	3	Colitis derecha con microperforación	ND/ND/2014	ND/ND/2014
03-5	4	Antígeno prostático específico alto	ND/07/2022		Si
03-5	5	Hipertensión arterial	ND/ND/ND		Si
04-1	1	Colitis ulcerosa extensa	15/07/2021		Si
04-1	2	Hipertensión arterial	04/06/2021		Si
05-1	1	Quistes en pabellón auricular infectada	ND/ND/2021		Si
05-1	2	Cistitis	26/12/2022	28/01/2023
05-1	3	Pielonefritis aguda derecha	24/01/2023	04/02/2023
05-2	1	Cáncer de colon. Libre de enfermedad	ND/ND/2004	ND/ND/2004
05-2	2	Síndrome de Raynaud	22/11/2012		Si
05-2	3	Esclerosis sistèmica difusa	ND/ND/2009		Si
05-2	4	Psoriasis cutánea	ND/ND/1999		Si
05-2	5	Osteopenia	ND/07/2013		Si
05-2	6	Helicobacter pylori infección	ND/01/2023	ND/ND/2023
05-2	7	Infección por Clostridium difficile	07/03/2023	26/03/2023
05-2	8	Neumopatia intersticial	29/01/2009		Si
05-2	9	Insuficiència mitral severa	13/10/2011		Si
05-2	10	Dislipidemia	ND/ND/ND		Si
05-2	11	Ansiedad	ND/ND/1993		Si
05-3	1	Hipertensión arterial	ND/ND/ND		Si
05-3	2	Insuficiencia mitral	ND/ND/2019		Si
05-3	3	Fibrilación auricular paroxística	ND/ND/ND		Si
05-3	4	Diabetes Mellitus Tipo 1	ND/ND/1999		Si
05-3	5	Polineuropatía diabética	ND/ND/2005		Si
05-3	6	Insuficiencia Renal Crónica estadio lllB	ND/ND/2000		Si
05-3	7	Gammapatía monoclonal	ND/ND/2019		Si
05-3	8	Artritis Reumatoidea	ND/ND/2007		Si
05-3	9	Asma	ND/ND/2001		Si
05-3	10	Hiperparatiroidismo	ND/ND/1999		Si
05-3	11	Hipotiroidismo	ND/ND/1999		Si
05-3	12	Hernia diafragmática	ND/ND/2003		Si
05-3	13	Insuficiencia venosa con Trombosis venosa profunda	ND/04/2013		Si
05-3	14	Bacteriemia por listeria con absceso hepático	ND/ND/2013		Si
05-3	15	Vitiligo	ND/ND/1969		Si
05-3	16	Neumonía adquirida en la comunidad	01/09/2023	13/09/2023
05-3	17	Derrame pleural metaneumónico	02/09/2023	13/09/2023
05-3	18	Hiperuricemia	ND/ND/2008		Si
05-3	19	Anemia ferropénica	ND/ND/2011		Si
05-3	20	Osteoporosis	ND/ND/2014		Si
05-3	21	Síntomas depresivos	ND/04/2013		Si
06-2	1	Cirugía bariátrica	22/01/2022	ND/ND/ND
06-2	2	2 cesáreas	ND/ND/ND	ND/ND/ND
06-2	3	Duodenitis	ND/ND/ND	ND/ND/ND
06-2	4	pseudopolipo duodenal	ND/ND/ND	ND/ND/ND
06-2	5	Obesidad	ND/ND/ND	ND/ND/ND
06-3	1	Tuberculosis	ND/ND/ND	ND/ND/ND
06-3	2	Hernia hiatal.	ND/ND/ND	ND/ND/ND
06-3	3	Apendicetomía	ND/ND/ND	ND/ND/ND
06-3	4	IQ de glándulas salivares.	ND/ND/ND	ND/ND/ND
06-3	5	toxina de Cl. Difficile	08/04/2022	ND/ND/ND
06-3	6	Depresion mayor	ND/ND/ND		Si
06-4	1	Depresión	ND/ND/ND	03/10/2023
06-4	2	Coledocolitiasis, Pancreatitis	ND/ND/ND	ND/ND/ND
06-4	3	Artrosis	ND/ND/ND	ND/ND/ND
06-5	1	Diarrea por cLostridium Dificile ingresado en infecciosos en Mayo 2023	ND/05/2023	ND/06/2023
06-5	2	Demencia Fronto Temporal en seguimiento por Neurología	ND/ND/ND		Si
06-5	3	Catater doble J retirados en Junio del 2023	ND/ND/ND	ND/06/2023
06-5	4	Intervención Aneurisma aorta abdominal infrarrenal roto	ND/02/2023	ND/02/2023
06-5	5	HTA	ND/ND/ND		Si
06-5	6	DLP	ND/ND/ND		Si
07-1	1	hipertension arterial	21/11/2004		Si
07-1	2	dislipemia	21/02/1995		Si
07-1	3	bronquiectasias	06/07/2012		Si
07-1	4	trastorno ansioso depresivo	ND/ND/ND		Si
07-1	5	Artrosis L5-SI	03/04/2014		Si
07-1	6	Estenosis aortica moderada	ND/02/2022		Si
07-1	7	Enterocolitis por C. difiicile	12/03/2022	21/03/2022
07-2	1	policitemia vera	ND/ND/ND		Si
07-2	2	colitis ulcerosa	ND/ND/2019		Si
07-2	3	colitis por citomegalovirus	ND/05/2022	21/06/2022
07-2	4	infección por Clostridium difficile	ND/04/2022	ND/05/2022
07-2	5	Infección por C.difficile con diarrea de hasta 20 deposiciones/día	23/05/2022	03/06/2022
07-2	6	Deposiciones líquidas	21/06/2022	11/07/2022
07-3	1	colitis ulcesora	05/02/2017		Si
07-3	2	Infección por COVID-19	17/02/2022	ND/ND/ND
07-3	3	Anemia intensa	ND/ND/ND	ND/ND/ND
07-3	4	clinica activa con Antigeno/cultico y PCR positiva para C difficile toxigénico	04/01/2019	30/01/2019
07-3	5	clinica de dolor abdominal, deposiciones diarrica y con determinacion positiva C. difficile	08/11/2021	ND/02/2022
07-3	6	Deposiciones diarreicas con estudio de heces positiva C. dificcile	07/11/2022	14/11/2022
07-3	7	Insomnio	09/08/2022		Si
07-4	1	Trastorno conducta alimentaria - Bulimina	ND/ND/ND		Si
07-4	2	Sarcoma pleomórfico indiferenciado de alto grado EN RAMAS ILIO E ISQUIOPUBIANA IZQUIERDA	08/11/2022		Si
07-4	3	enterocolitis por C difficile	25/01/2023	03/02/2023
07-4	4	enterocolitis por C difficile (1º reicidiva)	12/02/2023	17/02/2023
07-4	5	Pico febril	06/04/2023	07/04/2023
07-4	6	Dolor abdominal	17/04/2023	21/04/2023
07-4	7	Infección superficial herida quirúrgico	30/03/2023	16/05/2023
07-5	1	Hipertensión arterial	19/07/2010		Si
07-5	2	Mieloma Múltiple IgG kappa	ND/01/2022		Si
07-5	3	cuadro variante de Guillain-Barré axonal en posible relación con bortezomib	ND/03/2022	24/04/2022
07-5	4	Neumonía	05/06/2022	07/06/2022
07-5	5	enterocolitis por C difficile	23/02/2023	05/03/2023
07-5	6	Trombosis venosa profunda en pierna izquierda	15/06/2022	13/07/2022
07-5	7	polineuropatia sensitivo motora axonal	ND/03/2022		Si
07-5	8	Insomnio	24/02/2022		Si
07-5	9	Osteopenia	13/04/2015		Si
07-6	1	rinitis alergica	09/12/2021		Si
07-6	2	anemia ferropenica	16/10/2019		Si
07-6	3	diarrea y fiebre positivo para C dificile toxigenico	21/04/2023	08/05/2023
07-6	4	Reicidiva C. difficile	10/05/2023	10/06/2023
08-1	1	polipos gastricos	11/02/2020	11/02/2020
08-1	2	hernia	11/02/2020	11/02/2020
08-1	3	dislipemia	ND/ND/ND		Si
08-1	4	insomnio	ND/ND/ND		Si
08-1	5	ITU de repetición	ND/ND/ND		Si
08-2	1	diabetes mellitus tipo 2	ND/ND/2020		Si
08-2	2	deterioro cognitivo moderado con cuadro rigido acinetico bilateral	ND/ND/2020		Si
08-2	3	fibrilacion auricular anticoagulada	ND/ND/2020		Si
08-2	4	trombosis venosa profunda extensa	ND/ND/2015		Si
08-2	5	anemia ferropenica cronica	ND/ND/2014		Si
08-2	6	hernia inguinal derecha voluminosa, poratodr de sonda	ND/12/2020		Si
08-2	7	neumonia por infeccion sars cov 2	24/12/2021	03/01/2022
08-3	1	hiperhidrosis	ND/ND/1999		Si
08-3	2	migraña cronica	ND/ND/2011		Si
08-3	3	trastorno adaptativo mixto	ND/ND/2013		Si
08-3	4	glaucoma	ND/ND/2014		Si
08-3	5	diarrea cronica	ND/ND/2017	ND/ND/2017
08-3	6	hiperparatiroidismo	ND/ND/2018		Si
08-3	7	SAHS moderado	ND/ND/2020	ND/ND/2020
08-3	8	poliomielitis con secuela. pie cavo con afectacion del retropie	ND/ND/2021		Si
08-3	9	lumbalgia cronica	ND/ND/2021		Si
08-3	10	diabetes mellitus tipo 2	ND/ND/2022		Si
08-4	1	hta	ND/ND/2006		Si
08-4	2	hipercolesterolemia	ND/ND/2020		Si
08-4	3	hipotiroidismo	ND/ND/2021		Si
08-4	4	migraña con aura	ND/ND/2016		Si
08-4	5	ansiedad	ND/ND/2004		Si
08-4	6	infeccion covid	ND/10/2022	ND/10/2022
08-4	7	colitis inespecifica	ND/11/2022		Si
08-5	1	hipertesion	ND/10/2018		Si
08-5	2	dislipemia	ND/07/2009		Si
08-5	3	ERC (síndrome nefrítico) estadio 3	ND/02/2022		Si
08-5	4	artritis reumatoide	ND/03/2005		Si
08-5	5	osteopenia	ND/02/2019		Si
08-5	6	hipovitaminosis D	ND/03/2016		Si
08-5	7	hipertrofia ventricular izq concentrica moderada	ND/07/2020		Si
08-5	8	tuberculosis diseminada	ND/11/2021		Si
08-5	9	ansiedad	ND/12/2022		Si
08-5	10	depresion	ND/12/2022		Si
08-5	11	infeccion sars cov 2	28/01/2022	07/02/2022
08-6	1	dislipemia	ND/ND/2015		Si
08-6	2	discopatia L5-S1 con moderada-severa estenosis foraminal izquierda con ralocupatia	ND/ND/2018		Si
08-6	3	trastorno de ansiedad generalizada	ND/ND/2001	ND/ND/2015
08-6	4	sindrome ansioso depresivo	ND/ND/2015		Si
08-6	5	trastorno adaptativo mixto	ND/ND/2022		Si
08-6	6	insomnio	ND/ND/2019		Si
08-6	7	polipos adenomatosos colonicos	ND/ND/2009	ND/05/2017
08-6	8	cervicalgia y lumbalgia	ND/ND/2021		Si
08-7	1	hipertension arterial	ND/07/2017		Si
08-7	2	hipotiroidismo subclinico	ND/01/2022		Si
08-7	3	insomnio	ND/10/2012		Si
08-7	4	ansiedad	ND/07/2021		Si
08-7	5	artritis degenerativa	ND/ND/2000		Si
08-7	6	tendinopatia calcificante	ND/07/2008		Si
08-7	7	lumbalgia	ND/ND/2000		Si
08-7	8	queratosis seborreica	ND/03/2021		Si
08-7	9	colecistectomia	ND/ND/2008	ND/ND/2008
08-7	10	dislipemia	ND/05/2013		Si
08-8	1	migraña sin aura	ND/11/2020		Si
08-8	2	prolapso uterino posterio al parto	ND/03/2016		Si
08-8	3	incontinencia urinaria	ND/04/2020	ND/04/2022
08-8	4	deficit vitamina D	ND/04/2023		Si
08-9	1	hipertension	ND/ND/2015		Si
08-9	2	dislipemia	ND/03/2014		Si
08-9	3	ansiedad	ND/02/2023		Si
08-9	4	hiperuricemia	ND/01/2023		Si
08-9	5	obesidad morbida	ND/ND/2019		Si
08-9	6	dismetria MID de nacimiento	ND/11/1962		Si
08-9	7	artrosis	ND/ND/ND		Si
08-9	8	carcinoma renal izquierdo	ND/02/2023	ND/03/2023
08-9	9	tumorestomia	ND/03/2023	ND/03/2023
08-9	10	primer episodio de clostridium	ND/01/2023	ND/02/2023
08-9	11	condromalacia	ND/03/2019		Si
08-9	12	Fractura de meseta tibial	ND/03/2019	ND/03/2019
08-10	1	dislipemia	ND/12/2019		Si
08-10	2	sindrome trastorno adaptativo	ND/ND/2000		Si
08-10	3	hipertrofia benigna de prostata	ND/05/2023		Si
08-10	4	disfuncion temporo-mandiibular	ND/03/2023		Si
08-10	5	colesteatoma oido izquierdo	ND/07/2021	ND/07/2021
08-10	6	colocacion implante osteointegrado	ND/03/2019	ND/03/2019
08-10	7	implante osteointegrado	ND/04/2023	ND/04/2023
08-10	8	fistula perianal	ND/10/2005	ND/10/2005
08-11	1	hidradenitis supurativa	ND/03/2023		Si
08-11	2	cirugia fistula perianal	15/05/2023	15/05/2023
08-11	3	sindrome ovario poliquistico	ND/03/2020		Si
08-12	1	HTA	ND/ND/2019		Si
08-12	2	dislipemia	ND/08/2020		Si
08-12	3	espondiloartrosis	ND/01/2016		Si
08-12	4	probable ACVA isquemico de perfil lacunar hemisferio derecho	ND/06/2020	ND/06/2020
08-12	5	edemas en EEII posible insuficiencia venosa	ND/08/2022		Si
08-12	6	insomnio	ND/05/2023		Si
08-12	7	cirugia bariatrica	ND/01/2020	ND/01/2020
08-12	8	colicestomia	ND/04/2022	ND/04/2022
08-12	9	cesarea	ND/01/2004	ND/01/2004
08-12	10	posible insuficiencia venosa	ND/08/2022		Si
08-12	11	colitis terminal	29/06/2023		Si
08-12	12	ileitis	29/06/2023		Si
08-13	1	HTA	ND/03/2004		Si
08-13	2	dislipemia	ND/08/2007		Si
08-13	3	accidente isquemico transitorio	ND/01/2004	ND/01/2004
08-13	4	sindrome ansioso depresivo	ND/12/2002		Si
08-13	5	dispepsia	ND/05/2003		Si
08-13	6	hernia discal lumbal	ND/11/2010		Si
08-13	7	neuritis vestibular izquierda	ND/11/2022		Si
08-13	8	varices en extremidades inferiores	ND/12/2017		Si
08-14	1	trastorno ansioso depresivo	ND/ND/2014		Si
08-14	2	epigastralgia	ND/ND/2022	ND/07/2023
08-14	3	infeccion por helicobacter pylori	30/05/2023	08/06/2023
08-14	4	ferropenia sin anemia en periodo de menstruacion	ND/05/2023		Si
08-15	1	bocio multinodular eutiroideo	ND/05/2016		Si
08-15	2	nodulo TIRADS 4 en LTI de 16mm	ND/03/2020		Si
09-4	1	Epìsodio de ICD tratrado con Vancomicina	28/05/2022	07/06/2022
09-4	2	LUMBALGIA CRÓNICA	ND/09/2018		Si
09-4	3	Enfermedad renal crónica 3A con creatinina	ND/ND/ND		Si
09-4	4	Cardiopatía isquémica con FEVI preservada, EAC 2 vasos. Fibrilación auricular, anticoagulaicón.	ND/ND/ND		Si
09-4	5	Leucemia mielomonocítica crónica	ND/ND/ND		Si
09-4	6	Enfermedad cerebrovascular establecia (leucopatía isquémica crónica). Distonía segmentaria (Blefaroespasmo y distonía laríngea)	ND/ND/ND		Si
09-4	7	Poliartritis microcistralina	ND/ND/ND		Si
09-4	8	Infección por SARS-CoV-2	08/03/2022	ND/ND/ND
09-4	9	Según informe de alergia: lidocaína	ND/ND/ND		Si
09-4	10	alergia: quinolonas	ND/ND/ND		Si
09-4	11	alergia: arcoxia	ND/ND/ND	ND/ND/ND
09-4	12	alergia: diazepam	ND/ND/ND		Si
09-4	13	alergia: sintrom	ND/ND/ND		Si
09-4	14	alergia: tramadol	ND/ND/ND		Si
09-5	1	gota	20/05/2022		Si
09-5	2	Parada cardiorespiratoria	08/12/2022	22/12/2022
09-6	1	HTA	ND/ND/ND	ND/ND/ND
09-6	2	HALLAZGO INCIDENTAL DE TUMOR HIPOFISARIO	14/05/2019		Si
09-6	3	HORMONALMENTE: déficit tirotropo, gonatropo y muy probable corticotropo	ND/ND/ND	ND/ND/ND
09-6	4	dislipemia	ND/ND/ND	ND/ND/ND
09-7	1	HTA	10/10/2008		Si
09-7	2	ALÉRGICO CODÍNA	ND/ND/ND	ND/ND/ND
09-7	3	hepatopatía crónica origen oh + esteatosis hepática	10/10/2008		Si
09-7	4	GLAUCOMA OI. CATARAT E ISQUEMIA RETINIANA OD	ND/ND/ND		Si
09-7	5	PNP XONAL DE PREDOMINIO SENSITIVA	ND/ND/ND		Si
09-8	1	HTA	ND/ND/ND		Si
09-8	2	ACFA. FIBRILACION AURICULAR	05/11/2012		Si
09-8	3	NEOPLASIA CERVIX	03/09/2008	03/09/2008
09-8	4	HIPOTIROIDISMO SUBCLINICO AUTOINMUNE	23/02/2018		Si
09-8	5	EG BASSEDOW EN REMISIÓN DESDE 1990	ND/ND/1990		Si
09-8	6	HIPERPARATIROIDISMO PRIMARIO	09/11/2018		Si
09-8	7	OSTEOPOROSIS	09/11/2018		Si
09-8	8	PLAQUETOPENIA	ND/ND/2018		Si
09-9	1	HTA	ND/ND/ND	ND/ND/ND
09-9	2	DISLIPIDEMIA	ND/ND/ND	ND/ND/ND
09-9	3	PEQUEÑO ANEURISMA	ND/04/2022		Si
09-9	4	LUMBOCIATALGIA DERECHA	ND/ND/ND	ND/ND/ND
09-9	5	TRASTORNO DE IEDAS DELIRANTES	ND/ND/ND	ND/ND/ND
09-9	6	CÓLICOS RENALES Y BACTERIURIAS	ND/ND/2014	ND/ND/ND
09-9	7	GLAUCOMA	ND/ND/ND	ND/ND/ND
09-9	8	LINFANGIOMA CERVICAL DERECHO (1998), DOBLE J (2021)	ND/ND/ND	ND/ND/ND
09-9	9	Infección Clostridium Difficile	ND/12/2022	ND/12/2022
09-10	1	HTA EN TTO	ND/ND/ND		Si
09-10	2	DLP EN TTO	ND/ND/ND		Si
09-10	3	GOTA	ND/ND/2015	ND/ND/ND
09-10	4	ANTECEDENTES DE ACV	ND/ND/ND	ND/ND/ND
09-10	5	ERC 3b	ND/ND/2016	ND/ND/ND
09-10	6	IQ: colecistectomía. Amigdalectomía.	ND/ND/ND	ND/ND/ND
09-11	1	HTA	15/06/2001		Si
09-11	2	URTICARIA	01/12/2016	ND/ND/ND
09-11	3	DLP	ND/ND/ND	ND/ND/ND
09-11	4	ABSCESO SUBMAXILAR IZDO INTERVENIDA	ND/ND/2019	ND/ND/ND
09-11	5	ANEMIA FERROPÉNICA CRÓNICA	ND/ND/ND	ND/ND/ND
09-11	6	LEVE ATEROMATOSIS CAROTÍDEA BILATERAL SIN ESTENOSISHEMODINÁMICAMENTE SIGNIFICATIVAS	ND/ND/ND	ND/ND/ND
09-11	7	HIPOTIROIDISMO PRIMARIO	ND/ND/ND	ND/ND/ND
09-11	8	CTA AUTOINMUNE POR SD CREST	ND/ND/ND	ND/ND/ND
09-11	9	DIVERTICULITIS AGUDA PERFORADA	ND/10/2022	ND/ND/ND
09-11	10	diarre por CD	15/12/2022	25/12/2022
09-11	11	2 º episodio de CD	03/01/2023	14/01/2023
09-12	1	HDA (MELENAS) POR ANGIODISPLASIA DUODENAL	02/02/2023	14/02/2023
09-12	2	HTA	21/11/2018		Si
09-12	3	TROMBOCITEMIA	01/07/2009		Si
09-12	4	ERC crónica estadio 3 B (nefroangioesclerosis)	ND/ND/ND	ND/ND/ND
09-12	5	Hernias discales	01/08/2014		Si
09-12	6	DLP	ND/ND/ND	ND/ND/ND
09-12	7	HEMORRAGIA ALVEOLAR	ND/01/2020	ND/01/2020
09-12	8	MIOCARDIOPATIA	ND/ND/2021	ND/ND/2022
09-12	9	ULCERA AÓRTICA	ND/ND/ND	ND/ND/ND
09-12	10	DISFONIA	ND/ND/2017	ND/ND/2017
09-12	11	NODULILLO PULMONAR BENIGNO	ND/ND/ND	ND/ND/ND
09-12	12	COVID	01/02/2023	10/02/2023
09-13	1	HTA	01/05/2004		Si
09-13	2	ASMA	01/08/2009		Si
09-13	3	ADENOCARCINOMA RENAL GRADO BAJO.NEFRECTOMIA	05/01/2021	05/01/2021
09-13	4	FIBROSIS RETROPERITONEAL IGG4	ND/ND/2016		Si
09-13	5	Pancreatitis aguda de etiología no filiada	ND/06/2020		Si
09-13	6	Alérgico a metotrexate	ND/ND/ND	ND/ND/ND
09-13	7	alérgico Clindamicina	ND/ND/ND	ND/ND/ND
09-13	8	artroplasia rodrilla izq	ND/12/2022	ND/12/2022
09-13	9	diarrea	14/02/2023	14/02/2023
09-14	1	Pólipo pediculado	06/07/2016	06/07/2016
09-14	2	Pólipo endometrial	31/05/2016	31/05/2016
09-14	3	histerectomía total y doble anexectomía	15/11/2016	15/11/2016
09-14	4	reimplante ureteral bilateral tipo Boari	02/12/2016	02/12/2016
09-14	5	Fistula ureterovaginal bilateral	25/11/2016	25/11/2016
09-14	6	DIVERICULOSIS DE COLON	08/03/2018		Si
09-14	7	ERGE	12/03/2019		Si
09-14	8	SINDROME ADHERENCIAL	28/03/2022		Si
09-14	9	SINDROME GILBERT	28/03/2022		Si
09-14	10	ITUS REPETICIOÓN SECUNDARIAS	12/03/2019		Si
09-14	11	diarrea CD (+)	08/02/2023	17/02/2023
09-15	1	HIPERCOLESTEROLEMIA PURA	01/01/2013		Si
09-15	2	OTRA ANGINA DE PECHO Y ANGINA DE PECHO NEOM	01/04/2015	01/04/2015
09-15	3	HTA	01/03/2003		Si
09-15	4	DM TIPO II	07/02/2014		Si
09-15	5	ANGINA DE PECHO NEOM	28/07/2021	28/07/2021
09-15	6	Macroadenoma hipofisario	24/11/2022	24/11/2022
09-15	7	ISQUEMIA CRONICA DE EE.INFERIORES	09/03/2016		Si
09-15	8	ACFA ANTICOAGULADA	20/07/2018		Si
09-15	9	DLP EN TTO	ND/ND/ND		Si
09-15	10	ERC	ND/ND/ND		Si
09-15	11	diarrea por C DIFFICILE	12/03/2023		Si
09-16	1	HTA	24/04/2013		Si
09-16	2	DM TIPO II	29/04/2019		Si
09-16	3	OBESIDAD	01/10/1998		Si
09-16	4	SAOS muy severo en tratamiento con CPAP a 7cm H2O	25/08/2015		Si
09-16	5	ESTEANOSIS HEPÁTICA	18/12/2017		Si
09-16	6	HIDRADENITIS SUPURATIVA	ND/ND/1994		Si
09-17	1	Albinismo	ND/ND/ND	ND/ND/ND
09-17	2	Nistagmo horizontal congénito	ND/ND/ND	ND/ND/ND
09-17	3	cefaleas tensionales	14/03/2018		Si
09-17	4	prostatitis	ND/03/2020	ND/03/2020
09-17	5	prostatitis	ND/02/2023	ND/02/2023
09-17	6	prostatitis	23/03/2023	02/04/2023
09-17	7	hernia epigástrica	ND/ND/2017	ND/ND/2017
09-17	8	DIARREA POR C.DIFFICILE	ND/03/2023	ND/03/2023
09-18	1	Alergia a ácaros (Rinitis-Asma leve).	01/01/1999		Si
09-18	2	dislipemia mixta	01/08/2006		Si
09-18	3	HTA	01/04/2002		Si
09-18	4	Síndrome ansioso-depresivo	ND/ND/1997		Si
09-18	5	Hemorroides internas	ND/ND/ND	ND/ND/ND
09-18	6	Hígado graso no alcohólico.	01/05/2009		Si
09-18	7	SEPSIS SECUNDARIA A ITU	25/03/2023	29/03/2023
09-19	1	Carcinoma lobulillar Mulfifocal cT2N0	26/10/2020	ND/ND/2022
09-19	2	Alergia al polen y gramíneas	ND/ND/ND		Si
09-19	3	RAM a eterocoxib	ND/02/2019		Si
09-19	4	cirugia conservadora	21/09/2022	ND/09/2022
09-19	5	covid	29/05/2023	ND/ND/2023
09-19	6	candidiasis orofaríngea	16/06/2023	ND/ND/ND
09-19	7	otitis	ND/06/2023	ND/06/2023
09-19	8	hallux valgus (juanete)	ND/ND/ND	ND/ND/ND
09-19	9	carcinoma basocelular	ND/ND/ND	ND/ND/ND
09-19	10	cesárea	ND/ND/ND	ND/ND/ND
09-20	1	Dilatación aneurismática de raíz aórtica + IAo ligera-moderada con recambio valvular aórtico (prótesis aórtica mecánica)	ND/ND/2007	ND/ND/2007
09-20	2	Hemicolectomía derecha abierta por adenocarcinoma de colon , no afectación ganglionar. Dado de alta por no recidiva.	ND/03/2016	ND/12/2020
09-20	3	- Colecistopancreatitis con colecistectomía por laparotomía (AP colecistitis crónica).	02/04/2019	10/04/2019
09-20	4	SUBOCLUSION INTESTINAL	13/03/2023	17/03/2023
09-20	5	epidimitis aguda	ND/05/2023	ND/05/2023
09-20	6	Recidiva retroperitoneal en lecho quirúrgico con exéresis + interferón sin recidiva posterior.	ND/ND/1993	ND/ND/1993
09-20	7	Carcinoma urotelial in situ. pTis.	ND/05/2021	ND/02/2023
09-20	8	NEFROURETERECTOMÍA DERECHA	09/05/2023	13/05/2023
09-20	9	Carcinoma de células claras en riñón izquierdo con nefrectomía izquierda + esplenectomía	ND/ND/1986	ND/ND/1986
09-20	10	IQ fistula	21/05/2023	21/05/2023
09-20	11	HTA	ND/ND/ND		Si
09-20	12	anemia ferropenica	17/02/2015		Si
09-20	13	adenoma de prostata	16/05/2015		Si
09-20	14	dislipemia	17/02/2015		Si
09-21	1	hta	01/03/2015		Si
09-21	2	dlp	ND/ND/ND		Si
09-21	3	Hiperuricemia sin gota	ND/ND/ND	ND/ND/ND
09-21	4	EPOC leve 1A	20/01/2023		Si
09-21	5	linfoma del manto, estadio IV- A (afectación de médula ósea y gástrica)	ND/06/2017	ND/10/2017
09-21	6	TEP bilateral en contexto de linfoma + QT	ND/ND/2017	ND/ND/2017
09-21	7	COVID-19 con neumonía bilateral	ND/02/2022	ND/ND/ND
09-21	8	infección COVID con sobreinfección neumocócica.	10/01/2023	17/01/2023
09-21	9	ERC estadio 4 sin filiación etiológica	04/05/2020	07/06/2023
09-21	10	HBP I/II.	ND/12/2020	ND/12/2020
09-21	11	STUI con estenosis uretral bulbar.	ND/ND/ND	ND/ND/ND
09-21	12	Anillo fibroso de Schatski, gastritis crónica.	ND/ND/ND	ND/ND/ND
09-21	13	Intensa duodenitis,	ND/ND/ND	ND/ND/ND
09-21	14	Hipoacusia mixta	ND/ND/ND	ND/ND/ND
09-21	15	Hernia inguinal derecha	ND/ND/2012	ND/ND/2012
09-21	16	Cordales + quiste maxilofacial hace años (>30)	ND/ND/ND	ND/ND/ND
09-21	17	Tabique nasal	ND/ND/ND	ND/ND/ND
09-21	18	Uretrotomia interna	ND/ND/2021	ND/ND/2021
09-21	19	infección po C. Difficile	ND/ND/2018	ND/ND/2018
09-21	20	Infección poliomavirus bk	ND/ND/ND	ND/ND/ND
09-21	21	hematuria	ND/ND/ND	ND/ND/ND
09-21	22	gastroscopia	ND/ND/2017	ND/ND/2017
09-21	23	gonorrea	07/11/1963	ND/ND/ND
09-21	24	hipocondria	01/03/1994	ND/ND/ND
09-21	25	rotura de ligamento de rodilla	07/11/1963	ND/ND/ND
09-21	26	portador sonda foley	ND/ND/ND	ND/ND/ND
09-21	27	RAO (retención aguda de orina )	ND/ND/2020	ND/ND/2020
09-21	28	pólipos vesiculares/adenomiosis	ND/ND/2020	ND/ND/2020
09-21	29	doble ulcus duodenal.	ND/ND/ND	ND/ND/ND
09-22	1	obstrucción intestinal 2 ª hernia de Morgagni	07/03/2023	20/03/2023
09-22	2	Derrame pleural derecho subpulmonar postquirurgico	14/06/2023	23/06/2023
09-22	3	PANCOLITIS POR C. DIFFICILE EN RELACION A TOMA DE ATB	13/07/2023	17/07/2023
09-22	4	histerectomia	ND/ND/ND	ND/ND/ND
09-22	5	Necrosis grasa supradiafragmática derecha con buena evolución radiológica. Derrame subpulmonar derecho, aumento de volumen respecto al previo. Ver descripción	18/04/2023		Si
09-23	1	hta	01/10/2008		Si
09-23	2	FA paroxística	07/11/2011		Si
09-23	3	esteatosis hepatica dada de alta por digestivo	ND/ND/ND	ND/ND/ND
09-23	4	estenosis aórtica moderada	15/05/2023		Si
09-23	5	Rectorragia valorada por digestivo con gastro y colonoscopia diagnosticada de gastritis nodular crónica y diverticulosis pancolónica.	31/10/2022	31/10/2022
09-23	6	hernia de hiato	ND/ND/ND	ND/ND/ND
09-23	7	colecisitis agua y colangitis	19/09/2021	23/09/2021
09-23	8	cefalea tensional	ND/ND/ND	ND/ND/ND
09-23	9	Insuficiencia respiratoria tipo I, secundaria a bronquitis aguda de origen infeccioso.	ND/01/2023	ND/01/2023
09-23	10	iq; colecistectomia	16/02/2022	16/02/2022
09-23	11	iq: ligadura de trompas	ND/ND/ND	ND/ND/ND
09-24	1	dm tipo II	10/11/2008		Si
09-24	2	colon irritable	18/05/2004		Si
09-24	3	antecedentes de anemia ferropénica por metrorragias	ND/ND/ND	ND/ND/ND
09-24	4	hiperlipidemia mixta	21/04/2010		Si
09-24	5	adenoma tubulo- velloso con displasia epitelial de bajo grado	ND/ND/2022	ND/ND/2022
11-2	1	Enfermedad de Crohn	ND/ND/ND		Si
11-2	2	Déficit de vitamina B12	ND/ND/ND		Si
11-3	1	Sindrome depresivo	ND/ND/ND		Si
11-3	2	apendicectomia	ND/ND/ND	ND/ND/ND
11-3	3	fistula anal	ND/ND/ND	ND/ND/ND
11-3	4	Malla antiincontinencia urinaria	ND/ND/ND	ND/ND/ND
11-4	1	Amigdalectomia	ND/ND/ND	ND/ND/ND
11-4	2	Pielonefritis	28/12/2022	10/01/2023
11-4	3	Amenorrea	ND/ND/ND		Si
11-5	1	HTA	ND/ND/ND		Si
11-5	2	Osteoporosis	ND/ND/ND		Si
11-5	3	Sindrome ansioso-depresivo	ND/ND/ND		Si
11-5	4	Hipertiroidismo.	ND/05/2017		Si
11-5	5	Miocardiopatia dilatada.	ND/ND/ND		Si
11-5	6	Estenosis aortica moderada-severa	ND/ND/2021		Si
11-5	7	Fibrilación auricular permanente	ND/11/2017		Si
11-5	8	Insuficiencia cardiaca congestiva	ND/ND/2020		Si
11-5	9	Infección respiratoria de vias bajas	29/12/2022	ND/ND/ND
11-5	10	Infección por Clostridium	ND/03/2022	ND/ND/ND
11-6	1	Infecciones dentales	12/02/2023	04/03/2023
11-7	1	HTA	ND/ND/ND		Si
11-7	2	Dislipemia	ND/ND/ND		Si
11-7	3	Fibrilación auricular	ND/ND/ND		Si
11-7	4	Anemia ferropenica	ND/ND/2018		Si
11-8	1	HTA	ND/ND/ND		Si
11-8	2	DM tipo 2	ND/ND/ND		Si
11-8	3	Colitis ulcerosa	ND/ND/2003		Si
11-8	4	Dislipemia	ND/ND/ND		Si
11-8	5	Hipotiroidismo	ND/ND/ND		Si
11-8	6	Anemia	ND/ND/ND		Si
11-8	7	Hiperuricemia	ND/ND/ND		Si
11-8	8	Síndrome depresivo	ND/ND/ND		Si
11-8	9	Deficit B12	ND/ND/ND		Si
11-9	1	DM tipo2	ND/ND/ND		Si
11-9	2	Hiperlipemia	ND/ND/ND		Si
11-9	3	Poliartrosis	ND/ND/ND		Si
11-9	4	Ansiedad	ND/ND/ND		Si
11-10	1	hemorragia digestiva	ND/ND/1982	ND/ND/ND
11-10	2	hepatitis C	ND/ND/2022	ND/ND/ND
11-10	3	Infección por H. Pylori	ND/ND/ND		Si
11-10	4	Ferropenia	ND/ND/ND		Si
11-11	1	Infección tracto urinario	11/07/2023	ND/ND/ND
11-12	1	hiprrcolesterolemia	ND/ND/ND		Si
11-12	2	sindrome depresivo	ND/ND/ND		Si
12-1	1	NEUMONIA	12/11/2021	16/12/2021
12-1	2	DIARREA POR CLOSTRICIUM DIFFICILE	17/11/2021	17/01/2022
12-1	3	INFECCIÓN POR COVID	13/01/2022	23/01/2022
12-1	4	MICOSIS VAGINAL	24/11/2021	25/11/2021
12-1	5	MICOSIS ORAL	23/11/2021	29/11/2021
12-1	6	MICOSIS VAGINAL	14/01/2022	20/01/2022
12-1	7	MICOSIS ORAL	14/01/2022		Si
12-1	8	Edema de Reinke	ND/ND/2010	ND/ND/2010
12-1	9	DÉFICIT DE VITAMINA D	29/03/2022		Si
13-1	1	HTA	12/09/2014		Si
13-1	2	Enfermedad ateromatosa carotidea sin estenosis significativa	30/07/2004		Si
13-1	3	Dislipemia	30/07/2004		Si
13-1	4	Isquemia crónica de extremidades inferiores	ND/ND/ND		Si
13-1	5	Glaucoma	07/03/2016		Si
13-1	6	hernia inguinal derecha no complicada	11/05/2015		Si
13-1	7	Anemia por déficit de folatos	01/06/2010	ND/ND/ND
13-1	8	Trastorno adaptativo /Ansioso-depresivo	09/01/2015		Si
13-1	9	Incidentaloma suprarrenal bilateral	02/05/2017		Si
13-1	10	Espondiloartrosis	12/05/2017		Si
13-1	11	Hipotiroidismo subclínico	09/04/2019		Si
13-1	12	Trombosis esplenoportal	01/02/2023		Si
13-1	13	Otitis externa derecha	01/02/2023	ND/ND/ND
13-1	14	Dispepsia	31/03/2023	03/08/2023
13-1	15	Fractura de radio distal izquierdo	13/04/2023	ND/ND/ND
13-1	16	Amputación supracondílea derecha	05/05/2023		Si
13-1	17	Anemia ferropénica	27/07/2023		Si
13-1	18	Enfermedad por C. difficile	06/06/2023	ND/ND/ND
13-1	19	Recurrencia de enfermedad por C.difficile	01/08/2023	ND/ND/ND
13-1	20	Infección de piel postraumática (fístula)	08/08/2023	11/09/2023
13-1	21	Reparación quirúrgica de Luxación recidivante de hombro	13/06/2016	16/06/2016
13-1	22	Hernioplastia inguinal	ND/ND/2016	ND/ND/2016
16-1	1	Hipertensión	ND/ND/2020		Si
16-1	2	Accidente isquémico transitorio	ND/ND/2020	ND/ND/2020
16-1	3	Enfermedad Crohn ileal	ND/ND/2018		Si
16-1	4	Episodio de diarrea por Campylobacter	ND/05/2022	ND/ND/ND
16-1	5	Diarrea por Clostridium	01/06/2022	10/06/2022
17-1	1	Insuficiencia respiratoria	ND/02/2022		Si
17-2	1	enfermedad inflamatoria intestinal	ND/ND/2020		Si
17-2	2	gota	ND/ND/ND		Si
17-2	3	hipotiroidismo primario	ND/ND/2014		Si
17-2	4	dislipidemia	ND/ND/2016		Si
17-2	5	insuficiencia renal cronica	ND/ND/ND		Si
17-2	6	depresion	ND/ND/2012		Si
17-2	7	Hipertensión arterial	28/06/2004		Si
17-3	1	Obesidad	ND/01/2001		Si
17-3	2	hipertensión arterial	21/10/1998		Si
17-3	3	hipotiroidismo	13/10/1994		Si
17-3	4	diabetes mellitus	04/03/1999		Si
17-4	1	Enfermedad pulmonar obstructiva crónica	20/09/2013		Si
17-4	2	Enfermedad renal crónica	10/01/2018		Si
17-4	3	Flutter	02/12/2016		Si
17-4	4	Insuficiencia cardiaca	25/04/2022		Si
17-4	5	Diabetes mellitus tipo 2	24/09/2020		Si
17-4	6	Hiperuricemia	24/08/2009		Si
17-4	7	Estreñimiento	15/06/2022		Si
17-5	1	Hipertensión arterial	ND/09/2019		Si
17-5	2	Hipercolesterolemia	ND/02/2020		Si
17-5	3	Hipotiroidismo	ND/04/2014		Si
17-5	4	Niveles bajos de vitamina D	ND/02/2022		Si
17-5	5	Acidez	ND/01/2021		Si
17-5	6	Infección por Campylobacter	12/06/2021	15/06/2021
17-5	7	Infección por C.Difficile	10/02/2023	05/03/2023
17-5	8	Colitis linfocítica y colágena	ND/ND/2022		Si
17-6	1	Cardiopatía isquémica con angina	11/08/2015		Si
17-6	2	Edema	28/08/2017		Si
17-6	3	Estreñimiento	04/01/2023		Si
17-6	4	Hipertensión	ND/ND/2016		Si
17-6	5	Déficit de Vitamina D	ND/ND/2019		Si
17-6	6	Hipotiroidismo	ND/ND/2017		Si
17-6	7	Hipercolesterolemia	ND/ND/2018		Si
17-6	8	Diabetes tipo 2	ND/ND/2015		Si
17-6	9	Deterioro cognitivo	ND/12/2022		Si
17-6	10	Acidez	13/12/2016		Si
18-1	1	Fibrilación Auricular	15/10/2021		Si
18-1	2	SAOS LEVE	23/01/2022		Si
18-1	3	ICTUS ISQUEMICO	15/10/2021	21/10/2021
18-1	4	hipercolesterolemia	03/12/2013		Si
18-1	5	HIPERURICEMIA	15/01/2014		Si
18-1	6	BRONQUITIS ASMATICA	25/10/2014		Si
18-1	7	FERROPENIA	05/11/2021		Si
18-1	8	INSUFICIENCIA VENOSA CRONICA	ND/ND/2016		Si
18-1	9	obesidad	15/11/2021		Si
18-1	10	Insuficiencia respiratoria aguda por COVID	22/05/2022	01/06/2022
18-1	11	Insuficiencia cardiaca congestiva	02/08/2022		Si
18-1	12	herpes zoster	03/08/2022		Si
18-2	1	Insuficiencia cardiaca	09/12/2021		Si
18-2	2	Hipertension	25/07/2014		Si
18-2	3	Anemia	ND/ND/2008		Si
18-2	4	HIPONATREMIA	09/12/2021	14/12/2021
18-2	5	FIBRILACION AURICULAR	ND/ND/2021		Si
18-3	1	Hipertensión arterial	17/01/2021		Si
18-3	2	Asma bronquial	07/06/2016		Si
18-3	3	Fibromialgia	23/03/2015		Si
18-3	4	Hipotiroidismo	11/01/2016		Si
18-3	5	Polipectomía	07/05/2019	07/05/2019
18-3	6	Colecistectomía	07/05/2019	07/05/2019
20-1	1	Carcinoma neuroendocrino de célula pequeña	08/04/2022	23/08/2022
20-1	2	Hipertrofia Prostática	20/05/2022	23/08/2022
20-1	3	Herpes Zoster	06/08/2022	23/08/2022
20-1	4	Carcinoma microcítico de pulmón	01/04/2022	23/08/2022
20-1	5	Infección por Clostridium difficile	27/06/2022	06/07/2022
20-1	6	Aislamiento de Klebsiella oxytoca ampicilina R	06/08/2022	19/08/2022
20-2	1	diabetes mellitus tipo 2 insulindependiente con HbA1c > 10%	ND/06/2022		Si
20-2	2	Dislipemia	ND/ND/ND		Si
20-2	3	Disautonomía paraneoplásica	06/10/2022		Si
20-2	4	Carcinoma microcítico de pulmón con infiltración mediastínica y vascular	ND/06/2016		Si
20-2	5	Infección por Clostridium difficile	23/10/2022	30/10/2022
20-2	6	Infeccion urinaria por Kleibsella Oxytoca	11/12/2022	ND/ND/ND
21-1	1	Adenocarcinoma de prostata	ND/ND/2020		Si
21-1	2	Adenoma tubular con displasia de bajo grado	ND/ND/2010		Si
21-1	3	Dislipemia	ND/ND/2014		Si
21-1	4	ACxFA	ND/ND/2018		Si
21-1	5	Insuficiencia Renal Crónica	ND/ND/2018		Si
21-1	6	Artrosis	ND/ND/2015		Si
21-1	7	Estreñimiento	ND/ND/2019		Si
21-1	8	infección por Clostridium Difficile	04/11/2022	15/11/2022
21-2	1	Hipertensión	ND/ND/2016		Si
21-2	2	Dislipemia	ND/ND/2016		Si
21-2	3	Hiperuricemia	ND/ND/2017		Si
21-2	4	Obesidad	ND/ND/2005		Si
21-2	5	Bypass gástrico y hernioplastia umbilical	21/11/2022	21/11/2022
21-2	6	Insuficiencia Renal Aguda prerenal	29/12/2022	31/12/2022
21-3	1	Hipertrigliceridemia	ND/01/2022		Si
21-3	2	Colon irritable	ND/ND/1990		Si
21-3	3	Síndrome ansioso depresivo	ND/10/2022		Si
21-3	4	Deficit de Vitamina D	19/06/2023		Si
21-3	5	Folicopenia	19/06/2023		Si
21-4	1	Alergica Yodo	ND/ND/ND		Si
21-4	2	Alergia Sorbitol	ND/ND/ND		Si
21-4	3	ACxFA crónica	ND/ND/2018		Si
21-4	4	Hipertensión	ND/ND/2004		Si
21-4	5	Diverticulosis	ND/ND/2010		Si
21-4	6	Hipotiroidismo	ND/ND/2004		Si
21-4	7	Hemicolectomia	ND/ND/2014	ND/ND/2014
21-4	8	Colón Irritable	ND/ND/1990		Si
21-4	9	Dislipemia	ND/ND/2004		Si
21-4	10	Cirugía parotídea por tumor parotídeo	ND/ND/2022	26/08/2023

## Sheet: Medicación Previa
Nº de Paciente	Nº	Nombre genérico	¿Relacionado con la patología de estudio?	Dosis	Pauta	Ruta	Otra ruta	Fecha inicio	Fecha fin	Cont.
01-1	1	Apixabán	No	2.5 mg	bid	Oral		ND/ND/ND		Si
01-1	2	BISOPROLOL	No	2.5 mg	qd	Oral		ND/ND/ND		Si
01-1	3	FEROGRADUMET	No	105 mg	qd	Oral		ND/ND/ND		Si
01-1	4	REVINTY ellipta	No	184 mcg/22 mcg	qd	Inhalatoria		ND/ND/ND		Si
01-1	5	ATROVENT	No	20 mcg	q8h	Inhalatoria		ND/ND/ND		Si
01-1	6	dutasterida	No	0,5 mg/0,4 mg	qd	Oral		ND/ND/ND		Si
01-1	7	ranolazina	No	375 mg	qd	Oral		ND/ND/ND		Si
01-1	8	TRINISPRAY	No	0,4 mg / 0,05 ml	prn	Otra	PULVERIZACION SUBLINGUAL	ND/ND/ND		Si
01-1	9	Demilos	No	600 mg/1.000 UI	qd	Oral		ND/ND/ND		Si
01-1	10	Hidroferol	No	0,266 mg	mensual	Oral		ND/ND/ND		Si
01-1	11	OPTOVITE	No	1000 mcg	mensual	Oral		ND/ND/ND		Si
01-1	12	METFORMINA	No	425 mg	bid	Oral		ND/ND/ND		Si
01-1	13	OMEPRAZOL	No	20 mg	qd	Oral		ND/ND/ND		Si
01-1	14	PERINDOPRIL	No	2 mg	qd	Oral		ND/ND/ND		Si
01-1	15	UNIKET	No	40 mg	bid	Oral		ND/ND/ND		Si
01-1	16	MASDIL	No	60 mg	bid	Oral		ND/ND/ND		Si
01-1	17	hidroclorotiazida	No	12.5 mg	qd	Oral		ND/ND/ND		Si
01-1	18	ATORVASATINA	No	40 mg	qd	Oral		ND/ND/ND		Si
01-1	19	Ezetimiba	No	10 mg	qd	Oral		ND/ND/ND		Si
01-1	20	vancomicina	Sí	125 mg	qd	Oral		01/03/2021	06/03/2021
01-2	1	atorvastatina	No	20 MG	qd	Oral		ND/ND/2018		Si
01-3	1	amoxicilina clavulanico	No	desconocida	qd	Oral		23/05/2022	29/05/2022
01-3	2	melatonina	No	desconocida	qd	Oral		ND/ND/ND		Si
01-3	3	gineseda	No	unk	unk	Oral		20/07/2022		Si
01-3	4	omeprazol	No	20 mg	qd	Oral		ND/01/2018		Si
01-4	1	levocetirizina	No	5 mg	qd	Oral		ND/ND/ND		Si
01-4	2	candesartan	No	8 mg	qd	Oral		ND/ND/ND		Si
01-4	3	Hidroferol	No	0.266 mcg	cada 15 dias	Oral		ND/ND/ND		Si
01-6	1	alprazolam	No	0.5	qd	Oral		ND/ND/ND		Si
01-7	1	hydroferol	No	0.266 mg	UNA VEZ AL MES	Oral		ND/ND/ND		Si
01-7	2	tardyferon	No	247,25 mg	1 VEZ AL DÍA	Oral		ND/ND/ND		Si
01-7	3	TRAMADOL	No	37,5 MG	una vez al día, a demanda	Oral		ND/ND/ND		Si
01-7	4	Paracetamol	Sí	325 MG	una vez al día, a demanda	Oral		ND/ND/ND		Si
01-7	5	Timolol	No	1 gota	cada 12 horas	Oftalmológica		ND/ND/ND		Si
01-7	6	omeprazol	No	20 mg	ocasionalemente	Oral		23/12/2022	31/05/2023
01-7	7	fenofibrato	No	145 mg	uno al día	Oral		ND/ND/ND		Si
01-7	8	atorvastatina	No	40 mg	uno al día	Oral		ND/ND/ND		Si
01-7	9	Eutirox	No	88 MICROGRAMOS	uno al día	Oral		ND/ND/ND		Si
01-8	1	PERMIXON	No	160 mg	1 cápsula cada 8h	Oral		ND/ND/ND		Si
01-8	2	SERTRALINA	No	50 mg	1c/12h	Oral		ND/ND/ND		Si
01-8	3	LEXATIN	No	1,5 mg	1c/día	Oral		ND/ND/ND	ND/08/2023
01-8	4	ZOLPIDEM	No	5 mg	1 c/noche	Oral		ND/ND/ND		Si
01-8	5	Aripiprazol	No	5 mg	qd	Oral		15/08/2023		Si
03-1	1	Lercanidipino	No	10 mg	1-0-0	Oral		ND/ND/ND	ND/05/2022
03-1	2	Vancomicina	Sí	125 mg	1-1-1-1	Oral		01/05/2022	05/05/2022
03-1	3	Omeprazol	No	20 mg	1-0-0	Oral		ND/ND/ND	05/05/2022
03-2	1	Vancomicina	Sí	125 mg	1-1-1-1	Oral		09/07/2022	13/07/2022
03-3	1	Vancomicia	Sí	125 mg	1-1-1-1	Oral		17/01/2023	21/01/2023
03-4	1	Magnesium	No	53 mg	2-2-2	Oral		08/03/2023	21/03/2023
03-4	2	Vancomicina	Sí	125 mg	1-1-1-1	Oral		14/03/2023	18/03/2023
03-5	1	Advagraf	No	1.5 mg	1-0-0	Oral		ND/ND/ND	20/04/2023
03-5	2	Everolimus	No	1.5 mg	1-0-1	Oral		ND/ND/ND	20/04/2023
03-5	3	Enoxaparina	No	40mg	1-0-0	Intramuscular		19/04/2023	22/04/2023
03-5	4	Vancomicia	Sí	125 mg	1-1-1-1	Oral		16/04/2023	18/04/2023
04-1	1	vancomicina	Sí	125mg	cada 6 horas	Oral		15/10/2021	21/10/2021
04-1	2	metronidazol	Sí	500mg	8 horas	Oral		21/10/2021	22/10/2021
04-1	3	vancomicina	Sí	125mg	cada 6 horas	Oral		22/10/2021	29/10/2021
04-1	4	vancomicina	Sí	125mg	6 horas	Oral		14/01/2022	24/01/2022
05-1	1	Vancomicina	Sí	125 mg	c/6h	Oral		08/02/2023	12/02/2023
05-2	1	Pylera (subcitrato de bismuto potasio metronidazol clorhidrato de tetraciclina)	No	UNK	UNK	Oral		ND/01/2023	ND/ND/2023
05-2	2	Metronidazol	Sí	UNK	UNK	Oral		07/03/2023	26/03/2023
05-2	3	Vancomicina	Sí	125 mg	c/6h	Oral		19/04/2023	22/04/2023
05-2	4	Ultralevura	No	250 mg/dia	A demanda	Oral		07/10/2021	ND/ND/ND
06-2	1	Paracetamol	No	1 gramo	cada 8 horas si dolor	Oral		24/03/2021	21/04/2022
06-2	2	METAMIZOL Nolotil	No	575 mg	1 comp si no control del dolor con paracetamol	Oral		24/03/2022	21/04/2022
06-2	3	AMOXICILINA 875MG / CLAVULANICO 125MG	Sí	875 mg / 125 mg	8h/día	Oral		28/04/2022	12/05/2022
06-3	1	Vancomicina	Sí	desconocida	desconocida	Otra	desconocida	08/04/2022	10/04/2022
06-3	2	fidaxomicina pauta extendida 200 mg/12 h días 1 al 5, luego 200 mg/48 h del día 7 al 25	Sí	200 mg	200 mg/12 h días 1 al 5, luego 200 mg/48 h del día 7 al 25	Oral		10/04/2022	05/05/2022
06-5	1	Fidaxomicina	Sí	200mg	1/12	Oral		23/03/2023	03/04/2023
06-5	2	Vancomicina	Sí	125mg	6h	Oral		18/04/2023	25/04/2023
06-5	3	bezlotoxumab	Sí	775mg	1/24	Intravenosa		29/05/2023	ND/ND/ND
07-1	1	omeprazol	No	20 mg	cada 24 horas	Oral		13/03/2022	15/03/2022
07-1	2	Vancomicina	Sí	125 mg	cada 6 horas	Oral		12/03/2022	21/03/2022
07-2	1	Glacivlovir	No	900 mg	cuando infección de CMV. en junio 2020 y mayo 2022	Oral		ND/06/2020	ND/05/2022
07-2	2	azatioprina	No	100 mg	cada 24 horas	Oral		20/04/2022	09/05/2022
07-2	3	vancomicina	Sí	125 mg	cada 6 horas	Oral		06/05/2022	16/05/2022
07-2	4	Fidamoxicina	Sí	200 mg	cada 12 horas	Oral		19/05/2022	29/05/2022
07-2	5	bezlotoxumab	Sí	970 mg	dosis única	Intravenosa		27/05/2022	27/05/2022
07-2	6	tramadol	No	50 mg	cada 8 horas	Intravenosa		26/06/2022	27/06/2022
07-3	1	Golimumab	No	2mg	c/30 días	Otra	Pluma	25/04/2017	30/10/2017
07-3	2	Infliximab	No	250 mg	Dosis única	Intravenosa		02/10/2017	02/10/2017
07-3	3	Vedolizumab	No	300 mg	cada 14 dias	Intravenosa		28/03/2018	15/01/2019
07-3	4	Vancomicina	Sí	125mg	cada 6 hores	Intravenosa		15/01/2019	28/01/2019
07-3	5	fidaxomicina	Sí	no se tiene constancia	no se tiene constancia	Otra	no se tiene constancia	08/11/2021	18/11/2021
07-3	6	fidaxomicina	Sí	no se tiene constancia	no se tiene constancia	Otra	no se tiene constancia	07/11/2022	14/11/2022
07-3	7	Hierro IV	No	no se tiene constancia	no se tiene constancia	Otra	no se tiene constancia	ND/07/2018	ND/ND/ND
07-3	8	Vancomicina	Sí	125 mg	c/6 horas	Oral		04/01/2023	08/01/2023
07-4	1	Plasmalyte	No	500ml	cada 24 horas	Intravenosa		30/03/2023	31/03/2023
07-4	2	Suero glucosado 10%	No	500ml	/24h	Intravenosa		30/03/2023	01/04/2023
07-4	3	Vancomicina	Sí	125 mg	Cada 6 horas	Oral		25/01/2023	04/02/2023
07-4	4	Ciprofloxacino	No	400 mg	Cada 12 horas	Intravenosa		11/02/2023	13/02/2023
07-4	5	Vancomicina	No	1g	cada 12 horas	Intravenosa		07/04/2023	13/04/2023
07-4	6	Amoxicilina/ácido clavulánico	No	500 mg	cada 8 horas	Oral		13/04/2023	18/04/2023
07-5	1	bortezomib	No	según esquema VRD.	según esquema VRD.	Intravenosa		ND/02/2022	ND/03/2022
07-5	2	terapia con Inmunoglobulina IV	No	0.4 mg/kg	x 5 días	Intravenosa		06/04/2022	10/04/2022
07-5	3	Lenalidomida	No	25 mg	1 comprimidio diario del día 1 al 21 del ciclo durante 12 ciclos	Oral		07/02/2022	19/04/2023
07-5	4	Dexametasona	No	40 mg	40 mg días 1 a 4 y 9 a 12 del ciclo durante 12 ciclos	Oral		07/02/2022	19/04/2023
07-5	5	Amoxicilina-Clavulánico	No	875/125 mg	cada 8h	Intravenosa		05/06/2022	12/06/2022
07-5	6	Azitromicina	No	500 mg	cada 24 horas	Intravenosa		05/06/2022	07/06/2022
07-6	1	metronidazol	Sí	500 mg	cada 8 horas	Oral		25/04/2023	08/05/2023
07-6	2	vancominica	Sí	125 mg	cada 6 horas	Oral		22/05/2023	10/06/2023
08-3	1	vancomicina	Sí	125mg	cada 6h	Oral		27/12/2022	31/12/2022
08-5	1	moxifloxacino	No	400mg	cada24h	Oral		10/02/2022	05/01/2023
08-8	1	Vancomicina	Sí	125mg	cada 6 h	Oral		24/04/2023	02/05/2023
08-8	2	metropolol	No	ND	ND	Oral		ND/02/2021	ND/06/2021
08-8	3	oxibutinina	No	ND	ND	Oral		ND/04/2020	ND/04/2022
08-9	1	ciprofloxacino	Sí		cada 24h	Oral		01/04/2023	07/04/2023
08-14	1	subcitrato de bismuto potasio	No	140mg	24h	Oral		30/05/2023	08/06/2023
08-14	2	metronidazol	No	125mg	24h	Oral		30/05/2023	08/06/2023
08-14	3	clorhidrato de tetraciclina	No	125mg	24h	Oral		30/05/2023	08/06/2023
08-15	1	metronidazol	Sí	500mg	cada8h	Oral		19/07/2023	20/07/2023
08-15	2	Amoxicilina/ácido clavulánico	No	875 mg/125 mg	desconocida	Oral		26/06/2023	05/07/2023
09-4	1	vancomicina	Sí	DESCONOCIDO	DESCONOCIDO	Oral		28/05/2022	06/06/2022
09-4	2	omeprazol	No	20 mg	2 al dia	Oral		07/05/2012	01/07/2022
09-4	3	tinzaparina	No	0.5 ml	1 al día	Subcutánea		15/06/2022	01/07/2022
09-4	4	ensure plus	No	220 ml	1 al día	Oral		15/06/2022	02/07/2022
09-4	5	ceftriaxona	No	no hay dato	no hay dato	Otra	ND	09/03/2022	21/03/2022
09-4	6	Teicoplanina Accordpharma	No	no hay dato	no hay dato	Otra	ND	22/03/2022	31/03/2022
09-4	7	ertapenem	No	no hay dato	no hay dato	Otra	ND	24/03/2022	31/03/2022
09-4	8	clindamicina	No	no hay dato	no hay dato	Otra	ND	08/04/2022	19/04/2022
09-5	1	omeprazol	No	20 mg	1 al dia	Oral		08/12/2022	16/12/2022
09-6	1	MIRTAZAPINA	No	15 MG	1 AL DIA	Oral		11/09/2017	12/01/2023
09-6	2	ciprofloxacino	No	500 mg	cada 12h	Oral		06/06/2022	13/06/2022
09-6	3	metamizol	No	desconocido	desconocido	Oral		06/06/2022	13/06/2022
09-6	4	prednisona	No	30mg	desconocido	Oral		13/12/2022	18/12/2022
09-6	5	sprectraceff	No	desconocido	cad 12 horas	Oral		13/12/2022	19/12/2022
09-6	6	vancomicina	Sí	desconocido	desconocido	Oral		20/12/2022	20/12/2022
09-8	1	Calcio, pidolato/Colecalciferol (vitamina D3)	No	600 mg	cada 12 h	Oral		04/04/2018	12/01/2023
09-8	2	Atorvastatina	No	10 mg	1 al día	Oral		29/03/2012	03/03/2023
09-8	3	Levotiroxina sódica	No	75 mcg	1 al día	Oral		07/10/2022	05/01/2023
09-8	4	Calcifediol	No	266 mcg	1 mensual	Oral		09/11/2018	12/01/2023
09-8	5	Denosumab	No	60 mg	1 semestral	Subcutánea		04/04/2018	12/01/2023
09-8	6	Acenocumarol	No	4 mg	según control analitico de INR	Oral		22/03/2012	10/02/2023
09-9	1	FERROSO SULFATO	No	80 MG	1 AL DÍA	Oral		18/02/2022	01/02/2023
09-9	2	PREGABALINA	No	25 MG	1 AL DÍA	Oral		06/10/2021	01/02/2023
09-9	3	METILPREDNISOLONA, ACEPONATO DE	No	60 g	2 cada 12 h	Tópica		31/10/2022	19/12/2022
09-9	4	Vancomicina	Sí	desconocido	desconocido	Otra	ND	ND/ND/ND	ND/ND/ND
09-10	1	ESCITALOPRAM	No	10 MG	1 AL DIA	Oral		20/11/2014	30/01/2023
09-10	2	LATANOPROST	No	0.2 ML	1 AL DIA	Oftalmológica		19/10/2022	19/06/2023
09-10	3	FEBUXOSTAT	No	80 MG	48 HORAS	Oral		28/07/2015	30/01/2023
09-10	4	pantoprazol	No	40 mg	1 al dia	Oral		14/06/2012	26/01/2023
09-10	5	PARACETAMOL	No	1 g	CADA 8 HORAS	Oral		24/01/2023	26/01/2023
09-11	1	CALCIO CARBONATO, COLECALCIFEROL	No	600 MG	1 AL DÍA	Oral		28/04/2022		Si
09-11	2	FÉRRICO PROTEINSUCCINILATO	No	40 MG	1 AL DÍA	Oral		30/01/2023		Si
09-11	3	ESPIRONOLACTONA	No	25 MG	1 AL DÍA	Oral		05/12/2022		Si
09-11	4	ENALAPRIL	No	5 MG	1 AL DÍA	Oral		18/02/2020		Si
09-11	5	ATORVASTATINA	No	10 MG	1 AL DÍA	Oral		11/02/2020		Si
09-11	6	LEVOTIROXINA SÓDICA	No	75 MG	1 AL DÍA	Oral		05/12/2022		Si
09-11	7	LORAZEPAM	No	1 MG	1 AL DÍA	Oral		14/12/2020		Si
09-11	8	PROTEPLUS NM NEUTRO	No	20 G	2 AL DÍA	Oral		03/01/2023		Si
09-11	9	DENOSUMAB	No	60 MG	SEMESTRAL	Subcutánea		28/04/2022		Si
09-11	10	vancomicina	Sí	125 mg	1 comprimido cada 6 h	Oral		15/12/2022	25/12/2022
09-11	11	DIFICLIR ( fidaxomicina)	Sí	200 mg	cada 12 h	Oral		04/01/2023	14/01/2023
09-12	1	enalapril	No	10 mg	2 al día	Oral		23/03/2020	10/03/2023
09-12	2	alopurinol	No	100 mg	1al día	Oral		24/10/2022	21/01/2023
09-12	3	empaglifozina	No	10 mg	1 al día	Oral		13/05/2022	16/03/2023
09-12	4	filgrastim ( accofil)	Sí	300 mcg	1 dosis	Subcutánea		10/02/2023	10/02/2023
09-12	5	Hidroxicarbamida	No	1000 mg	1 al dia	Oral		08/02/2023	11/02/2023
09-12	6	vancomicina	Sí	125 mg	cada 6 horas	Oral		09/02/2023	11/02/2023
09-13	1	Linezolid Demo	No	600 mg	2 al dia	Oral		08/02/2023	20/02/2023
09-13	2	Micofenolato de mofetilo	No	360 mg	2 al dia	Oral		ND/ND/ND	ND/ND/ND
09-14	1	METRONIDAZOL	Sí	500mg	cada 8h	Oral		08/02/2023	17/02/2023
09-15	1	vancomicina	Sí	125 mg	cada 6 horas	Oral		13/03/2023	15/03/2023
09-15	2	Omeprazol	No	20 mg	1 al dia	Oral		03/01/2012	13/03/2023
09-17	1	metronidazol	Sí	250 mg	2 cada 8 horas	Oral		14/04/2023	23/04/2023
09-17	2	cefixima	No	400 mg	a al dia	Oral		23/03/2023	01/04/2023
09-19	1	Nistatina (MYCOSTATIN)	No	1 ml	cada 8 h	Oral		16/03/2022	20/06/2023
09-19	2	vancomicina	Sí	125 mg	cada 6 horas	Oral		16/06/2023	19/06/2023
09-19	3	nirmatrelvir + ritonavir	No	desconocido	desconocido	Intravenosa		29/05/2023	02/06/2023
09-19	4	radioterapia adyuvante 29G	No	29 GY 5 F	dos dias	Intravenosa		07/11/2022	11/11/2022
09-19	5	quimioterapia neoadyuvante con carbo-taxol	No	4 de carbo / 12 taxol	cada 7 dias	Intravenosa		31/03/2022	16/06/2022
09-19	6	ACdd	No	4	cada 2 semanas	Intravenosa		23/06/2022	18/08/2022
09-19	7	XELODA	No	1650 mg	cada 12 h	Intravenosa		05/12/2022	04/05/2023
09-19	8	amoxicilina/ácido clavulánico	No	desconocido	desconocido	Oral		ND/06/2023	ND/06/2023
09-20	1	cefixima	No	200 mg	1 al día	Oral		22/05/2023	05/06/2023
09-20	2	Hidrogenocarbonato de sodio	No	1 g	2 al dia	Oral		28/03/2023	01/07/2023
09-20	3	enoxaparina	No	40 mg	1 cada 12 h	Subcutánea		03/04/2023	07/04/2023
09-20	4	enoxaparina	No	60 mg	1 al dia	Subcutánea		24/04/2023	27/04/2023
09-20	5	enoxaparina	No	60 mg	1 al dia	Subcutánea		04/05/2023	06/05/2023
09-20	6	enoxaparina	No	40 mg	1 al dia	Subcutánea		17/05/2023	18/05/2023
09-21	1	R-CHOP/R	No	desconocido	DESCONOCIDO	Otra	desconocido	ND/06/2017	ND/10/2017
09-21	2	DHAP	No	DESCONOCIDO	DESCONOCIDO	Otra	desconocido	ND/06/2017	ND/06/2017
09-21	3	MabThera	No	desconocido	desconocido	Intravenosa		02/07/2018	ND/02/2021
09-22	1	cefditoreno (MEIACT)	No	400 mg	1 cada 12 h	Oral		14/06/2023	23/06/2023
09-22	2	amoxicilina/ácido clavulánico augmentine)	No	2 g	1 al dia	Intravenosa		15/03/2023	15/03/2023
09-23	1	centella asiatica	No	60 g	cada 72 h	Tópica		15/01/2020	30/08/2023
09-23	2	amoxicilina	No	750 mg	cada 8 h	Oral		24/08/2023	29/08/2023
09-23	3	prednisona	No	30 mg	cada 24h	Oral		24/08/2023	28/08/2023
09-23	4	mirtazapina	No	15 mg	1 al dia	Oral		24/03/2023	30/08/2023
09-23	5	Combiprasal (sab+ipra)	No	cada 8 h	2.5/0.5mg	Inhalatoria		05/09/2023	07/09/2023
11-3	1	Amoxicilina clavulanico	Sí	875/125 mg	Cada 8 h	Oral		ND/12/2022	ND/ND/ND
11-3	2	Fosfomicina trometamol	Sí	3 gr	Dosis unica	Oral		ND/12/2022	ND/ND/ND
11-4	1	ceftriaxona	Sí	2 gr	cada 24h	Intravenosa		28/12/2022	10/01/2023
11-5	1	ceftriaxona	Sí	2 gr	cada 24h	Intravenosa		29/12/2022	04/01/2023
11-5	2	cefixima	Sí	400 mg	cada 24h	Oral		04/01/2023	07/01/2023
11-6	1	amoxicilina - acido clavulanico 875/125 mg	Sí	1 comp (875/125 mg) cada 8 horas	cada 8 horas	Oral		12/02/2023	04/03/2023
11-6	2	Omeprazol 20 mg	Sí	20 mg	1 comp cada 24h	Oral		10/03/2023	17/03/2023
11-7	1	vancomicina	Sí	125 mg	6h	Oral		06/05/2023	09/05/2023
11-7	2	Amoxicilina	Sí	1 gr	12h	Oral		08/03/2023	21/03/2023
11-7	3	Claritromicina	Sí	500 mg	1 comp cada 12h	Oral		08/03/2023	21/03/2023
11-7	4	Metronidazol	Sí	250 mg	2 comp cada 12h	Oral		08/03/2023	21/03/2023
11-8	1	Amoxicilina - clavulanico 875/125	No	875/125 mg	1 comp cada 8 horas	Oral		04/05/2023	08/05/2023
11-8	2	vancomicina	Sí	125 mg	6h	Oral		26/05/2023	29/05/2023
11-9	1	piperacilina - tazobactam	Sí	4 gr/500 mg	cada 8h	Intravenosa		12/05/2023	19/05/2023
11-9	2	vancomicina	Sí	125 mg	cada 6h	Oral		12/07/2023	15/07/2023
11-10	1	amoxicilina	Sí	1gr	cada 12h	Oral		20/06/2023	03/07/2023
11-10	2	claritromicina	Sí	500 mg	cada 12h	Oral		20/06/2023	03/07/2023
11-10	3	metronidazol	Sí	500 mg	cada 12h	Oral		20/06/2023	03/07/2023
11-10	4	Rabeprazol	Sí	20 mg	Cada 12h	Oral		ND/ND/ND	28/07/2023
11-11	1	fosfomicina trometamol	Sí	3 gr	1 sobre cada 48 h (durante 2 dias)	Oral		09/07/2023	11/07/2023
11-11	2	vancomicina	Sí	125 mg	1 capsula cada 6h	Oral		04/08/2023	06/08/2023
11-11	3	Ciprofloxacino	No	500 mg	12h	Oral		03/08/2023	04/08/2023
11-12	1	vancomicina	Sí	125 mg	cada 6h	Oral		23/08/2023	26/08/2023
11-12	2	amoxicilina/clavulanico	Sí	875/125 mg	1 comp cada 8h	Oral		01/08/2023	07/08/2023
12-1	1	NISTATINA 100000UI/ML SUSPENSION 60 ML	No	5 ML	DOS VECES AL DIA	Oral		23/03/2022	18/09/2022
12-1	2	NISTATINA 100000UI/ML SUSPENSION 60 ML	No	5 ML	DESAYUNO-COMIDA-CENA	Oral		23/11/2021	29/11/2021
12-1	3	COTRIMAZOL 500MG COMPRIMIDO VAGINAL	No	500MG	UNICA	Otra	VAGINAL	24/11/2021	24/11/2021
12-1	4	COTRIMAZOL 100MG, 6 COMPRIMIDOS VAGINALES	No	100MG	UNO AL DÍA	Otra	VAGINAL	17/01/2022	21/01/2022
12-1	5	AMOXICILINA /CLAVULÁNICO 875/125 MG	Sí	875/125	CADA 8 HORAS	Oral		12/11/2021	18/11/2021
12-1	6	METRONIDAZOL 250MG	Sí	500MG	CADA 8 HORAS	Oral		16/12/2021	29/12/2021
13-1	1	Famotidina	No	40 mg	1 com / 24h	Oral		21/07/2023	03/08/2023
13-1	2	Tobramicina 3mg/ml	No	1 gota	cada 24h	Ótica		17/08/2023	26/08/2023
13-1	3	LEXXEMA (METILPREDNISOLONA ACEPONATO)	No	1MG/1G	1 APLICACION /24 HORAS	Tópica		17/08/2023	26/08/2023
16-1	1	Adalimumab	No	40 mg	c/ 14 dias	Intravenosa		ND/09/2021	17/06/2022
16-1	2	vancomicina	Sí	125 mg	c/6h	Oral		01/06/2022	10/06/2022
16-1	3	vancomicina	Sí	125 mg	c/6h	Oral		17/06/2022	19/06/2022
17-5	1	Azitromicina	No	500mg	Una vez al día	Oral		12/06/2021	15/06/2021
17-5	2	Vancomicina	No	125mg	Cada 6 horas	Oral		15/02/2023	25/02/2023
17-5	3	Budesonida	No	Desconocida	Desconocida	Oral		ND/ND/2023	ND/ND/2023
17-5	4	Budesonida	No	Desconocida	Desconocida	Oral		ND/ND/2022	ND/ND/2022
18-1	1	omeprazol	No	20mg	diario	Oral		20/10/2021	11/10/2022
18-1	2	Moxifloxacino	Sí	400 mg	diaria	Oral		26/09/2022	03/10/2022
18-1	3	dacortin	No	30 mg	diaria	Oral		26/09/2022	01/10/2022
18-1	4	Ceftriaxona	No	2G	DAILY	Intravenosa		10/10/2022	11/10/2022
18-2	1	ceftriaxona	No	2g	dia	Intravenosa		24/01/2023	26/01/2023
18-2	2	cefixima	No	400 mg	diario	Oral		12/01/2023	21/01/2023
18-3	1	ciprofloxacino	Sí	500mg	2 dosis	Oral		30/01/2023	31/01/2023
20-1	1	Metamizol	No	575mg	tres veces al día	Intravenosa		06/08/2022	07/08/2022
20-1	2	Ferrogradument	No	105 mg	Una vez al día	Oral		29/07/2022	06/08/2022
20-1	3	Vancomicina	Sí	125 mg	Cada 6 horas	Oral		08/08/2022	10/08/2022
20-1	4	Piperaciclina-Tazobactam	No	4 g	cada 6 horas	Intravenosa		06/08/2022	10/08/2022
20-1	5	Ringer Lactato	No	1000 mL	Cada 2 horas	Intravenosa		06/08/2022	07/08/2022
20-1	6	Pantoprazol	No	40 mg	Una vez al día	Intravenosa		06/08/2022	12/08/2022
20-1	7	Vancomicina	Sí	125	mg	Oral		28/06/2022	06/07/2022
20-2	1	Bemiparina	No	3500 UI	Diaria	Subcutánea		28/11/2022	10/12/2022
20-2	2	Metoclopramida	No	10 mg	3 veces al dia	Intravenosa		28/11/2022	10/12/2022
20-2	3	Vancomicina	Sí	125 mg	Cada 6 horas	Oral		10/12/2022	12/12/2022
20-2	4	Pantoprazol	No	40 mg	cada 24 horas	Intravenosa		28/11/2022	01/12/2022
20-2	5	Filgrastim	No	30 mg	Cada 24 horas	Subcutánea		09/12/2022	11/12/2022
20-2	6	Insulina	No	1 UI	Cada 8 horas	Subcutánea		09/12/2022	12/12/2022
20-2	7	Macrogol	No	13.8 g	2 veces al dia, si precisa por estreñimiento	Oral		02/12/2022	10/12/2022
20-2	8	Potasio 10 mEq + Glucosa 5%	No	500 ml	cada 12 horas	Intravenosa		28/11/2022	11/12/2022
21-1	1	Vancomicina	Sí	125mg	Cada 6h	Oral		09/12/2022	14/12/2022
21-1	2	Pantoprazol	No	40mg	Cada 24h	Intravenosa		09/12/2022	14/12/2022
21-2	1	Pantoprazol	No	40mg	cada 24h	Intravenosa		29/12/2022	02/01/2023
21-2	2	Vancomicina	Sí	125mg	Cada 6h	Oral		30/12/2022	03/01/2023
21-3	1	Vancomicina	Sí	125mg	Cada 6h	Oral		14/06/2023	19/06/2023
21-4	1	Bisoprolol	No	2.5mg	Cada 24h	Oral		ND/ND/ND	04/09/2023
21-4	2	Paracetamol	No	1g	Cada 8h	Oral		26/08/2023	31/08/2023
21-4	3	Enantyum	No	25mg	Cada 8h	Oral		26/08/2023	31/08/2023
21-4	4	Augmentine	No	875/125mg	Cada 8h	Oral		26/08/2023	31/08/2023
21-4	5	Vancomicina	Sí	125mg	Cada 6 horas	Oral		02/09/2023	06/09/2023
21-4	6	piperazilina tazobactam	No	4/500	cada 8 horas	Oral		ND/09/2023	01/09/2023
11-8	9	levotiroxina 75 mcg	No	75 mcg	1 comp cada 24h	Oral		ND/ND/ND		Sí
11-8	10	alopurinol 100 mg	No	100 mg	1 comp cada 24h	Oral		ND/ND/ND		Sí
11-8	11	Ketazolam 30 mg	No	30 mg	1 comp cada 24h	Oral		ND/ND/ND		Sí
11-8	12	Paroxetina 20 mg	No	20 mg	1 comp cada 24h	Oral		ND/ND/ND		Sí
11-8	13	Ebastina 20 mg	No	20 mg	1 comp cada 24h	Oral		ND/ND/ND		Sí
11-8	14	Vitamina B12	No	1000 mcg	1 inyección mensual	Intramuscular		ND/ND/ND		Sí
11-8	15	Amoxicilina - clavulanico 875/125	No	875/125 mg	1 comp cada 8 horas	Oral		04/05/2023	08/05/2023	No
11-8	16	vancomicina	Sí	125 mg	6h	Oral		26/05/2023	29/05/2023	No
11-9	1	piperacilina - tazobactam	Sí	4 gr/500 mg	cada 8h	Intravenosa		12/05/2023	19/05/2023	No
11-9	2	vancomicina	Sí	125 mg	cada 6h	Oral		12/07/2023	15/07/2023	No
11-10	1	amoxicilina	Sí	1gr	cada 12h	Oral		20/06/2023	03/07/2023	No
11-10	2	claritromicina	Sí	500 mg	cada 12h	Oral		20/06/2023	03/07/2023	No
11-10	3	metronidazol	Sí	500 mg	cada 12h	Oral		20/06/2023	03/07/2023	No
11-11	1	fosfomicina trometamol	Sí	3 gr	1 sobre cada 48 h (durante 2 dias)	Oral		09/07/2023	11/07/2023	No
11-11	2	vancomicina	Sí	125 mg	1 capsula cada 6h	Oral		04/08/2023	06/08/2023	No
11-11	3	Ciprofloxacino	No	500 mg	12h	Oral		03/08/2023	04/08/2023	No
11-12	1	vancomicina	Sí	125 mg	cada 6h	Oral		23/08/2023	26/08/2023	No
11-12	2	amoxicilina/clavulanico	Sí	875/125 mg	1 comp cada 8h	Oral		01/08/2023	07/08/2023	No
12-1	1	NISTATINA 100000UI/ML SUSPENSION 60 ML	No	5 ML	DOS VECES AL DIA	Oral		23/03/2022	18/09/2022	No
12-1	2	NISTATINA 100000UI/ML SUSPENSION 60 ML	No	5 ML	DESAYUNO-COMIDA-CENA	Oral		23/11/2021	29/11/2021	No
12-1	3	COTRIMAZOL 500MG COMPRIMIDO VAGINAL	No	500MG	UNICA	Otra	VAGINAL	24/11/2021	24/11/2021	No
12-1	4	COTRIMAZOL 100MG, 6 COMPRIMIDOS VAGINALES	No	100MG	UNO AL DÍA	Otra	VAGINAL	17/01/2022	21/01/2022	No
12-1	5	AMOXICILINA /CLAVULÁNICO 875/125 MG	Sí	875/125	CADA 8 HORAS	Oral		12/11/2021	18/11/2021	No
12-1	6	METRONIDAZOL 250MG	Sí	500MG	CADA 8 HORAS	Oral		16/12/2021	29/12/2021	No
13-1	1	OLMESARTAN MEDOXOMILO/HIDROCLOROTIAZIDA	No	40MG/25MG	1 comp c/ 24 horas	Oral		02/12/2020		Sí
13-1	2	INNOHEP 10.000 UI ANTI-XA/0,5 ML SOLUCIÓN INYECTABLE JERINGA PRECARGADA 0,5ML	No	10.000 UI	1 cada 24 horas	Subcutánea		10/03/2023	ND/ND/ND	No
13-1	3	CINITAPRIDA	No	1 MG	3 COMP/ 24 HORAS	Oral		21/07/2023		Sí
13-1	4	; LORMETAZEPAM	No	2 MG	1 COMP/ 24 HORAS	Oral		09/01/2015		Sí
13-1	5	LIPOCOMB (ROSUVASTATINA/EZETIMIBA) 10/10MG	No	10/10MG	1 COMP/24HORAS	Oral		19/11/2018		Sí
13-1	6	ACIDO FOLICO	No	5 MG	1 COMP/24 HORAS	Oral		27/07/2023		Sí
13-1	7	PANTOPRAZOL	No	40MG	1 COMP/ 24 HORAS	Oral		02/12/2016		Sí
13-1	8	PARACETAMOL	No	1 GRAMO	1COMP / 8 HORAS	Oral		11/11/2022		Sí
13-1	9	HIERRO GLICINA SULFATO	No	100MG	1 CAP/ 24 HORAS	Oral		27/07/2023		Sí
13-1	10	LUMIGAN 0,1MG/ML (BIMATOPROST)	No	0,1MG/ML	1 gota c/24 horas	Ótica		26/12/2013		Sí
13-1	11	NOLOTIL (METAMIZOL MAGNESICO)	No	575MG 20 CAPSULAS	1 CAP/ 8 HORAS	Oral		11/05/2015		Sí
13-1	12	CYMBALTA (DULOXETINA)	No	30 MG	1 CAP/ 24 HORAS	Oral		10/05/2022		Sí
13-1	13	LYRICA (PREGABALINA)	No	50 MG	1/ 24 HORAS	Oral		23/12/2022		Sí
13-1	14	PALEXIA RETARD (TAPENTADOL)	No	50MG	1/ 24 HORAS	Oral		11/04/2023		Sí
13-1	15	; DUOPLAVIN 75/100MG (CLOPIDOGREL/ ACIDO ACETIL SALICILICO	No	75/100MG	1 / 24 HORAS	Oral		21/11/2019		Sí
13-1	16	PALEXIA RETARD 25 MG (TAPENTADOL)	No	25 MG	1 COMP/24 HORAS	Oral		21/04/2022		Sí
16-1	1	Adalimumab	No	40 mg	c/ 14 dias	Intravenosa		ND/09/2021	17/06/2022	No
16-1	2	vancomicina	Sí	125 mg	c/6h	Oral		01/06/2022	10/06/2022	No
16-1	3	vancomicina	Sí	125 mg	c/6h	Oral		17/06/2022	19/06/2022	No
17-1	1	Budesonida	No	200	1-0-1	Inhalatoria		ND/02/2022		Sí
17-1	2	Bromuro ipratropio	No	20 ug	1-0-1	Inhalatoria		ND/02/2022		Sí
17-5	1	Azitromicina	No	500mg	Una vez al día	Oral		12/06/2021	15/06/2021	No
17-5	2	Vancomicina	No	125mg	Cada 6 horas	Oral		15/02/2023	25/02/2023	No
17-5	3	Budesonida	No	Desconocida	Desconocida	Oral		ND/ND/2023	ND/ND/2023	No
17-5	4	Budesonida	No	Desconocida	Desconocida	Oral		ND/ND/2022	ND/ND/2022	No
18-1	1	omeprazol	No	20mg	diario	Oral		20/10/2021	11/10/2022	No
18-1	2	Moxifloxacino	Sí	400 mg	diaria	Oral		26/09/2022	03/10/2022	No
18-1	3	dacortin	No	30 mg	diaria	Oral		26/09/2022	01/10/2022	No
18-2	1	ceftriaxona	No	2g	dia	Intravenosa		24/01/2023	26/01/2023	No
18-2	2	cefixima	No	400 mg	diario	Oral		12/01/2023	21/01/2023	No
18-3	1	ciprofloxacino	Sí	500mg	2 dosis	Oral		30/01/2023	31/01/2023	No
20-1	1	Duodart	No	0.5mg/0.4mcg	diaria	Oral		15/05/2022		Sí
20-1	2	Metamizol	No	575mg	tres veces al día	Intravenosa		06/08/2022	07/08/2022	No
20-1	3	Ferrogradument	No	105 mg	Una vez al día	Oral		29/07/2022	06/08/2022	No
20-1	4	Vancomicina	Sí	125 mg	Cada 6 horas	Oral		08/08/2022	10/08/2022	No
20-1	5	Piperaciclina-Tazobactam	No	4 g	cada 6 horas	Intravenosa		06/08/2022	10/08/2022	No
20-1	6	Ringer Lactato	No	1000 mL	Cada 2 horas	Intravenosa		06/08/2022	07/08/2022	No
20-2	1	Bemiparina	No	3500 UI	Diaria	Subcutánea		28/11/2022	10/12/2022	No
20-2	2	Metoclopramida	No	10 mg	3 veces al dia	Intravenosa		28/11/2022	10/12/2022	No
20-2	3	Vancomicina	Sí	125 mg	Cada 6 horas	Oral		10/12/2022	12/12/2022	No
20-2	4	Pantoprazol	No	40 mg	cada 24 horas	Intravenosa		28/11/2022	01/12/2022	No
20-2	5	Filgrastim	No	30 MUI	Cada 24 horas	Subcutánea		09/12/2022	12/12/2022	No
20-2	6	Insulina	No	1 UI	Cada 8 horas	Subcutánea		09/12/2022	12/12/2022	No
20-2	7	Macrogol	No	13.8 g	2 veces al dia, si precisa por estreñimiento	Oral		02/12/2022	10/12/2022	No
20-2	8	Potasio 10 mEq + Glucosa 5%	No	500 ml	cada 12 horas	Intravenosa		28/11/2022	11/12/2022	No
21-1	1	Apixaban	No	2.5mg	Cada 12h	Oral		ND/ND/2018		Sí
21-1	2	Bisoprolol (Emconcor)	No	2.5mg	Cada 24h	Oral		ND/ND/2018		Sí
21-1	3	Zaldiar (Tramadol/Paracetamol)	No	325/37.5mg	Si precisa	Oral		ND/ND/2017		Sí
21-1	4	Paracetamol	No	500mg	Cada 8h	Oral		ND/ND/2017		Sí
21-1	5	Simvastatina	No	10mg	Cada 24h	Oral		ND/ND/2014		Sí
21-1	6	Plantago	No	1 sobre	Cada 24h	Oral		ND/ND/2019		Sí
21-1	7	Vancomicina	Sí	125mg	Cada 6h	Oral		09/12/2022	14/12/2022	No
21-2	1	Losartan	No	100mg	Cada 24h	Oral		ND/ND/2016		Sí
21-2	2	Amlodipino	No	10mg	Cada 24h	Oral		ND/ND/2019		Sí
21-2	3	Alopurinol	No	100mg	Cada 24h	Oral		ND/ND/2017		Sí
21-2	4	Atorvastatina	No	20mg	Cada 24h	Oral		ND/ND/2016		Sí
21-2	5	Pantoprazol	No	40mg	cada 24h	Intravenosa		29/12/2022	02/01/2023	No
21-2	6	Vancomicina	Sí	125mg	Cada 6h	Oral		30/12/2022	03/01/2023	No
21-3	1	Omeprazol	No	40 mg	a demanda	Oral		ND/ND/2015		Sí
21-3	2	Fenifibrato	No	145 mg	Diario	Oral		ND/04/2023		Sí
21-3	3	Mirtazapina	No	45 mg	Diaria	Oral		ND/10/2022		Sí
21-3	4	Diazepam	No	5mg	si precisa	Oral		ND/10/2022		Sí
21-3	5	Vancomicina	Sí	125mg	Cada 6h	Oral		14/06/2023	19/06/2023	No
21-4	1	Eliquis	No	5mg	Cada 12h	Oral		ND/ND/ND		Sí
21-4	2	Openvas	No	20mg	Cada 24h	Oral		ND/ND/ND		Sí
21-4	3	Bisoprolol	No	2.5mg	Cada 24h	Oral		ND/ND/ND		Sí
21-4	4	Cardyl	No	10	Cada 24h	Oral		ND/ND/ND		Sí
21-4	5	Eutirox	No	75mcg	4 días a la semana	Oral		ND/ND/ND		Sí
21-4	6	Eutirox	No	88mcg	3 días a la semana	Oral		ND/ND/ND		Sí
21-4	7	Paracetamol	No	1g	Cada 8h	Oral		26/08/2023	31/08/2023	No
21-4	8	Enantyum	No	25mg	Cada 8h	Oral		26/08/2023	31/08/2023	No
21-4	9	Augmentine	No	875/125mg	Cada 8h	Oral		26/08/2023	30/08/2023	No

## Sheet: Visita 2
Centro	Nº de Paciente	Fecha de la visita	¿Se ha registrado algún episodio de diarrea desde la visita anterior?:*	Fecha inicio del episodio	Fecha fin del episodio	Peso	Peso. ND	Talla	Talla. ND	IMC (masa/estatura²)	Tensión Arterial. Sistólica	ND	Tensión Arterial. Diastólica	ND	Temperatura	Temperatura. ND	Sistema Cardiovascular	En caso de anormal, describir	Abdomen	En caso de anormal, describir	Exploración neurológica sensitiva	En caso de anormal, describir	Exploración neurológica motora	En caso de anormal, describir	Musculoesquelética y Extremidades	En caso de anormal, describir	Otros	Especificar	En caso de anormal, describir	Número de deposiciones/24h	No recogido/No disponible	Fecha de las deposiciones	Número de días de duración del episodio de diarrea	No recogido/No disponible	Fecha de inicio del episodio	Fecha de fin del episodio	¿Ha estado hospitalizado el paciente?	En caso afirmativo. Fecha de ingreso	Fecha de alta	Recuento leucocitario	CS/NCS	Proteína C reactiva (PCR)	CS/NCS	Nivel de creatinina sérica	CS/NCS	¿Se ha producido shock séptico?	En caso afirmativo, Fecha	¿Ha habido íleo o megacolon?	En caso afirmativo, Fecha
01	01-1	05/11/2021	No			56	0		1		111	0	78	0	36.4	0	Anormal	Chronic stable ischemic heart disease	Normal		Normal		Normal		Normal		Normal	ninguno		1		05/11/2021					Sí	29/10/2021	19/11/2021	15.8	NCS	14.7	NCS	0.97	NCS	No		No
01	01-2	10/03/2022	No			69.2	0	170	0	23.94	132	0	60	0	36.4	0	Normal		Normal		Normal		Normal		Normal		No realizado			1		09/03/2022					No			8.81	NCS	11	NCS	0.83	NCS	No		No
01	01-3	11/07/2022	No			55	0	162	0	20.96	131	0	75	0	36.3	0	Normal		Normal		Normal		Normal		Normal		No realizado			3		10/07/2022		No recogido			No			6.65	NCS	1	NCS	0.76	NCS	No		No
01	01-4	18/10/2022	No			66.3	0	168	0	23.49	154	0	75	0	36.4	0	Normal		Normal		Normal		Normal		Normal		No realizado			3		17/10/2022		No recogido			No			6.34	NCS	1.8	NCS	0.73	NCS	No		No
01	01-5	27/02/2023	Sí	27/02/2023	28/02/2023	75.2	0	168	0	26.64	116	0	60	0	36.6	0	Normal		Normal		Normal		Normal		Anormal	prurito en antebrazos	No realizado			3		27/02/2023	2		27/02/2023	28/02/2023	No			8.27	NCS	1.6	NCS	0.65	NCS	No		No
01	01-6	03/03/2023	No			53.5	0	163	0	20.14	107	0	54	0	36.4	0	Normal		Normal		Normal		Normal		Normal		No realizado			2		02/03/2023					No			4.27	NCS	1.1	NCS	0.61	NCS	No		No
01	01-7	02/06/2023	No				1		1			1		1		1	Normal		Normal		Normal		Normal		Normal		No realizado				No disponible			No recogido			No			ND		ND		ND		No		No
01	01-8	07/09/2023	Sí	06/09/2023	06/09/2023	53	0	173	0	17.71		1		1		1	Normal		Normal		Normal		Normal		Normal		No realizado			6		06/09/2023	1		06/09/2023	06/09/2023	No			ND		ND		ND		No		No
03	03-1	09/05/2022	No			64	0	162	0	24.39	111	0	74	0		1	Normal		Normal		Normal		Normal		Normal		No realizado			1		ND/ND/ND					Sí	29/04/2022	10/05/2022	5.97	NCS	ND		1.45	NCS	No		No
03	03-2	18/07/2022	Sí	18/07/2022	18/07/2022	39	0		1	17.33	127	0	68	0		1	Normal		Anormal	abdominal pain	Normal		Normal		Normal		Anormal	Nausea	gastroesophageal reflux	3		18/07/2022	1		18/07/2022	18/07/2022	No			7.28	NCS	1	NCS	0.56	NCS	No		No
03	03-3	25/01/2023	No			48	0	156	0	19.72	105	0	52	0	36	0	Normal		Normal		Normal		Normal		Normal		No realizado			2		25/01/2023					Sí	14/12/2022	25/01/2023	4.61	NCS	13	NCS	0.63	NCS	No		No
03	03-4	24/03/2023	No			71.7	0	155	0	29.84	128	0	74	0	36.5	0	Normal		Normal		Normal		Normal		Normal		No realizado			2		ND/ND/ND					No			7.04	NCS	5	NCS	2.01	NCS	No		No
03	03-5	24/04/2023	No			90	0	174	0	29.73	144	0	82	0	36.7	0	Normal		Anormal	abdominal pain	Normal		Normal		Normal		No realizado				No recogido			No recogido			No			18.92	CS	162	CS	1.08	NCS	No		No
04	04-1	04/04/2022	No			84	0	171	0	28.73	117	0	76	0	36.8	0	Normal		Normal		No realizado		No realizado		No realizado		No realizado			2		03/04/2022					No			8.2	NCS	5.5	NCS	0.97	NCS	No		No
05	05-1	17/02/2023	No			48	0	165	0	17.63	100	0	75	0	35.8	0	Normal		Normal		Normal		Normal		Normal		No realizado			3		16/02/2023		No recogido			No			ND		ND		ND		No		No
05	05-2	27/04/2023	Sí	25/04/2023	26/04/2023	52	0	154	0	21.93	105	0	73	0	35.6	0	Anormal	Insuficiència mitral severa	Normal		Normal		Normal		Normal		No realizado			10		25/04/2023	2		25/04/2023	26/04/2023	No			7.01	NCS	4	NCS	0.82	NCS	No		No
05	05-3	09/10/2023	No			66	0	168	0	23.38	127	0	70	0	35.4	0	Normal		Normal		Normal		Normal		Normal		No realizado			2		08/10/2023					No			6.92	NCS	19.3	CS	1.78	CS	No		No
06	06-2	13/05/2022	Sí	12/05/2022	13/05/2022	130	0	149	0	58.56	130	0	80	0	35.7	0	Normal		Normal		Normal		Normal		Normal		No realizado			3		13/05/2022	1		12/05/2022	13/05/2022	No			ND		ND		ND		No		No
06	06-3	20/06/2022	No			70	0	168	0	24.8	155	0	88	0	35.7	0	Normal		Normal		Normal		Normal		Normal		No realizado			2		19/06/2022					Sí	14/06/2022	21/06/2022	5.78	NCS	22.59	CS	0.99	NCS	No		No
06	06-4	14/07/2023	No			61	0	169	0	21.36	125	0	71	0	36.3	0	Normal		Normal		Normal		Normal		Normal		Normal	Sin alteraciones		3		14/07/2023		No recogido			No			6.84	NCS	1	NCS	0.8	NCS	No		No
06	06-5	29/07/2023	No			70	0	169	0	24.51	136	0	96	0	36.5	0	Normal		Normal		Normal		Normal		Normal		No realizado			0		29/07/2023					Sí	23/07/2023	31/07/2023	5.15	NCS	46.2	NCS	1.95	NCS	No		No
07	07-1	01/04/2022	No			45	0	152	0	19.48	120	0	90	0	35.9	0	Anormal	soplo sistolico	Normal		No realizado		No realizado		Normal		No realizado			2		31/03/2022					Sí	12/03/2022	04/04/2022	5.82	NCS	42.7	NCS	0.67	NCS	No		No
07	07-2	30/06/2022	Sí	21/06/2022	30/06/2022	91	0	181	0	27.78	111	0	68	0	36.5	0	Normal		Normal		Normal		Normal		Normal		No realizado			10		29/06/2022	9		21/06/2022	30/06/2022	Sí	26/06/2022	30/06/2022	19.5	NCS	50.2	NCS	0.89	NCS	No		No
07	07-3	13/01/2023	No			56	0	156	0	23.01	106	0	57	0		1	Normal		Normal		Normal		Normal		Normal		No realizado			3		13/01/2023	0		ND/ND/ND	ND/ND/ND	No			ND		ND		ND		No		No
07	07-4	21/04/2023	No			65	0	162	0	24.77	103	0	65	0	36.3	0	Normal		Normal		Normal		Normal		Normal		No realizado			2		20/04/2023					Sí	29/03/2023	21/04/2023	ND		ND		ND		No		No
07	07-5	28/04/2023	No			69	0	159	0	27.29	127	0	64	0		1	Normal		Normal		Normal		Normal		Normal		No realizado			2		27/04/2023					No			ND		ND		ND		No		No
07	07-6	30/06/2023	No			68.3	0	157	0	27.71	110	0	69	0		1	Normal		Normal		Normal		Normal		Normal		No realizado			0		ND/ND/ND					No			7.97	NCS	0	NCS	ND		No		No
08	08-1	25/03/2022	No			71.1	0	167	0	25.49	123	0	74	0	36.4	0	Normal		Normal		Normal		Normal		Normal		Normal	NA		1		24/03/2022					No			5.3	NCS	0.4	NCS	0.7	NCS	No		No
08	08-2	22/12/2022	No			76.3	0	163	0	28.72	90	0	55	0	37.2	0	Normal		Normal		Normal		Normal		Normal		Normal	NA		4		21/12/2022	1		21/12/2022	21/12/2022	Sí	14/12/2022	22/12/2022	7.7	NCS	1	NCS	0.84	NCS	No		No
08	08-3	05/01/2023	No			57.6	0	161	0	22.22	130	0	64	0	36.3	0	Normal		Normal		Normal		Normal		Normal		Normal	NA		2		04/01/2023					No			8.1	NCS	0.4	NCS	0.7	NCS	No		No
08	08-4	12/01/2023	No			77.2	0	156	0	31.72	128	0	89	0	36.7	0	Normal		Normal		Normal		Normal		Normal		Normal	na		4		11/01/2023		No recogido			No			6.6	NCS	0.4	NCS	0.77	NCS	No		No
08	08-5	20/01/2023	No			58.8	0	157.1	0	23.82	105	0	69	0	35.5	0	Normal		Normal		Normal		Normal		Normal		Normal	na		0		19/01/2023					No			4.9	NCS	25	NCS	1.12	NCS	No		No
08	08-6	13/02/2023	No			51.4	0	163	0	19.35	113	0	68	0	36.7	0	Normal		Normal		Normal		Normal		Normal		Normal	NA		2		12/02/2023					No			9.7	NCS	15	NCS	0.67	NCS	No		No
08	08-7	06/03/2023	Sí	03/03/2023	ND/ND/ND	58	0	163	0	21.83	121	0	77	0	36.4	0	Normal		Anormal	dolor leve	Normal		Normal		Normal		Normal	na		10		05/03/2023		No recogido			No			5.9	NCS	90	NCS	0.77	NCS	No		No
08	08-8	08/05/2023	No			57.4	0	156.5	0	23.44	112	0	76	0	36.7	0	Normal		Normal		Normal		Normal		Normal		Normal	na		1		07/05/2023					No			5.5	NCS	4	NCS	0.68	NCS	No		No
08	08-9	16/05/2023	No			114.1	0	169	0	39.95	128	0	95	0	35.9	0	Normal		Normal		Normal		Normal		Normal		Normal	na		2		16/05/2023					No			12.3	NCS	10	NCS	0.99	NCS	No		No
08	08-10	26/05/2023	No			80.7	0	177.5	0	25.61	128	0	85	0	36.1	0	Normal		Normal		Normal		Normal		Normal		Normal	na		1		25/05/2023					No			4	NCS	4	NCS	1.04	NCS	No		No
08	08-11	05/06/2023	Sí	17/05/2023	08/06/2023	97.2	0	160	0	37.97	117	0	72	0	36.6	0	Normal		Normal		Normal		Normal		Normal		Normal	na		5		17/05/2023	22		17/05/2023	08/06/2023	No			11	NCS	27	NCS	0.78	NCS	No		No
08	08-12	04/07/2023	Sí	29/06/2023	04/07/2023	80.1	0	172	0	27.08	90	0	55	0	36.7	0	Normal		Normal		Normal		Normal		Normal		Normal	na		5		03/07/2023	3		02/07/2023	04/07/2023	Sí	27/06/2023	04/07/2023	5.6	NCS	4	NCS	0.74	NCS	No		No
08	08-13	10/07/2023	Sí	05/07/2023	ND/ND/ND	60.5	0	150	0	26.89	106	0	66	0	36.8	0	Normal		Normal		Normal		Normal		Normal		Normal	na		9		09/07/2023		No recogido			No			4.6	NCS	18	CS	0.54	NCS	No		No
08	08-14	10/07/2023	No			44.3	0	153	0	18.92	113	0	76	0	36.6	0	Normal		Normal		Normal		Normal		Normal		Normal	na		1		09/07/2023					No			6.9	NCS	40	NCS	0.63	NCS	No		No
08	08-15	27/07/2023	Sí	26/07/2023	26/07/2023	48.9	0	156	0	20.09	96	0	64	0	36.3	0	Normal		Normal		Normal		Normal		Normal		Normal	na		3		26/07/2023		No recogido			No			6	NCS	4	NCS	0.7	NCS	No		No
09	09-4	24/06/2022	No			59	0	160	0	23.05	150	0	90	0	36.2	0	Normal		Normal		Normal		Normal		Normal		Normal	-		1		24/06/2022					Sí	19/06/2022	04/07/2022	21.1	NCS	13.33	NCS	1.21	NCS	No		No
09	09-5	19/12/2022	No			68	0	178	0	21.46	129	0	86	0	36	0	Normal		Normal		Normal		Normal		Normal		No realizado			0		ND/ND/ND					Sí	08/12/2022	22/12/2022	19	NCS	180.42	CS	0.77	NCS	No		No
09	09-6	22/12/2022	No			70	0	174	0	23.12		1		1		1	No realizado		No realizado		No realizado		No realizado		No realizado		No realizado			1		22/12/2022					Sí	19/12/2022	22/12/2022	ND		ND		ND		No		No
09	09-7	02/01/2023	Sí	31/12/2022	01/01/2023	75	0	170	0	25.95	130	0	60	0	36.4	0	Normal		Normal		Normal		Normal		Normal		No realizado			4		31/12/2022	1		31/12/2022	01/01/2023	Sí	23/12/2022	02/01/2023	5.7	NCS	20.74	NCS	0.43	NCS	No		No
09	09-8	12/01/2023	No			58	0	155	0	24.14		1		1		1	Normal		Normal		Normal		Normal		Normal		No realizado			1		12/01/2023					No			5.5	NCS	5.66	NCS	0.99	NCS	No		No
09	09-9	12/01/2023	No			56	0	148	0	25.57	140	0	65	0	36.7	0	Normal		Normal		Normal		Normal		Normal		No realizado			0		ND/ND/ND					Sí	09/01/2023	12/01/2023	3.1	NCS	27.04	NCS	0.73	NCS	No		No
09	09-10	26/01/2023	Sí	26/01/2023	26/01/2023		1	164	0	25.65	120	0	60	0	35.7	0	Normal		Normal		Normal		Normal		Normal		No realizado			4		26/01/2023		No recogido			Sí	23/01/2023	26/01/2023	4.8	NCS	17.49	NCS	1.93	NCS	No		No
09	09-11	10/02/2023	No			44.5	0	152	0	19.26	110	0	54	0	35.5	0	Normal		Normal		Normal		Normal		Normal		No realizado			2		09/01/2023					No			6.8	NCS	41.99	NCS	0.77	NCS	No		No
09	09-12	16/02/2023	No			85	0	165	0	31.22	110	0	60	0	63.2	0	Normal		Normal		Normal		Normal		Normal		Anormal	hemorroides inflamadas	hemorroides inflamadas	2		ND/ND/ND					Sí	02/02/2023	14/02/2023	3.2	NCS	38.03	NCS	1.58	NCS	No		No
09	09-13	06/03/2023	Sí	06/03/2023	06/03/2023	81	0	171	0	27.7	130	0	75	0	36.2	0	Normal		Normal		Normal		Normal		Normal		No realizado			4		06/03/2023	14		14/02/2023	ND/ND/ND	No			9	NCS	78.39	NCS	0.89	NCS	No		No
09	09-14	16/03/2023	No			50	0	163	0	18.82	125	0	65	0	35.7	0	Normal		Normal		Normal		Normal		Normal		No realizado			2		16/03/2023					Sí	13/03/2023	16/03/2023	3.9	NCS	2.47	NCS	0.68	NCS	No		No
09	09-15	20/03/2023	No			69.5	0	160	0	27.15	155	0	75	0	36.3	0	Normal		Normal		Normal		Normal		Normal		No realizado			2		19/03/2023					No			9.3	NCS	10.32	NCS	1.54	NCS	No		No
09	09-16	20/03/2023	No			143	0	178	0	45.13	125	0	90	0	36.5	0	Normal		Anormal	globuloso	Normal		Normal		Normal		Normal	rha escaso, molestias difusas inespecíficas		2		20/03/2023					No			10.8	NCS	7.3	NCS	0.93	NCS	No		No
09	09-17	06/05/2023	No			77.1	0	172	0	26.06	124	0	70	0	36	0	Normal		Normal		Normal		Normal		No realizado		No realizado			1		06/05/2023					Sí	03/05/2023	06/05/2023	7.7	NCS	11.1	NCS	1.14	NCS	No		No
09	09-18	12/05/2023	No				1		1			1		1		1	Normal		Normal		Normal		Normal		Normal		No realizado			2		12/05/2023					No			11.3	NCS	6.9	NCS	1.01	NCS	No		No
09	09-19	22/06/2023	No			42.9	0	153	0	18.33	115	0	65	0	36.2	0	Normal		Normal		Normal		Normal		Normal		No realizado			2		ND/ND/ND					No			6	NCS	5.44	NCS	0.64	NCS	No		No
09	09-20	23/06/2023	Sí	16/06/2023	23/06/2023	64.2	0	165	0	23.58	144	0	72	0	35.5	0	Normal		Normal		Normal		Normal		Normal		No realizado			5		23/06/2023	7		16/06/2023	23/06/2023	No			4.3	NCS	52.2	NCS	9.34	NCS	No		No
09	09-21	06/07/2023	No			65.5	0	170	0	22.66	155	0	85	0	36.3	0	Normal		Normal		Normal		Normal		Normal		No realizado			1		ND/ND/ND					No			ND		ND		ND		No		No
09	09-22	17/07/2023	No			60.1	0	146	0	28.19	100	0	70	0	35.5	0	Normal		Normal		Normal		Normal		Normal		No realizado			1		14/07/2023					Sí	11/07/2023	17/07/2023	7.3	NCS	22.2	NCS	0.62	NCS	No		No
09	09-23	11/09/2023	Sí	10/09/2023	11/09/2023	55.1	0	149	0	24.82	180	0	80	0	36.5	0	Normal		Normal		Normal		Normal		Normal		No realizado			4		10/09/2023		No disponible			Sí	03/09/2023	11/09/2023	4.6	NCS	24.5	NCS	0.57	NCS	No		No
09	09-24	21/09/2023	No			54	0	163	0	20.32	130	0	76	0	36.2	0	Normal		Normal		Normal		Normal		Normal		No realizado			2		21/09/2023					No			ND		0.84	NCS	0.71	NCS	No		No
11	11-1
11	11-2	30/12/2022	No			67	0	158	0	26.84	103	0	63	0	36	0	Normal		Normal		Normal		Normal		Normal		Normal	AP: MVC		1		29/12/2022					No			7.1	NCS	1.2	NCS	0.55	NCS	No		No
11	11-3	13/01/2023	Sí	10/01/2023	10/01/2023	69.8	0	163	0	26.27	136	0	87	0	36.1	0	Normal		Normal		No realizado		Normal		Normal		Normal	AC: ritmico. AP: MVC		6		10/01/2023	1		10/01/2023	10/01/2023	No			4.4	NCS	1.6	NCS	0.86	NCS	No		No
11	11-4	20/01/2023	Sí	17/01/2023	20/01/2023	69.9	0	165.5	0	25.52	125	0	78	0	35.2	0	Normal		Normal		Normal		Normal		Normal		Normal	ACP: normal		5		ND/ND/ND	4		17/01/2023	20/01/2023	No			5.5	NCS	3.8	NCS	0.67	NCS	No		No
11	11-5	30/01/2023	Sí	26/01/2023	30/01/2023	70.6	0	156	0	29.01	101	0	69	0	36.1	0	Normal		Normal		Normal		Normal		Normal		Normal	ACP normal		5		ND/ND/ND	5		26/01/2023	30/01/2023	No			7.2	NCS	82	CS	1.03	NCS	No		No
11	11-6	21/03/2023	No			71	0	178	0	22.41	137	0	85	0	36.3	0	Normal		Normal		Normal		Normal		Normal		Normal	ACP normal		1		ND/ND/ND					No			6.4	NCS	1.1	NCS	0.72	NCS	No		No
11	11-7	15/05/2023	No			63.3	0	154	0	26.69	110	0	70	0	35.6	0	Normal		Normal		Normal		Normal		Normal		Normal	ACP normal		1		ND/ND/ND					No			ND		ND		ND		No		No
11	11-8	02/06/2023	Sí	30/05/2023	02/06/2023	86.2	0	168	0	30.54	131	0	85	0	36.1	0	Normal		Normal		Normal		Normal		Normal		No realizado			4		ND/ND/ND	4		30/05/2023	02/06/2023	No			5.1	NCS	1.5	NCS	1.25	NCS	No		No
11	11-9	19/07/2023	No			60.9	0		1		104	0	56	0	35.3	0	Normal		Normal		Normal		Normal		Normal		No realizado			2		ND/ND/ND					No			7.1	NCS	3.3	NCS	0.92	NCS	No		No
11	11-10	31/07/2023	No			82	0	170	0	28.37	138	0	84	0	35.1	0	Normal		Normal		Normal		Normal		Normal		No realizado			2		30/07/2023					No			5.7	NCS	0.5	NCS	0.86	NCS	No		No
11	11-11	11/08/2023	No			52.5	0	161	0	20.25	101	0	65	0	35.5	0	Normal		Normal		Normal		Normal		Normal		No realizado			2		10/08/2023					No			5.1	NCS	3	NCS	0.65	NCS	No		No
11	11-12	31/08/2023	No			52.5	0	162	0	20	111	0	70	0	35.4	0	Normal		Normal		Normal		Normal		Normal		No realizado			1		ND/ND/ND					No			5.4	NCS	2.3	NCS	0.57	NCS	No		No
12	12-1	29/04/2022	No			48	0	154.2	0	20.19	158	0	82	0	35.6	0	Normal		Normal		Normal		Normal		Normal		Normal	nr		2		28/04/2022					No			11.77	NCS	17	NCS	0.52	NCS	No		No
13	13-1	04/09/2023	No			45	0	150	0	20	105	0	65	0	35.5	0	Normal		Normal		Normal		Normal		Normal		No realizado			2		ND/ND/ND					No			7.5	NCS	4.9	NCS	0.5	NCS	No		No
16	16-1	23/06/2022	Sí	21/06/2022	23/06/2022	56.7	0	155	0	23.6	143	0	75	0	36	0	Normal		Normal		No realizado		No realizado		No realizado		No realizado			5		22/06/2022	2		21/06/2022	23/06/2022	No			7.5	NCS	ND		0.61	NCS	No		No
17	17-1	28/03/2022	No			62	0	172	0	20.96	125	0	70	0		1	Normal		Normal		Normal		Normal		Normal		Normal	NA		2		ND/ND/ND					No			ND		ND		ND		No		No
17	17-2	11/04/2022	No			100	0	152	0	43.28	140	0	80	0		1	No realizado		Anormal	dolor	Normal		Normal		Normal		Normal	NA		3		10/04/2022		No recogido			No			ND		ND		ND		No		No
17	17-3
17	17-4	19/12/2022	Sí				1		1			1		1		1	No realizado		No realizado		No realizado		No realizado		No realizado		No realizado			3		ND/ND/ND		No disponible			No			ND		ND		ND		No		No
17	17-5	13/03/2023	No			86	0	170	0	29.76	146	0	81	0		1	Normal		Normal		Normal		Normal		Normal		No realizado			1		12/03/2023					No			8.5	NCS	1.4	NCS	0.6	NCS	No		No
17	17-6	30/03/2023	No			63	0	155	0	26.22	112	0	54	0	35.4	0	Normal		Normal		Normal		Normal		Normal		No realizado			0		29/03/2023					No			10.45	NCS	24.8	NCS	1.16	NCS	No		No
18	18-1	14/10/2022	Sí	12/10/2022	18/10/2022	77	0	150	0	34.22	103	0	66	0	35.9	0	Normal		Normal		Normal		Normal		Normal		No realizado			4		13/10/2022	2		12/10/2022	14/10/2022	Sí	10/10/2022	18/10/2022	12.18	NCS	78.6	NCS	0.97	NCS	No		No
18	18-2	30/01/2023	Sí	27/01/2023	27/01/2023		1		1		123	0	68	0	36	0	Normal		Normal		Normal		Normal		Normal		No realizado			5		27/01/2023	1		27/01/2023	27/01/2023	Sí	23/01/2023	31/01/2023	3.95	NCS	36.2	NCS	0.66	NCS	No		No
18	18-3	03/02/2023	No			58.6	0	152	0	25.36	118	0	49	0	37	0	Normal		Normal		Normal		Normal		Normal		No realizado			0		02/02/2023					No			5.49	NCS	13.6	NCS	ND		No		No
20	20-1	15/08/2022	Sí	08/08/2022	22/08/2022	63.5	0	164	0	23.61	95	0	50	0	36.8	0	Normal		Normal		Normal		Normal		Normal		No realizado			6		12/08/2022	1		12/08/2022	13/08/2022	Sí	06/08/2022	23/08/2022	9.62	NCS	133.6	NCS	0.3	NCS	No		No
20	20-2	17/12/2022	No			67.7	0	165	0	24.87	110	0	70	0	36.2	0	Normal		Normal		Normal		Normal		Normal		No realizado			0		ND/ND/ND					Sí	28/11/2022	17/01/2023	ND		ND		ND		No		No
21	21-1	19/12/2022	No			83	0	180	0	25.62	131	0	73	0		1	Normal		Normal		Normal		Normal		Normal		No realizado			1		18/12/2022					Sí	09/12/2022	16/12/2022	3.8	NCS	1.3	NCS	1.04	NCS	No		No
21	21-2	07/01/2023	No			125.2	0	183	0	37.39	134	0	86	0	36.2	0	Normal		Normal		Normal		Normal		Normal		No realizado			1		06/01/2023					No			7.9	NCS	0.4	NCS	1.69	NCS	No		No
21	21-3	26/06/2023	No			71	0	167	0	25.46	158	0	85	0	36.4	0	No realizado		No realizado		No realizado		No realizado		No realizado		No realizado			2		26/06/2023					No			5	NCS	0.2	NCS	1.01	NCS	No		No
21	21-4	12/09/2023	No			65.1	0	158	0	26.08	120	0	60	0	36.5	0	Normal		Normal		Normal		Normal		Normal		No realizado			3		11/09/2023	0		ND/ND/ND	ND/ND/ND	No			10.1	NCS	ND		20	NCS	No		No
[truncated: 17 more columns]

## Sheet: Visita 3
Centro	Nº de Paciente	Fecha de la visita	¿Se ha registrado algún episodio de diarrea desde la visita anterior?:*	Fecha inicio del episodio	Fecha fin del episodio	Fecha inicio del episodio	Fecha fin del episodio	Peso	Peso. ND	Talla	Talla. ND	IMC (masa/estatura²)	Tensión Arterial. Sistólica	ND	Tensión Arterial. Diastólica	ND	Temperatura	Temperatura. ND	Sistema Cardiovascular	En caso de anormal, describir	Abdomen	En caso de anormal, describir	Exploración neurológica sensitiva	En caso de anormal, describir	Exploración neurológica motora	En caso de anormal, describir	Musculoesquelética y Extremidades	En caso de anormal, describir	Otros	Especificar	En caso de anormal, describir	Número de deposiciones/24h	No recogido/No disponible	Fecha de las deposiciones	Número de días de duración del episodio de diarrea	No recogido/No disponible	Fecha de inicio del episodio	Fecha de fin del episodio	Continúa	¿Ha estado hospitalizado el paciente?	En caso afirmativo. Fecha de ingreso	Fecha de alta	Recuento leucocitario	CS/NCS	Proteína C reactiva (PCR)	CS/NCS	Nivel de creatinina sérica	CS/NCS	¿Se ha producido shock séptico?
01	01-1
01	01-2	28/03/2022	No					69.2	0	170	0	23.94	151	0	65	0	36.3	0	Normal		Normal		Normal		Normal		Normal		No realizado			1		27/03/2022						No			6.15	NCS	1	NCS	0.92	NCS	No
01	01-3	27/07/2022	No						1		1			1		1		1	No realizado		No realizado		No realizado		No realizado		No realizado		No realizado			3		26/07/2022		No recogido				No			ND		ND		ND		No
01	01-4	02/11/2022	Sí	31/10/2022	13/11/2022			66.3	0	168	0	23.49	145	0	90	0	36.4	0	Normal		Anormal	dolor hipogastrico	Normal		Normal		Normal		No realizado			8		31/10/2022	13		31/10/2022	13/11/2022		No			ND		ND		ND		No
01	01-5	15/03/2023	No					75.1	0	168	0	26.61	126	0	73	0	36.4	0	Normal		Normal		Normal		Normal		Anormal	Placas eritematosas en pliegue de codos, pliegue mamario, antebrazos y cara interna de muslos bilateral	No realizado			2		14/03/2023						No			8.59	NCS	0.7	NCS	0.71	NCS	No
01	01-6	17/03/2023	No						1		1			1		1		1	No realizado		No realizado		No realizado		No realizado		No realizado		No realizado			2		16/03/2023						No			ND		ND		ND		No
01	01-7	20/06/2023	No					64.7	0	158	0	25.92	108	0	63	0	36.1	0	Normal		Normal		Normal		Normal		Normal		No realizado			1		ND/ND/ND						No			ND		ND		ND		No
01	01-8	26/09/2023	No					57.7	0	173	0	19.28	131	0	91	0	36.3	0	Normal		Normal		Normal		Normal		Normal		No realizado			3		ND/ND/ND		No recogido				No			ND		ND		ND		No
03	03-1	30/05/2022	Sí	11/05/2022	29/05/2022			62.3	0	162	0	23.74	95	0	66	0		1	Normal		Normal		Normal		Normal		Normal		No realizado			8		11/05/2022	18		11/05/2022	29/05/2022		No			5.21	NCS	44.7	CS	14.41	CS	No
03	03-2	09/08/2022	No					40.75	0	148	0	18.6	147	0	78	0		1	Normal		Normal		Normal		Normal		Normal		Anormal	No realizado	nausea	1		ND/ND/ND						No			5.35	NCS	1	NCS	0.59	NCS	No
03	03-3	16/02/2023	No					43.4	0	156	0	17.83	115	0	57	0	35.4	0	Normal		Normal		Normal		Normal		Normal		No realizado			3		15/02/2023		No recogido				No			4.22	NCS	1	NCS	0.49	NCS	No
03	03-4	12/04/2023	No					73.9	0	155	0	30.76	144	0	81	0	36.4	0	Normal		Normal		Normal		Normal		Normal		No realizado			2		ND/ND/ND						No			5.56	NCS	ND		1.36	NCS	No
03	03-5
04	04-1	21/04/2022	Sí	11/04/2022	26/05/2022			84	0	171	0	28.73	136	0	90	0	36.7	0	No realizado		Normal		No realizado		No realizado		No realizado		No realizado			4		11/04/2022	46		11/04/2022	26/05/2022		No			ND		ND		ND		No
05	05-1	08/03/2023	No						1	165	0			1		1		1	Normal		Normal		Normal		Normal		Normal		No realizado			1		08/03/2023						No			ND		ND		ND		No
05	05-2	15/05/2023	No					54	0	154	0	22.77	115	0	54	0	35.4	0	Anormal	insuficiencia mitral	Normal		Normal		Normal		Normal		No realizado			3		14/05/2023	0		ND/ND/ND	26/04/2023		No			7.83	NCS	4	NCS	0.74	NCS	No
05	05-3	30/10/2023	No					67	0	167	0	24.02	112	0	71	0	35.4	0	Normal		Normal		Normal		Normal		Normal		No realizado			0.25		30/10/2023						No			8.27	NCS	33.7	NCS	1.61	NCS	No
06	06-2	02/06/2022	No					100	0	149	0	45.04		1		1		1	Normal		Normal		Normal		Normal		Normal		No realizado			1		31/05/2022						No			ND		ND		ND		No
06	06-3	06/07/2022	No					70	0	168	0	24.8	181	0	92	0	35.4	0	Normal		Normal		Normal		Normal		Normal		No realizado			0		ND/ND/ND						No			ND		ND		ND		No
06	06-4	27/07/2023	No					60	0	169	0	21.01	120	0	78	0	36.1	0	Normal		Normal		Normal		Normal		Normal		No realizado			2		27/07/2023						No			ND		ND		ND		No
06	06-5	18/08/2023	No					70	0	169	0	24.51	124	0	76	0	36.7	0	Normal		Normal		Normal		Normal		Normal		No realizado			0		17/08/2023						No			4.66	NCS	20.62	NCS	1.84	NCS	No
07	07-1	22/04/2022	Sí	20/04/2022	22/04/2022			43	0	152	0	18.61	105	0	52	0		1	No realizado		Normal		No realizado		No realizado		Normal		Normal	buen estado general, normocoloreado, normohidratado		3		20/04/2022	2		20/04/2022	22/04/2022		No			ND		ND		ND		No
07	07-2
07	07-3	30/01/2023	No					56	0	156	0	23.01		1		1		1	No realizado		Normal		Normal		Normal		Normal		Normal	No lesiones cutáneas		4		30/01/2023	0		ND/ND/ND	ND/ND/ND		No			ND		ND		ND		No
07	07-4	08/05/2023	No					67	0	162	0	25.53	120	0	73	0	35.8	0	Normal		Normal		Normal		Normal		Normal		No realizado				No recogido			No recogido				No			ND		ND		ND		No
07	07-5
07	07-6	15/07/2023	No					70.4	0	157	0	28.56	110	0	66	0		1	Normal		Normal		Normal		Normal		Normal		No realizado			0.5		ND/ND/ND						No			ND		ND		ND		No
08	08-1	08/04/2022	No					69.9	0	167	0	25.06	116	0	75	0	35.8	0	Normal		Normal		Normal		Normal		Normal		Normal	NA		1		07/04/2022						No			ND		ND		ND		No
08	08-2
08	08-3	23/01/2023	No					58.3	0	161	0	22.49	126	0	72	0	36.7	0	Normal		Normal		Normal		Normal		Normal		Normal	na		2		22/01/2023						No			6.5	NCS	0.4	NCS	0.68	NCS	No
08	08-4	30/01/2023	No					78.4	0	156	0	32.22	124	0	85	0	36.4	0	Normal		Normal		Normal		Normal		Normal		Normal	na		3		29/01/2023		No recogido				No			5.1	NCS	0.4	NCS	0.83	NCS	No
08	08-5	07/02/2023	No					60.5	0	157.1	0	24.51	125	0	73	0	36.4	0	Normal		Normal		Normal		Normal		Normal		Normal	na		1		06/02/2023						No			7.6	NCS	430	NCS	1.25	NCS	No
08	08-6	03/03/2023	No					50.2	0	163	0	18.89	112	0	78	0	36.6	0	Normal		Normal		Normal		Normal		Normal		Normal	na		1		02/03/2023						No			5	NCS	0.4	NCS	0.82	NCS	No
08	08-7
08	08-8	25/05/2023	No					57.3	0	156.5	0	23.4	106	0	69	0	36.2	0	Normal		Normal		Normal		Normal		Normal		Normal	na		1		24/05/2023						No			5.4	NCS	4	NCS	0.71	NCS	No
08	08-9	16/06/2023	No					109.4	0	169	0	38.3	148	0	97	0	36.3	0	Normal		Normal		Normal		Normal		Normal		Normal	na		2		15/06/2023						No			10.8	NCS	10	NCS	0.99	NCS	No
08	08-10	14/06/2023	No					80.3	0	177.5	0	25.49	118	0	72	0	35.9	0	Normal		Normal		Normal		Normal		Normal		Normal	na		1		13/06/2023						No			3.3	NCS	4	NCS	0.92	NCS	No
08	08-11
08	08-12	20/07/2023	No					68.8	0	172	0	23.26	102	0	80	0	36.1	0	Normal		Normal		Normal		Normal		Normal		Normal	na		1		19/07/2023						No			6.2	NCS	4	NCS	0.8	NCS	No
08	08-13
08	08-14	27/07/2023	Sí	26/07/2023	26/07/2023			45.6	0	153	0	19.48	120	0	78	0	37	0	Normal		Normal		Normal		Normal		Normal		Normal	na		3		26/07/2023	1					No			6	NCS	7	NCS	0.52	NCS	No
08	08-15	17/08/2023	Sí	13/08/2023	15/08/2023			50.3	0	156	0	20.67	94	0	57	0	36.2	0	Normal		Normal		Normal		Normal		Normal		Normal	na		4		15/08/2023	2		13/08/2023	15/08/2023		No			6.2	NCS	4	NCS	0.64	NCS	No
09	09-4								0		0	1.95		0		0		0
09	09-5	09/01/2023	No						1		1			1		1		1	No realizado		No realizado		No realizado		No realizado		No realizado		No realizado			1		ND/ND/ND						No			ND		ND		ND		No
09	09-6	12/01/2023	No						1	174	0	27.69	145	0	75	0	36.3	0	Normal		Normal		Normal		Normal		Normal		No realizado			1		12/01/2023						No			ND		ND		ND		No
09	09-7	19/01/2023	No					73	0	170	0	25.26	140	0	86	0	35.4	0	Normal		Normal		Normal		Normal		Normal		No realizado			1		ND/ND/ND						No			4.3	NCS	4.27	NCS	0.63	NCS	No
09	09-8	26/01/2023	No					59	0	154	0	24.88	125	0	89	0	36.6	0	Normal		Normal		Normal		Normal		Normal		No realizado			1		ND/ND/ND						No			4.4	NCS	13.26	NCS	1.23	NCS	No
09	09-9	01/02/2023	No					56	0	148	0	25.57	115	0	55	0	35.8	0	Normal		Normal		Normal		Normal		Normal		Anormal	sensación de nerviosismo, algun episodio de ansiedad con palpitaciones nocturnas en relación con diversos acontecimientos vitales en los últimos años	sensación de nerviosismo, algun episodio de ansiedad con palpitaciones nocturnas en relacion con diversos acontecimientos vitales en los últimos años	1		ND/ND/ND						No			3.6	NCS	0.25	NCS	0.78	NCS	No
09	09-10	16/02/2023	No					70	0	164	0	26.03	125	0	65	0	36.4	0	Normal		Normal		Normal		Normal		Normal		No realizado			1		ND/ND/ND						No			5.5	NCS	11.18	NCS	1.57	NCS	No
09	09-11	03/03/2023	Sí	27/02/2023	27/02/2023				1		1			1		1		1	No realizado		No realizado		No realizado		No realizado		No realizado		No realizado			6		27/02/2023		No disponible				No			ND		ND		ND		No
09	09-12	09/03/2023	No					80	0	165	0	29.38	113	0	66	0	36.8	0	Normal		Normal		Normal		Normal		Normal		Normal	salvo HQ de absceso perianal/ prolapso hemorroidal con buen aspecto, en granulación, sin esfacelos ni exudado		1		09/03/2023						Sí	22/02/2023	10/03/2023	3.7	NCS	ND		1.72	NCS	No
09	09-13	22/03/2023	No					82	0	171	0	28.04	125	0	79	0	36.5	0	Normal		Normal		Normal		Normal		Normal		Normal	tumeración en pierna, que impreiona de paniculitis		2		22/03/2023						No			19	NCS	79.1	NCS	0.91	NCS	No
09	09-14	31/03/2023	No					50.8	0	163	0	19.12	145	0	65	0	36.8	0	Normal		Normal		Normal		Normal		Normal		No realizado			1		31/03/2023						No			ND		ND		ND		No
09	09-15	13/04/2023	No					71.9	0	157	0	29.17	141	0	71	0	36.2	0	Normal		Normal		Normal		Normal		Normal		No realizado			1		ND/ND/ND						No			ND		ND		ND		No
09	09-16	11/04/2023	No					138.5	0	178	0	43.71	120	0	80	0	36.4	0	Normal		Normal		Normal		Normal		Normal		No realizado			1		ND/ND/ND						No			ND		ND		ND		No
09	09-17	25/05/2023	No					79.3	0	171	0	27.12	145	0	60	0	36.5	0	Normal		Normal		Normal		Normal		Normal		No realizado			1		ND/ND/ND						No			ND		ND		ND		No
09	09-18
09	09-19	13/07/2023	No					44.3	0	153	0	18.92	110	0	60	0	35.8	0	Normal		Normal		Normal		Normal		Normal		No realizado			1		13/07/2023						No			ND		ND		ND		No
09	09-20	12/07/2023	No					61	0	165	0	22.41	134	0	64	0	36.5	0	Normal		Normal		Normal		Normal		Normal		No realizado			1		12/07/2023						No			3.5	NCS	ND		9.66	NCS	No
09	09-21	27/07/2023	No					64.8	0	165	0	23.8	149	0	97	0	36	0	Normal		Normal		Normal		Normal		Normal		No realizado			1		27/07/2023						No			ND		ND		ND		No
09	09-22	03/08/2023	No					60.5	0	146	0	28.38	110	0	70	0	35.8	0	Normal		Normal		Normal		Normal		Normal		No realizado			1		ND/ND/ND						No			ND		ND		ND		No
09	09-23	28/09/2023	No					57	0	149	0	25.67	130	0	50	0		1	Normal		Normal		Normal		Normal		Normal		No realizado			2		28/09/2023						No			ND		ND		ND		No
09	09-24	09/10/2023	No					55	0	163	0	20.7	115	0	75	0	36.2	0	Normal		Normal		Normal		Normal		Normal		Anormal	abd blando, no doloroso, RHa normales	abd blando, no doloroso, RHa normales	1		09/10/2023						No			ND		ND		ND		No
11	11-1
11	11-2	19/01/2023	No					67	0	158	0	26.84	115	0	79	0		1	Normal		Normal		Normal		Normal		Normal		Normal	AP: MVC // AC ritmica		1		ND/ND/ND						No			ND		ND		ND		No
11	11-3	31/01/2023	No					70	0	163	0	26.35	121	0	73	0		1	Normal		Normal		No realizado		No realizado		No realizado		Normal	AP: MVC // AC: ritmica		1		ND/ND/ND						No			ND		ND		ND		No
11	11-4	07/02/2023	No					69	0	165.5	0	25.19	138	0	80	0		1	Normal		Normal		Normal		Normal		Normal		Normal	ACP normal		2		ND/ND/ND						No			ND		ND		ND		No
11	11-5	16/02/2023	No					69.6	0	156	0	28.6	115	0	63	0	34.8	0	Normal		Normal		Normal		Normal		Normal		Normal	ACP normal		1		ND/ND/ND						No			ND		ND		ND		No
11	11-6	04/04/2023	No					69	0	178	0	21.78	125	0	79	0	35.4	0	Normal		Normal		Normal		Normal		Normal		Normal	ACP: normal		1		ND/ND/ND						No			ND		ND		ND		No
11	11-7	30/05/2023	No					63.2	0	154	0	26.65	113	0	72	0	34.1	0	Normal		Normal		Normal		Normal		Normal		Normal	ACP normal		1		ND/ND/ND						No			ND		ND		ND		No
11	11-8	20/06/2023	No					74.3	0	170	0	25.71	128	0	78	0	36.3	0	Normal		Normal		Normal		Normal		Normal		No realizado			2		ND/ND/ND						No			ND		ND		ND		No
11	11-9	07/08/2023	No					60.9	0	151	0	26.71	128	0	61	0	35.4	0	Normal		Normal		Normal		Normal		Normal		No realizado			2		ND/ND/ND						No			ND		ND		ND		No
11	11-10	18/08/2023	No					82	0	170	0	28.37	138	0	84	0	35.1	0	Normal		Normal		Normal		Normal		Normal		No realizado			2		ND/ND/ND						No			ND		ND		ND		No
11	11-11	29/08/2023	No					52.7	0	161	0	20.33	102	0	57	0	34.4	0	Normal		Normal		Normal		Normal		Normal		No realizado			2		ND/ND/ND						No			ND		ND		ND		No
11	11-12	19/09/2023	No					52.2	0	162	0	19.89	144	0	88	0	35.5	0	Normal		Normal		Normal		Normal		Normal		No realizado			1		ND/ND/ND						No			ND		ND		ND		No
12	12-1	18/05/2022	No					48.5	0	154	0	20.45	143	0	88	0	35.1	0	Normal		Normal		Normal		Normal		Normal		Normal	NR		1		17/05/2022						No			10.64	NCS	ND		ND		No
13	13-1	22/09/2023	No					45	0	150	0	20	100	0	60	0	36	0	Normal		Normal		Normal		Normal		Normal		No realizado			2		ND/ND/ND						No			6.6	NCS	2.6	NCS	0.46	NCS	No
16	16-1	11/07/2022	No					57.7	0	155	0	24.02	138	0	78	0	36	0	Normal		Normal		No realizado		No realizado		No realizado		No realizado			1		11/07/2022						No			ND		ND		ND		No
17	17-1
17	17-2	27/04/2022	No					100	0	152	0	43.28	125	0	73	0	36.8	0	Normal		Normal		Normal		Normal		Normal		Normal	NA		2		26/04/2022						No			ND		ND		ND		No
17	17-3
17	17-4
17	17-5	31/03/2023	Sí	20/03/2023	11/05/2023				1		1			1		1		1	No realizado		No realizado		No realizado		No realizado		No realizado		No realizado			4		20/03/2023	52		20/03/2023		Si	No			ND		ND		ND		No
17	17-6	17/04/2023	No						1		1			1		1		1	No realizado		No realizado		No realizado		No realizado		No realizado		No realizado				No recogido			No recogido				No			ND		ND		ND		No
18	18-1
18	18-2
18	18-3
20	20-1
20	20-2	04/01/2023	No					67	0	165	0	24.61	121	0	48	0	36.3	0	Normal		Normal		Normal		Normal		Normal		No realizado			1		ND/ND/ND						Sí	30/11/2022	17/01/2023	ND		ND		ND		No
21	21-1	04/01/2023	Sí	03/01/2023	03/01/2023			75.2	0	180	0	23.21	142	0	70	0	35.3	0	Normal		Normal		Normal		Normal		Normal		No realizado			5		03/01/2023	1		03/01/2023	03/01/2023		No			ND		ND		ND		No
21	21-2	23/01/2023	No					125.7	0	183	0	37.53	145	0	82	0	37.5	0	Normal		Normal		Normal		Normal		Normal		No realizado			1		ND/01/2023						No			ND		ND		ND		No
21	21-3	12/07/2023	No					71	0	167	0	25.46	150	0	96	0	35.5	0	Normal		Normal		Normal		Normal		Normal		No realizado			3		ND/ND/ND	0		ND/ND/ND	ND/ND/ND		No			ND		ND		ND		No
21	21-4	29/09/2023	No					60.2	0	158	0	24.11	130	0	72	0	35.9	0	Normal		Normal		Normal		Normal		Normal		No realizado			2		28/09/2023						No			ND		ND		ND		No
[truncated: 14 more columns]

## Sheet: Visita 4
Centro	Nº de Paciente	Fecha de la visita	¿Se ha registrado algún episodio de diarrea desde la visita anterior?:*	Fecha inicio del episodio	Fecha fin del episodio	Fecha inicio del episodio	Fecha fin del episodio	Peso	Peso. ND	Talla	Talla. ND	IMC (masa/estatura²)	Tensión Arterial. Sistólica	ND	Tensión Arterial. Diastólica	ND	Temperatura	Temperatura. ND	Sistema Cardiovascular	En caso de anormal, describir	Abdomen	En caso de anormal, describir	Exploración neurológica sensitiva	En caso de anormal, describir	Exploración neurológica motora	En caso de anormal, describir	Musculoesquelética y Extremidades	En caso de anormal, describir	Otros	Especificar	En caso de anormal, describir	Hemograma. No realizado	Hemograma. Fecha de realización	Hemoglobina	NR	Unidades	Otras Unidades	CS/NCS	Hematocrito	NR	Unidades	Otras Unidades	CS/NCS	Hematíes	NR	Unidades	Otras Unidades	CS/NCS	Plaquetas
01	01-1
01	01-2	04/05/2022	No					69.8	0	170	0	24.15	144	0	67	0	36.3	0	Normal		Normal		Normal		Normal		Normal		No realizado				04/05/2022	14.9	0	g/dl		NCS	46.5	0	%		NCS	4.99	0	x10^6/µl		NCS	213
01	01-3	05/09/2022	No					53.5	0	162	0	20.39	112	0	90	0	36.3	0	Normal		Normal		Normal		Normal		Normal		No realizado				05/09/2022	15.3	0	g/dl		NCS	49	0	%		NCS	5.13	0	x10^6/µl		NCS	239
01	01-4
01	01-5	21/04/2023	No					76	0	168	0	26.93	126	0	74	0	36.4	0	Normal		Normal		Normal		Normal		Normal		Normal	ninguno			21/04/2023	13.9	0	g/dl		NCS	40.8	0	%		NCS	4.41	0	x10^6/µl		NCS	310
01	01-6	19/04/2023	No					55	0	163	0	20.7	106	0	58	0		1	Anormal	systolic murmur at junction between flank and left iliac fossa	Normal		Normal		Normal		Normal		Normal	ninguno			19/04/2023	11	0	g/dl		NCS	35.8	0	%		NCS	5.56	0	x10^6/µl		NCS	243
01	01-7	25/07/2023	No					64.5	0	158	0	25.84	115	0	70	0	36.2	0	Normal		Normal		Normal		Normal		Normal		No realizado				25/07/2023	11.8	0	g/dl		NCS	36.7	0	%		NCS	3.91	0	x10^6/µl		NCS	415
01	01-8	31/10/2023	No					57	0	173	0	19.05	130	0	83	0	36.2	0	Normal		Normal		Normal		Normal		Normal		No realizado				31/10/2023	13.7	0	g/dl		NCS	42.2	0	%		NCS	4.27	0	x10^6/µl		NCS	203
03	03-1	27/06/2022	Sí	18/06/2022	25/06/2022			61.05	0	162	0	23.26	99	0	57	0		1	Normal		Normal		Normal		Normal		Anormal	Edema de MMII con fóvea pretibial	No realizado				27/06/2022	11.3	0	x10^6/µl		NCS	34.1	0	%		NCS	4.21	0	x10^3/µl		NCS	370
03	03-2	16/09/2022	No					40.4	0	144	0	19.48	139	0	72	0		1	Normal		Normal		Normal		Normal		Normal		Anormal	Fovéa MMI	NCS		16/09/2022	11.7	0	g/dl		NCS	35.2	0	%		NCS	3.62	0	x10^6/µl		NCS	270
03	03-3	13/03/2023	No					44.7	0	156	0	18.37	100	0	60	0	35.4	0	Normal		Normal		Normal		Normal		Normal		No realizado				13/03/2023	13.5	0	g/dl		NCS	42	0	%		NCS	4.8	0	x10^6/µl		NCS	163
03	03-4	17/05/2023	No					73	0	155	0	30.39	160	0	71	0	36.2	0	Normal		Normal		Normal		Normal		Normal		No realizado				17/05/2023	11.6	0	g/dl		NCS	34.2	0	%		NCS	3.6	0	x10^6/µl		NCS	196
03	03-5
04	04-1							84	0	171	0	28.73
05	05-1	11/04/2023	No					50	0	165	0	18.37	96	0	63	0		1	Normal		Normal		Normal		Normal		Normal		No realizado				11/04/2023	134	0	g/l		NCS	0.41	0	Otras	L/L	NCS	4.51	0	Otras	x10^12/L	NCS	244
05	05-2	19/06/2023	No					55	0	154	0	23.19	131	0	62	0	35.4	0	Anormal	insuficiencia mitral	Normal		Normal		Normal		Normal		No realizado				19/06/2023	124	0	g/l		NCS	40	0	%		NCS	4.57	0	x10^6/µl		NCS	222
05	05-3	01/12/2023	No					66.5	0	168	0	23.56	126	0	69	0	35.6	0	Normal		Normal		Normal		Normal		Normal		No realizado				01/12/2023	116	0	g/l		NCS	0.36	0	Otras	L/L	NCS	3.88	0	Otras	10^12/L	NCS	250
06	06-2	11/07/2022	No					98	0	149	0	44.14	152	0	83	0	36.4	0	Normal		Normal		Normal		Normal		Normal		No realizado				11/07/2022	10.6	0	g/dl		NCS	33.9	0	%		NCS	3.51	0	x10^6/µl		NCS	398
06	06-3	16/08/2022	Sí					70	0	168	0	24.8	181	0	92	0	35.4	0	Normal		Normal		Normal		Normal		Normal		No realizado				16/08/2022	12.6	0	g/dl		NCS	37.3	0	%		NCS	3.98	0	x10^6/µl		NCS	190
06	06-4	05/09/2023	Sí	28/08/2023	ND/ND/ND
06	06-5	25/09/2023	No					70	0	169	0	24.51	128	0	81	0	36.6	0	Normal		Normal		Normal		Normal		Normal		No realizado				18/09/2023	13.7	0	g/dl		NCS	41.1	0	%		NCS	4.19	0	x10^6/µl		NCS	111
07	07-1	27/05/2022	No					46	0	152	0	19.91	125	0	61	0		1	Anormal	soplo	Normal		Normal		Normal		Normal		No realizado				20/05/2022	15.6	0	g/dl		NCS	48	0	%		NCS	4.72	0	x10^3/µl		NCS	412
07	07-2
07	07-3	06/03/2023	Sí	11/02/2023	13/04/2023			57	0	156	0	23.42		1		1		1	Normal		Normal		Normal		Normal		Normal		No realizado				06/03/2023	11.6	0	g/dl		NCS	35.5	0	%		NCS	4	0	x10^6/µl		NCS	364
07	07-4
07	07-5
07	07-6	25/08/2023	No					71.1	0	157	0	28.84	118	0	69	0		1	Normal		Normal		Normal		Normal		Normal		No realizado				25/08/2023	12	0	g/dl		NCS	38	0	%		NCS	4.22	0	x10^6/µl		NCS	313
08	08-1	13/05/2022	Sí	12/05/2023	12/05/2023			66.7	0	167	0	23.92	110	0	65	0	36.7	0	Normal		Normal		Normal		Normal		Normal		Normal	NA			13/05/2022	14.3	0	g/dl		NCS	41.8	0	%		NCS	4.82	0	x10^6/µl		NCS	230
08	08-2
08	08-3	27/02/2023	No					59.4	0	161	0	22.92	131	0	83	0	36.2	0	Normal		Normal		Normal		Normal		Normal		Normal	na			27/02/2023	12.9	0	g/dl		NCS	39.1	0	%		NCS	4.25	0	x10^6/µl		NCS	310
08	08-4	06/03/2023	No					78	0	156	0	32.05	131	0	83	0	36.8	0	Normal		Normal		Normal		Normal		Normal		Normal	na			06/03/2023	13.8	0	g/dl		NCS	40.9	0	%		NCS	4.61	0	x10^6/µl		NCS	188
08	08-5	14/03/2023	Sí	09/02/2023	10/02/2023			60.8	0	157.1	0	24.63	127	0	83	0	36.1	0	Normal		Normal		Normal		Normal		Normal		Normal	na			14/03/2023	13.2	0	g/dl		NCS	37.9	0	%		NCS	4.06	0	x10^6/µl		NCS	285
08	08-6	04/04/2023	No					51.8	0	163	0	19.5	110	0	77	0	36.1	0	Normal		Normal		Normal		Normal		Normal		Normal	na			04/04/2023	12.8	0	g/dl		NCS	38.5	0	%		NCS	4.34	0	x10^6/µl		NCS	230
08	08-7
08	08-8	29/06/2023	No					56.4	0	156.5	0	23.03	104	0	66	0	36.1	0	Normal		Normal		Normal		Normal		Normal		Normal	na			29/06/2023	13.8	0	g/dl		NCS	40.4	0	%		NCS	4.68	0	x10^6/µl		NCS	170
08	08-9	07/07/2023	No					108.6	0	169	0	38.02	114	0	82	0	36.4	0	Normal		Normal		Normal		Normal		Normal		Normal	na			07/07/2023	16.2	0	g/dl		NCS	49	0	%		NCS	5.35	0	x10^6/µl		NCS	327
08	08-10	19/07/2023	No					82	0	177.5	0	26.03	122	0	75	0	35.9	0	Normal		Normal		Normal		Normal		Normal		Normal	na			19/07/2023	14.9	0	g/dl		NCS	44.7	0	%		NCS	4.64	0	x10^6/µl		NCS	135
08	08-11
08	08-12	24/08/2023	No					69.6	0	172	0	23.53	92	0	62	0	36.6	0	Normal		Normal		Normal		Normal		Normal		Normal	na			24/08/2023	12.9	0	g/dl		NCS	36.9	0	%		NCS	4.49	0	x10^6/µl		NCS	210
08	08-13
08	08-14	04/09/2023	No					46.2	0	153	0	19.74	121	0	79	0	36.8	0	Normal		Normal		Normal		Normal		Normal		Normal	na			04/09/2023	13.4	0	g/dl		NCS	39.7	0	%		NCS	4.58	0	x10^6/µl		NCS	296
08	08-15	14/09/2023	No					49.1	0	156	0	20.18	95	0	59	0	36.3	0	Normal		Normal		Normal		Normal		Normal		Normal	na			14/09/2023	13.4	0	g/dl		NCS	39.6	0	%		NCS	4.29	0	x10^6/µl		NCS	241
09	09-4								0		0			0		0		0
09	09-5	20/02/2023	No					78	0	178	0	24.62	125	0	85	0	35.6	0	Normal		Normal		Normal		Normal		Normal		No realizado				21/02/2023	15	0	g/dl		NCS	47.6	0	%		NCS	4.91	0	x10^6/µl		NCS	365
09	09-6	16/02/2023	No					72	0	174	0	23.78	145	0	75	0	36.3	0	Normal		Normal		Normal		Normal		Normal		No realizado				16/02/2023	12.9	0	g/dl		NCS	41.2	0	%		NCS	4.44	0	x10^6/µl		NCS	236
09	09-7	23/02/2023	No					76	0	170	0	26.3	155	0	75	0	35.6	0	Normal		Normal		Normal		Normal		Normal		No realizado				23/02/2023	13.3	0	g/dl		NCS	38.6	0	%		NCS	3.25	0	x10^6/µl		NCS	139
09	09-8	02/03/2023	No						1		1			1		1		1	No realizado		No realizado		No realizado		No realizado		No realizado		No realizado				27/02/2023	13.8	0	g/dl		NCS	39.1	0	%		NCS	4.2	0	x10^6/µl		NCS	165
09	09-9	09/03/2023	No					57	0	148	0	26.02	135	0	70	0	36.3	0	Normal		Normal		Normal		Normal		Normal		No realizado				09/03/2023	12.9	0	g/dl		NCS	39.8	0	%		NCS	4.27	0	x10^6/µl		NCS	212
09	09-10	ND/ND/ND	No						1		1			1		1		1	No realizado		No realizado		No realizado		No realizado		No realizado		No realizado			No realizado
09	09-11
09	09-12	13/04/2023	No					83.3	0	165	0	30.6	135	0	65	0	36.2	0	Normal		Normal		Normal		Normal		Normal		No realizado				13/04/2023	8.5	0	g/dl		NCS	25.2	0	%		NCS	2.32	0	x10^6/µl		NCS	152
09	09-13								0		0			0		0		0
09	09-14	11/05/2023	No					53.2	0	163	0	20.02	130	0	60	0	35.9	0	Normal		Normal		Normal		Normal		Normal		No realizado				09/05/2023	13.8	0	g/dl		NCS	40.4	0	%		NCS	4.07	0	x10^6/µl		NCS	244
09	09-15	18/05/2023	No					73.4	0	158	0	29.4	160	0	70	0	36.4	0	Normal		Normal		Normal		Normal		Normal		No realizado			No realizado
09	09-16	11/05/2023	No					138	0	178	0	43.56	130	0	90	0	36.3	0	Normal		Normal		Normal		Normal		Normal		No realizado				11/05/2023	15.8	0	g/dl		NCS	47.2	0	%		NCS	5.38	0	x10^6/µl		NCS	251
09	09-17	22/06/2023	No					81	0	171	0	27.7	135	0	60	0	36.6	0	Normal		Normal		Normal		Normal		Normal		No realizado				22/06/2023	14.2	0	g/dl		NCS	42.8	0	%		NCS	5.19	0	x10^6/µl		NCS	301
09	09-18
09	09-19	07/08/2023	No					43.2	0	152	0	18.7	120	0	66	0	35.6	0	Normal		Normal		Normal		Normal		Normal		No realizado				07/08/2023	13.7	0	g/dl		NCS	41.7	0	%		NCS	4.17	0	x10^6/µl		NCS	210
09	09-20	16/08/2023	No					63	0	165	0	23.14	136	0	72	0	36.4	0	Normal		Normal		Normal		Normal		Normal		No realizado				11/08/2023	9.4	0	g/dl		NCS	29.1	0	%		NCS	3.25	0	x10^6/µl		NCS	209
09	09-21	01/09/2023	No					66.3	0	164	0	24.65	140	0	85	0	36.3	0	Normal		Normal		Normal		Normal		Normal		No realizado				01/09/2023	11	0	g/dl		NCS	33.3	0	%		NCS	3.42	0	x10^6/µl		NCS	157
09	09-22	11/09/2023	No					59.8	0	146	0	28.05	88	0	71	0	35.8	0	Normal		Normal		Normal		Normal		Normal		No realizado				11/09/2023	14.6	0	g/dl		NCS	44	0	%		NCS	4.93	0	Fracción		NCS	383
09	09-23	02/11/2023	No					58.5	0	149	0	26.35	135	0	55	0	35.9	0	Normal		Normal		Normal		Normal		Normal		No realizado			No realizado			0					0					0
09	09-24	08/11/2023	No						1		1			1		1		1	Normal		Normal		Normal		Normal		Normal		No realizado				07/11/2023	15.2	0	g/dl		NCS	46	0	%		NCS	4.85	0	Fracción		NCS	278
11	11-1
11	11-2	20/02/2023	No					65.8	0	156.5	0	26.87	99	0	48	0	36.6	0	Normal		Normal		Normal		Normal		Normal		Normal	AP: MVC // AC: ritmico			20/02/2023	11.2	0	g/dl		NCS	33.6	0	%		NCS	3.76	0	x10^6/µl		NCS	329
11	11-3	07/03/2023	No					70.4	0	163	0	26.5	131	0	84	0	35.7	0	Normal		Normal		No realizado		Normal		No realizado		Normal	AC: ritmico. AP: MVC			07/03/2023	14.6	0	g/dl		NCS	44.7	0	%		NCS	4.76	0	x10^6/µl		NCS	300
11	11-4	14/03/2023	No					66.8	0	165.5	0	24.39	146	0	81	0		1	Normal		Normal		Normal		Normal		Normal		Normal	AC: ritmica. AP: MVC			14/03/2023	13.2	0	g/dl		NCS	41.4	0	%		NCS	4.54	0	x10^6/µl		NCS	300
11	11-5	21/03/2023	No					70	0	156	0	28.76	105	0	58	0	35.3	0	Normal		Normal		No realizado		Normal		No realizado		Normal	AC: arritmica. AP: MVC			21/03/2023	13.2	0	g/dl		NCS	39	0	%		NCS	3.86	0	x10^6/µl		NCS	181
11	11-6	09/05/2023	No					69.4	0	178	0	21.9	128	0	83	0	35.4	0	Normal		Normal		No realizado		No realizado		No realizado		No realizado				09/05/2023	13.4	0	g/dl		NCS	41.8	0	%		NCS	4.47	0	x10^6/µl		NCS	278
11	11-7	11/07/2023	No					63.1	0	154	0	26.61	101	0	71	0	34	0	Normal		Normal		Normal		Normal		Normal		No realizado				11/07/2023	15.1	0	g/dl		NCS	46.6	0	%		NCS	4.93	0	x10^6/µl		NCS	130
11	11-8
11	11-9	12/09/2023	No					62	0	166	0	22.5	106	0	61	0	35.3	0	Normal		Normal		Normal		Normal		Normal		No realizado				12/09/2023	11.6	0	g/dl		NCS	35.4	0	%		NCS	4.53	0	x10^6/µl		NCS	275
11	11-10	19/09/2023	No					82.5	0		1	4209.18	146	0	88	0	35.2	0	Normal		Normal		Normal		Normal		Normal		No realizado				19/09/2023	16.1	0	g/dl		NCS	49.7	0	%		NCS	4.95	0	x10^6/µl		NCS	288
11	11-11	03/10/2023	Sí	29/09/2023	29/09/2023			53	0	161	0	20.45	111	0	71	0	34.4	0	Normal		Normal		Normal		Normal		Normal		No realizado				03/10/2023	13	0	Otras	g/dl	NCS	38.4	0	%		NCS	3.97	0	x10^6/µl		NCS	273
11	11-12	24/10/2023	No					53	0	161	0	20.45	165	0	99	0	35.6	0	Normal		Normal		Normal		Normal		Normal		No realizado				24/10/2023	14	0	g/dl		NCS	42.2	0	%		NCS	4.04	0	x10^6/µl		NCS	275
12	12-1	22/06/2022	Sí	28/05/2022	ND/ND/ND			48.6	0	154	0	20.49	155	0	85	0	34.6	0	Normal		Normal		Normal		Normal		Normal		Normal	NR			17/06/2022	14.2	0	g/dl		NCS	43.5	0	%		NCS	4.47	0	x10^6/µl		NCS	394
13	13-1	27/10/2023	No					44.5	0	150	0	19.78	90	0	55	0	36.2	0	Normal		Normal		Normal		Normal		Normal		No realizado				27/10/2023	7.9	0	g/dl		CS	23.8	0	%		CS	3.05	0	Células/ mm^3		NCS	297
16	16-1								0		0			0		0		0
17	17-1
17	17-2	01/06/2022	No					106	0	151	0	46.49	144	0	94	0		1	Normal		Normal		Normal		Normal		Normal		Normal	NA			01/06/2022	14.6	0	g/dl		NCS	47	0	%		NCS	4.99	0	x10^6/µl		NCS	315
17	17-3
17	17-4
17	17-5
17	17-6	22/05/2023	No					66	0	155	0	27.47	130	0	62	0	36.6	0	Normal		Normal		Normal		Normal		Normal		No realizado				22/05/2022	12	0	g/dl		NCS	39	0	%		NCS	4.37	0	x10^6/µl		NCS	318
18	18-1
18	18-2
18	18-3
20	20-1
20	20-2
21	21-1	09/02/2023	No					73.4	0	180	0	22.65	133	0	67	0	35.2	0	Normal		Normal		Normal		Normal		Normal		No realizado				09/02/2023	12.6	0	g/dl		NCS	38.5	0	%		NCS	4.5	0	x10^6/µl		NCS	190
21	21-2	28/02/2023	No					118	0	183	0	35.24	164	0	90	0	35.2	0	Normal		Normal		Normal		Normal		Normal		No realizado				28/02/2023	13.9	0	g/dl		NCS	43.8	0	%		NCS	4.5	0	x10^6/µl		NCS	286
21	21-3	16/08/2023	No					71	0	167	0	25.46	151	0	90	0	36.2	0	Normal		Normal		Normal		Normal		Normal		No realizado				16/08/2023	15.6	0	g/dl		NCS	46.3	0	%		NCS	4.9	0	x10^6/µl		NCS	163
21	21-4	06/11/2023	No					62.1	0	151.5	0	27.06	134	0	60	0	35.5	0	Normal		Normal		Normal		Normal		Normal		No realizado				06/11/2023	13.5	0	g/dl		NCS	42.6	0	%		NCS	4.4	0	x10^6/µl		NCS	237
[truncated: 266 more columns]

## Sheet: Visita 5
Centro	Nº de Paciente	Fecha de la visita	¿Se ha registrado algún episodio de diarrea desde la visita anterior?:*	Fecha inicio del episodio	Fecha fin del episodio	Fecha inicio del episodio	Fecha fin del episodio	Número de deposiciones/24h	No recogido/No disponible	Fecha de las deposiciones	Número de días de duración del episodio de diarrea	No recogido/No disponible	Fecha de inicio del episodio	Fecha de fin del episodio	Continúa	¿Ha estado hospitalizado el paciente?	En caso afirmativo. Fecha de ingreso	Fecha de alta	Recuento leucocitario	CS/NCS	Proteína C reactiva (PCR)	CS/NCS	Nivel de creatinina sérica	CS/NCS	¿Se ha producido shock séptico?	En caso afirmativo, Fecha	¿Ha habido íleo o megacolon?	En caso afirmativo, Fecha	¿Ha sido el paciente ingresado en la UCI?	En caso afirmativo, Fecha de ingreso	Fecha de alta	¿Se ha producido recurrencia?	En caso afirmativo, Fecha	¿Ha tomado el paciente alguna medicación concomitante desde la última visita?	¿Ha sufrido el paciente algún acontecimiento adverso relevante desde la última visita?
01	01-1
01	01-2	26/05/2022	No					2		25/05/2022						No			ND		ND		ND		No		No		No			No		No	No
01	01-3	30/09/2022	No					2		29/09/2022						No			ND		ND		ND		No		No		No			No		No	No
01	01-4
01	01-5	16/05/2023	No					2		15/05/2023						No			ND		ND		ND		No		No		No			No		No	No
01	01-6	23/05/2023	No					2		22/05/2023						No			ND		ND		ND		No		No		No			No		Sí	No
01	01-7	22/08/2023	No						No disponible			No disponible				No			ND		ND		ND		No		No		No			No		No	No
01	01-8	05/12/2023	No					2		04/12/2023						No			ND		ND		ND		No		No		No			No		No	No
03	03-1
03	03-2
03	03-3	03/05/2023	Sí	19/04/2023	ND/ND/ND			5		03/05/2023	15		19/04/2023		Si	No			ND		ND		ND		No		No		No			No		No	No
03	03-4	23/06/2023	No						No disponible			No recogido				No			ND		ND		ND		No		No		No			No		No	No
03	03-5
04	04-1
05	05-1	17/05/2023	No					2		17/05/2023						No			ND		ND		ND		No		No		No			No		No	No
05	05-2
05	05-3
06	06-2																																	No	No
06	06-3																																	No	No
06	06-4
06	06-5	16/10/2023	No						No disponible			No disponible				No			ND		ND		ND		No		No		No			No		Sí	No
07	07-1	27/06/2022	No					2		27/06/2022						No			ND		ND		ND		No		No		No			No		No	No
07	07-2
07	07-3
07	07-4
07	07-5
07	07-6	22/09/2023	No					1		20/09/2023						No			ND		ND		ND		No		No		No			No		No	No
08	08-1	13/06/2022	No					1		12/06/2022						No			ND		ND		ND		No		No		No			No		No	No
08	08-2
08	08-3	27/03/2023	Sí	22/03/2023	23/03/2023			4		22/03/2023	1		22/03/2023	23/03/2023		No			ND		ND		ND		No		No		No			No		No	Sí
08	08-4	03/04/2023	No					3		02/02/2023		No recogido				No			ND		ND		ND		No		No		No			No		No	No
08	08-5
08	08-6	09/05/2023	No					2		08/05/2023						No			ND		ND		ND		No		No		No			No		Sí	Sí
08	08-7
08	08-8	28/07/2023	No					1		27/07/2023						No			ND		ND		ND		No		No		No			No		No	No
08	08-9	08/08/2023	No					1		07/08/2023						No			ND		ND		ND		No		No		No			No		Sí	Sí
08	08-10	18/08/2023	No					1		17/08/2023						No			ND		ND		ND		No		No		No			No		Sí	Sí
08	08-11
08	08-12	22/09/2023	No					1		21/09/2023						No			ND		ND		ND		No		No		No			No		No	No
08	08-13
08	08-14	29/09/2023	No					1		28/09/2023						No			ND		ND		ND		No		No		No			No		No	No
08	08-15	16/10/2023	No					1		15/10/2023						No			ND		ND		ND		No		No		No			No		No	No
09	09-4
09	09-5	09/03/2023	No					1		09/03/2023						No			ND		ND		ND		No		No		No			No		Sí	No
09	09-6	16/03/2023	No					1		16/03/2023						No			ND		ND		ND		No		No		No			No		Sí	No
09	09-7	27/04/2023	No					1		27/04/2023						No			5.4	NCS	3.55	NCS	0.58	NCS	No		No		No			No		No	No
09	09-8
09	09-9
09	09-10	04/05/2023	No					0		ND/ND/ND						No			ND		ND		ND		No		No		No			No		Sí	No
09	09-11
09	09-12
09	09-13
09	09-14	15/06/2023	No					1		ND/ND/ND						No			ND		ND		ND		No		No		No			No		Sí	Sí
09	09-15	15/06/2023	No					1		ND/ND/ND						No			ND		ND		1.47	NCS	No		No		No			No		Sí	No
09	09-16	15/06/2023	No					0		ND/ND/ND						No			ND		ND		ND		No		No		No			No		Sí	No
09	09-17	07/09/2023	No					1		ND/ND/ND						No			ND		ND		ND		No		No		No			No		No	No
09	09-18
09	09-19	15/09/2023	No					1		15/09/2023						No			ND		ND		ND		No		No		No			No		No	No
09	09-20	25/09/2023	No					1		ND/ND/ND						No			ND		ND		ND		No		No		No			No		Sí	Sí
09	09-21	06/10/2023	No					1		ND/ND/ND						No			ND		ND		ND		No		No		No			No		No	No
09	09-22	05/10/2023	No					1		05/10/2023						No			ND		ND		ND		No		No		No			No		No	No
09	09-23
09	09-24
11	11-1
11	11-2	28/03/2023	No					1		ND/ND/ND						No			ND		ND		ND		No		No		No			No		Sí	No
11	11-3	04/04/2023	No					1		ND/ND/ND						No			ND		ND		ND		No		No		No			No		Sí	No
11	11-4	19/04/2023	No					2		ND/ND/ND						No			ND		ND		ND		No		No		No			No		No	No
11	11-5	25/04/2023	No					1		ND/ND/ND						No			ND		ND		ND		No		No		No			No		Sí	No
11	11-6	13/06/2023	No					1		ND/ND/ND						No			ND		ND		ND		No		No		No			No		No	No
11	11-7	11/08/2023	No					1		ND/ND/ND						No			ND		ND		ND		No		No		No			No		No	No
11	11-8
11	11-9	17/10/2023	No					1		ND/ND/ND						No			ND		ND		ND		No		No		No			No		Sí	Sí
11	11-10	24/10/2023	No					1		ND/ND/ND						No			ND		ND		ND		No		No		No			No		No	No
11	11-11	07/11/2023	No					1		ND/ND/ND						No			ND		ND		ND		No		No		No			No		No	No
11	11-12	12/12/2023	No					2		ND/ND/ND						No			ND		ND		ND		No		No		No			No		No	No
12	12-1
13	13-1	01/12/2023	No					2		ND/ND/ND						No			ND		ND		ND		No		No		No			No		Sí	Sí
16	16-1
17	17-1
17	17-2
17	17-3
17	17-4
17	17-5
17	17-6
18	18-1
18	18-2
18	18-3
20	20-1
20	20-2
21	21-1	15/03/2023	No					0		ND/ND/ND						No			ND		ND		ND		No		No		No			No		Sí	No
21	21-2	05/04/2023	No					0		ND/ND/ND						No			ND		ND		ND		No		No		No			No		No	No
21	21-3	12/09/2023	No						No recogido		0		ND/ND/ND	ND/ND/ND		No			ND		ND		ND		No		No		No			No		No	No
21	21-4	ND/ND/ND

## Sheet: Visita 6
Centro	Nº de Paciente	Fecha de la visita	¿Se ha registrado algún episodio de diarrea desde la visita anterior?:*	Fecha inicio del episodio	Fecha fin del episodio	Número de deposiciones/24h	No recogido/No disponible	Fecha de las deposiciones	Número de días de duración del episodio de diarrea	No recogido/No disponible	Fecha de inicio del episodio	Fecha de fin del episodio	Continúa	¿Ha estado hospitalizado el paciente?	En caso afirmativo. Fecha de ingreso	Fecha de alta	Recuento leucocitario	CS/NCS	Proteína C reactiva (PCR)	CS/NCS	Nivel de creatinina sérica	CS/NCS	¿Se ha producido shock séptico?	En caso afirmativo, Fecha	¿Ha habido íleo o megacolon?	En caso afirmativo, Fecha	¿Ha sido el paciente ingresado en la UCI?	En caso afirmativo, Fecha de ingreso	Fecha de alta	¿Se ha producido recurrencia?	En caso afirmativo, Fecha	¿Se ha realizado el test SF-36?	En caso afirmativo, fecha	En caso negativo, especificar	1. En general, usted diría que su salud es	2. ¿Cómo diría usted que es su salud, comparada con la de hace un año?	3. Las siguientes preguntas se refieren a actividades o cosas que usted podría hacer en un día normal. Su salud actual, ¿le limita para hacer esas actividades o cosas? Si es así, ¿cuánto?. a. Esfuerzos intensos, tales como correr, levantar objetos pesados, o participar en deportes agotadores.	b. Esfuerzos moderados, como mover una mesa, pasar la aspiradora, jugar a los bolos o caminar más de 1 hora.	c. Coger o llevar una bolsa de la compra.	d. Subir varios pisos por la escalera.	e. Subir un solo piso por la escalera.	f. Agacharse o arrodillarse.	g. Caminar un kilómetro o más.	h. Caminar varios centenares de metros.	i. Caminar unos 100 metros.	j. Bañarse o vestirse por sí mismo.	4. Durante las 4 últimas semanas, ¿con qué frecuencia ha tenido alguno de los siguientes problemas en su trabajo en sus actividades cotidianas, a causa de su salud física?. a. ¿Tuvo que reducir el tiempo dedicado al trabajo o a sus actividades cotidianas?	b. ¿Hizo menos de lo que hubiera querido hacer?	c. ¿Tuvo que dejar de hacer algunas tareas en su trabajo o en sus actividades cotidianas?
01	01-1
01	01-2	22/08/2022	No			2		21/08/2022						No			ND		ND		ND		No		No		No			No		No		por error
01	01-3	27/12/2022	No				No disponible			No recogido				No			ND		ND		ND		No		No		No			No		No		Por error
01	01-4
01	01-5	22/08/2023	No			2		21/08/2023						No			ND		ND		ND		No		No		No			No		Sí	22/08/2023		Muy buena	Mucho mejor ahora que hace un año	No, no me limita nada	No, no me limita nada	No, no me limita nada	No, no me limita nada	No, no me limita nada	No, no me limita nada	No, no me limita nada	No, no me limita nada	No, no me limita nada	No, no me limita nada	Nunca	Nunca	Nunca
01	01-6	22/08/2023	No			2		21/08/2023						No			ND		ND		ND		No		No		No			No		Sí	22/08/2023		Muy buena	Algo mejor ahora que hace un año	No, no me limita nada	No, no me limita nada	No, no me limita nada	No, no me limita nada	No, no me limita nada	No, no me limita nada	No, no me limita nada	No, no me limita nada	No, no me limita nada	No, no me limita nada	Nunca	Nunca	Nunca
01	01-7	14/11/2023	No				No disponible			No recogido				No			ND		ND		ND		No		No		No			No		Sí	14/11/2023		Muy buena	Mucho mejor ahora que hace un año	No, no me limita nada	No, no me limita nada	No, no me limita nada	Sí, me limita un poco	No, no me limita nada	Sí, me limita un poco	No, no me limita nada	No, no me limita nada	No, no me limita nada	No, no me limita nada	Nunca	Nunca	Nunca
01	01-8	ND/ND/ND
03	03-1
03	03-2
03	03-3	31/07/2023	No			4		31/07/2023		No recogido				No			ND		ND		ND		No		No		No			No		No		telephone visit
03	03-4	25/09/2023	No				No disponible			No recogido				No			ND		ND		ND		No		No		No			No		No		visita telefónica
03	03-5
04	04-1
05	05-1	17/08/2023	No							No recogido				No			ND		ND		ND		No		No		No			No		Sí	17/08/2023		Muy buena	Algo mejor ahora que hace un año	No, no me limita nada	No, no me limita nada	No, no me limita nada	No, no me limita nada	No, no me limita nada	No, no me limita nada	No, no me limita nada	No, no me limita nada	No, no me limita nada	No, no me limita nada	Nunca	Nunca	Nunca
05	05-2
05	05-3
06	06-2
06	06-3
06	06-4
06	06-5
07	07-1	26/09/2022	No			2		ND/ND/ND						No			ND		ND		ND		No		No		No			No		Sí	26/09/2022		Buena	Algo mejor ahora que hace un año	Sí, me limita mucho	No, no me limita nada	Sí, me limita un poco	No, no me limita nada	No, no me limita nada	No, no me limita nada	Sí, me limita un poco	Sí, me limita mucho	Sí, me limita un poco	Sí, me limita un poco	Nunca	Nunca	Nunca
07	07-2
07	07-3
07	07-4
07	07-5
07	07-6
08	08-1	02/09/2022	No			1		02/09/2022						No			ND		ND		ND		No		No		No			No		Sí	02/09/2022		Regular	Mucho mejor ahora que hace un año	Sí, me limita un poco	No, no me limita nada	Sí, me limita un poco	No, no me limita nada	No, no me limita nada	Sí, me limita un poco	No, no me limita nada	No, no me limita nada	No, no me limita nada	No, no me limita nada	Nunca	Siempre	Siempre
08	08-2
08	08-3
08	08-4	27/06/2023	No			2		26/06/2023						No			5.6	NCS	ND		0.88	NCS	No		No		No			No		Sí	27/06/2023		Buena	Más o menos igual que hace un año	Sí, me limita un poco	Sí, me limita un poco	Sí, me limita un poco	Sí, me limita un poco	Sí, me limita un poco	Sí, me limita mucho	No, no me limita nada	No, no me limita nada	No, no me limita nada	No, no me limita nada	Casi siempre	Siempre	Casi siempre
08	08-5
08	08-6
08	08-7
08	08-8	20/10/2023	No			1		19/10/2023						No			ND		ND		ND		No		No		No			No		Sí	20/10/2023		Muy buena	Mucho mejor ahora que hace un año	No, no me limita nada	No, no me limita nada	Sí, me limita un poco	Sí, me limita un poco	No, no me limita nada	No, no me limita nada	No, no me limita nada	No, no me limita nada	No, no me limita nada	No, no me limita nada	Sólo alguna vez	Sólo alguna vez	Sólo alguna vez
08	08-9	27/10/2023	No			1		26/10/2023						No			ND		ND		ND		No		No		No			No		Sí	27/10/2023		Buena	Más o menos igual que hace un año	No, no me limita nada	No, no me limita nada	No, no me limita nada	No, no me limita nada	No, no me limita nada	Sí, me limita un poco	No, no me limita nada	No, no me limita nada	No, no me limita nada	No, no me limita nada	Sólo alguna vez	Sólo alguna vez	Nunca
08	08-10	10/11/2023	No			1		09/11/2023						No			ND		ND		ND		No		No		No			No		Sí	10/11/2023		Muy buena	Más o menos igual que hace un año	No, no me limita nada	No, no me limita nada	No, no me limita nada	No, no me limita nada	No, no me limita nada	No, no me limita nada	No, no me limita nada	No, no me limita nada	No, no me limita nada	No, no me limita nada	Nunca	Nunca	Nunca
08	08-11
08	08-12
08	08-13
08	08-14
08	08-15
09	09-4
09	09-5	15/06/2023	No			1		ND/ND/ND						No			ND		ND		ND		No		No		No			No		Sí	15/06/2023		Muy buena	Algo mejor ahora que hace un año	Sí, me limita un poco	No, no me limita nada	No, no me limita nada	No, no me limita nada	No, no me limita nada	No, no me limita nada	No, no me limita nada	No, no me limita nada	No, no me limita nada	No, no me limita nada	Nunca	Nunca	Nunca
09	09-6	15/06/2023	No			1		ND/ND/ND						No			ND		ND		ND		No		No		No			No		Sí	15/06/2023		Buena	Algo mejor ahora que hace un año	Sí, me limita mucho	Sí, me limita mucho	Sí, me limita un poco	Sí, me limita mucho	Sí, me limita un poco	Sí, me limita un poco	Sí, me limita un poco	No, no me limita nada	No, no me limita nada	No, no me limita nada	Algunas veces	Algunas veces	Algunas veces
09	09-7	29/06/2023	No			1		29/06/2023						No			ND		ND		ND		No		No		No			No		No		consulta telefónica
09	09-8
09	09-9
09	09-10	15/06/2023	No			2		15/06/2023						No			ND		ND		ND		No		No		No			No		Sí	15/06/2023		Buena	Más o menos igual que hace un año	Sí, me limita mucho	Sí, me limita un poco	No, no me limita nada	Sí, me limita un poco	No, no me limita nada	No, no me limita nada	No, no me limita nada	No, no me limita nada	No, no me limita nada	No, no me limita nada	Sólo alguna vez	Sólo alguna vez	Sólo alguna vez
09	09-11
09	09-12
09	09-13
09	09-14	14/09/2023	No			1		14/09/2023						No			ND		ND		ND		No		No		No			No		Sí	14/09/2023		Regular	Algo mejor ahora que hace un año	Sí, me limita mucho	Sí, me limita mucho	Sí, me limita un poco	Sí, me limita un poco	No, no me limita nada	Sí, me limita un poco	Sí, me limita un poco	Sí, me limita un poco	No, no me limita nada	No, no me limita nada	Algunas veces	Casi siempre	Algunas veces
09	09-15	25/09/2023	No				No recogido			No recogido				Sí	16/07/2023	24/07/2023	ND		ND		ND		No		No		No			No		No		el paciente no desea realizarlo
09	09-16	14/09/2023	No			1		ND/ND/ND						No			ND		ND		ND		No		No		No			No		Sí	14/09/2023		Regular	Mucho peor ahora que hace un año	Sí, me limita mucho	Sí, me limita mucho	Sí, me limita un poco	Sí, me limita mucho	Sí, me limita un poco	Sí, me limita mucho	Sí, me limita mucho	Sí, me limita mucho	Sí, me limita un poco	Sí, me limita un poco	Siempre	Siempre	Siempre
09	09-17	06/11/2023	No			1		06/11/2023						No			ND		ND		ND		No		No		No			No		No		se encuentra trabajando fuera del país
09	09-18
09	09-19
09	09-20
09	09-21
09	09-22
09	09-23
09	09-24
11	11-1
11	11-2	04/07/2023	No			1		ND/ND/ND						No			ND		ND		ND		No		No		No			No		Sí	04/07/2023		Muy buena	Algo mejor ahora que hace un año	No, no me limita nada	No, no me limita nada	No, no me limita nada	No, no me limita nada	No, no me limita nada	No, no me limita nada	No, no me limita nada	No, no me limita nada	No, no me limita nada	No, no me limita nada	Sólo alguna vez	Sólo alguna vez	Nunca
11	11-3	04/07/2023	No			2		ND/ND/ND						No			ND		ND		ND		No		No		No			No		Sí	04/07/2023		Muy buena	Mucho mejor ahora que hace un año	Sí, me limita un poco	No, no me limita nada	Sí, me limita un poco	Sí, me limita un poco	No, no me limita nada	Sí, me limita un poco	No, no me limita nada	No, no me limita nada	No, no me limita nada	No, no me limita nada	Nunca	Sólo alguna vez	Nunca
11	11-4	19/07/2023	No			2		ND/ND/ND						No			ND		ND		ND		No		No		No			No		Sí	19/07/2023		Muy buena	Más o menos igual que hace un año	No, no me limita nada	Sí, me limita un poco	No, no me limita nada	Sí, me limita un poco	No, no me limita nada	Sí, me limita un poco	No, no me limita nada	No, no me limita nada	No, no me limita nada	No, no me limita nada	Sólo alguna vez	Sólo alguna vez	Sólo alguna vez
11	11-5	27/07/2023	No			1		ND/ND/ND						No			ND		ND		ND		No		No		No			No		Sí	27/07/2023		Regular	Algo peor ahora que hace un año	Sí, me limita mucho	Sí, me limita mucho	Sí, me limita mucho	Sí, me limita mucho	Sí, me limita mucho	Sí, me limita un poco	Sí, me limita mucho	Sí, me limita mucho	Sí, me limita un poco	Sí, me limita un poco	Casi siempre	Casi siempre	Casi siempre
11	11-6	12/09/2023	No			1		ND/ND/ND						No			ND		ND		ND		No		No		No			No		Sí	12/09/2023		Muy buena	Algo mejor ahora que hace un año	No, no me limita nada	No, no me limita nada	No, no me limita nada	No, no me limita nada	No, no me limita nada	No, no me limita nada	No, no me limita nada	No, no me limita nada	No, no me limita nada	No, no me limita nada	Nunca	Nunca	Nunca
11	11-7	14/11/2023	No			1		ND/ND/ND						No			ND		ND		ND		No		No		No			No		Sí	14/11/2023		Muy buena	Algo mejor ahora que hace un año	Sí, me limita un poco	No, no me limita nada	No, no me limita nada	Sí, me limita un poco	No, no me limita nada	No, no me limita nada	No, no me limita nada	No, no me limita nada	No, no me limita nada	No, no me limita nada	Sólo alguna vez	Sólo alguna vez	Nunca
11	11-8
11	11-9
11	11-10
11	11-11
11	11-12
12	12-1
13	13-1	ND/ND/ND
16	16-1
17	17-1
17	17-2
17	17-3
17	17-4
17	17-5
17	17-6
18	18-1
18	18-2
18	18-3
20	20-1
20	20-2
21	21-1	07/06/2023	No				No recogido			No recogido				No			ND		ND		ND		No		No		No			No		Sí	07/06/2023		Mala	Algo mejor ahora que hace un año	Sí, me limita mucho	Sí, me limita un poco	Sí, me limita un poco	Sí, me limita mucho	Sí, me limita un poco	Sí, me limita un poco	Sí, me limita mucho	Sí, me limita mucho	Sí, me limita un poco	No, no me limita nada	Sólo alguna vez	Algunas veces	Algunas veces
21	21-2	27/06/2023	No				No disponible			No recogido				No			ND		ND		ND		No		No		No			No		Sí	27/06/2023		Muy buena	Mucho mejor ahora que hace un año	No, no me limita nada	No, no me limita nada	No, no me limita nada	No, no me limita nada	No, no me limita nada	No, no me limita nada	No, no me limita nada	No, no me limita nada	No, no me limita nada	No, no me limita nada	Nunca	Nunca	Nunca
21	21-3	ND/ND/ND
21	21-4	ND/ND/ND
[truncated: 23 more columns]

## Sheet: Visita No Programada
Centro	Nº de Paciente	Nº Visita	Fecha de la visita	¿Cuál ha sido el motivo de la visita?	¿Se ha registrado algún episodio de diarrea desde la visita anterior?:*	Fecha inicio del episodio	Fecha fin del episodio	Fecha inicio del episodio	Fecha fin del episodio	Peso	Peso. ND	Talla	Talla. ND	IMC (masa/estatura²)	Tensión Arterial. Sistólica	ND	Tensión Arterial. Diastólica	ND	Temperatura	Temperatura. ND	Sistema Cardiovascular	En caso de anormal, describir	Abdomen	En caso de anormal, describir	Exploración neurológica sensitiva	En caso de anormal, describir	Exploración neurológica motora	En caso de anormal, describir	Musculoesquelética y Extremidades	En caso de anormal, describir	Otros	Especificar	En caso de anormal, describir	Hemograma. No realizado	Hemograma. Fecha de realización	Hemoglobina	NR	Unidades	Otras Unidades	CS/NCS	Hematocrito	NR	Unidades	Otras Unidades	CS/NCS	Hematíes	NR	Unidades	Otras Unidades
01	01-1	1	10/11/2021	Recurrencia por clostridium mas sepsis (SAE)	Sí	09/11/2021	ND/ND/ND				1		1			1		1		1	No realizado		No realizado		No realizado		No realizado		No realizado		No realizado			No realizado
01	01-2
01	01-3
01	01-4
01	01-5
01	01-6
01	01-7
01	01-8
03	03-1	1	23/06/2022	Llama la hija por presentar el paciente diarrea significativa	Sí	18/06/2022	25/06/2022				1		1			1		1		1	No realizado		No realizado		No realizado		No realizado		No realizado		No realizado			No realizado
03	03-2	2	17/08/2022	Revisión tras ingreso por nuevo episodio de CD	Sí	27/07/2022	05/08/2022			54	0	162	0	20.58	93	0	62	0		1	No realizado		No realizado		No realizado		No realizado		No realizado		No realizado			No realizado
03	03-3	1	28/11/2022	Llamada telefónica para informar de la retirada del estudio	No						1		1			1		1		1	No realizado		No realizado		No realizado		No realizado		No realizado		No realizado			No realizado
03	03-4
03	03-5
04	04-1
05	05-1	1	05/05/2022	Diarrea	Sí	11/04/2022	26/05/2022				1		1			1		1		1	No realizado		Anormal	dolor abdominal	No realizado		No realizado		No realizado		No realizado			No realizado
05	05-2
06	06-2	1	02/05/2023	Control del episodio de diarreas	No						1		1			1		1		1	No realizado		No realizado		No realizado		No realizado		No realizado		No realizado			No realizado
06	06-3	1	07/09/2022	Pérdida de seguimiento							1		1			1		1		1	No realizado		No realizado		No realizado		No realizado		No realizado		No realizado			No realizado
06	06-4	1	19/07/2022	Toma de medicación prohibida y salida del estudio	Sí	ND/ND/ND	ND/ND/ND				1		1	24.8		1		1		1	Normal		Anormal	dolor abdominal	Normal		Normal		Normal		Anormal	absceso endoanal.	absceso endoanal.		18/07/2022	12.3	0	g/dl		NCS	36.2	0	%		NCS	3.85	0	x10^6/µl
07	07-1	1	05/09/2023	Persistencia de diarrea	Sí	28/08/2023	ND/ND/ND				1		1	21.36		1		1		1	No realizado		No realizado		No realizado		No realizado		No realizado		No realizado			No realizado
07	07-2
07	07-3	1	07/07/2022	empeoramiento clinico, dolor abdominal, aumento deposiciones diarreicas	Sí	02/07/2022	11/07/2022			83	0		1		105	0	65	0	35	0	Normal		Anormal	molestias a la palpación difusa, sin signos de irritación peritoneal. Peristaltismo levemente aumentado, sin ruidos metálicos	Normal		Normal		Normal		Normal	Lesion nodular en zona pretibial derecha compatible con eritema nodoso, muy doloroso a la palpacion			07/07/2022	11.4	0	g/dl		NCS	33.7	0	%		NCS	4.24	0	x10^6/µl
07	07-3	1	07/03/2023	Visita Revisión estado paciente tras cuaro gripal con diarrea - visita telefónica	Sí	11/02/2023	13/04/2023				1		1			1		1		1	No realizado		No realizado		No realizado		No realizado		No realizado		No realizado			No realizado
07	07-3	2	10/03/2023	control evolutivo-visita telefónica	Sí	11/02/2023	13/04/2023				1		1			1		1		1	No realizado		No realizado		No realizado		No realizado		No realizado		No realizado			No realizado
07	07-4	3	15/03/2023	paciente se pone en contacto por empeoramiento a nivel digestivo	Sí	11/02/2023	13/04/2023				1		1			1		1		1	No realizado		No realizado		No realizado		No realizado		No realizado		No realizado			No realizado			0
07	07-5
07	07-6	1	17/05/2023	Visita de fin de estudio, tras haber estado ingresada y haber recibido antibiótico que causo la salida del estudio.	Sí	09/05/2023	19/06/2023				1		1		150	0	75	0		1	Normal		Normal		Normal		Normal		Normal		No realizado				15/05/2023	11.1	0	g/dl		NCS	33.8	0	%		NCS	3.52	0	x10^6/µl
08	08-1
08	08-2
08	08-3	1	04/01/2023	llamada telefonica	Sí	14/12/2022	31/01/2023				1		1			1		1		1	No realizado		No realizado		No realizado		No realizado		No realizado		No realizado			No realizado			0					0					0
08	08-4	1	12/05/2023	llamada telefonica	No						1		1			1		1		1	No realizado		No realizado		No realizado		No realizado		No realizado		No realizado			No realizado
08	08-5
08	08-6
08	08-7
08	08-8	1	10/03/2023	Ausencia de mejoría a los 5 días de la toma del fármaco	Sí	03/03/2023	04/04/2023				1		1			1		1		1	No realizado		No realizado		No realizado		No realizado		No realizado		No realizado			No realizado
08	08-9	1	10/10/2023	llamada telefonica	Sí	02/10/2023	03/10/2023	09/10/2023	10/10/2023		1		1			1		1		1	No realizado		No realizado		No realizado		No realizado		No realizado		No realizado			No realizado
08	08-10
08	08-11
08	08-12	1	09/06/2023	visita extra para dar antibiotico	Sí	17/05/2023	08/06/2023				1		1			1		1		1	No realizado		No realizado		No realizado		No realizado		No realizado		No realizado			No realizado
08	08-13
08	08-14	1	13/07/2023	diarrea persistente por lo que se le da antibiotico	Sí	04/07/2023	17/07/2023				1		1			1		1		1	No realizado		No realizado		No realizado		No realizado		No realizado		No realizado			No realizado
08	08-15
09	09-4
09	09-5
09	09-6
09	09-7
09	09-8
09	09-9	1	15/04/2023	CISTITIS AGUDA	No						1		1			1		1		1	No realizado		No realizado		No realizado		No realizado		No realizado		No realizado			No realizado
09	09-10
09	09-11
09	09-12
09	09-13	1	22/02/2023	por absceso perianal/fascitis necrotizante	No						1		1			1		1		1	No realizado		No realizado		No realizado		No realizado		No realizado		Anormal	Absceso perianal a las 3-6 en LT	Absceso perianal a las 3-6 en LT		22/02/2023	10	0	g/dl		NCS	27.8	0	%		NCS	3	0	x10^6/µl
09	09-14	1	26/05/2023	REACCIÓN INFLAMATORIA A LA PROTESIS EN FORMA DE PANICULITIS	No						1		1			1		1		1	No realizado		No realizado		No realizado		No realizado		No realizado		No realizado				26/05/2023	10.3	0	g/dl		NCS	32	0	%		NCS	4.16	0	x10^6/µl
09	09-15
09	09-16
09	09-17
09	09-18
09	09-19	1	17/05/2023	prostatitis aguda	No						1		1		115	0	63	0		1	No realizado		No realizado		No realizado		No realizado		No realizado		No realizado				16/05/2023	14.1	0	g/dl		NCS	41.5	0	%		NCS	4.71	0	x10^6/µl
09	09-20
09	09-21
09	09-22
09	09-23
09	09-24
11	11-1
11	11-2
11	11-3
11	11-4
11	11-5
11	11-6
11	11-7
11	11-8
11	11-9	1	24/06/2023	Recidiva de la diarrea	Sí	23/06/2023	05/07/2023				1		1		126	0	60	0	35.3	0	Normal		Anormal	Doloroso a la palpación en cuadrantes inferiores. Sin claros signos de irritación peritoneal	Normal		Normal		Normal		No realizado				24/06/2023	15.8	0	g/dl		NCS	47.2	0	%		NCS	5.03	0	x10^6/µl
11	11-10
11	11-11
11	11-12
12	12-1	1	13/09/2023	CONTACTO TELEFONICO. Malestar abdominal con aumento de gases y dps escasa cantidad desde el 07/9.	No						1		1			1		1		1	No realizado		No realizado		No realizado		No realizado		No realizado		No realizado			No realizado
13	13-1
16	16-1
17	17-1	1	03/08/2022	Episodio diarrea	Sí	02/08/2022	10/08/2022				1		1			1		1		1	No realizado		No realizado		No realizado		No realizado		No realizado		No realizado			No realizado
17	17-2
17	17-3
17	17-4
17	17-5
17	17-6	1	04/04/2023	Infección por Clostridium	Sí	20/03/2023	11/05/2023				1		1			1		1		1	No realizado		No realizado		No realizado		No realizado		No realizado		No realizado				04/04/2023	14.8	0	g/dl		NCS	45.5	0	%		NCS	4.9	0	x10^6/µl
18	18-1
18	18-2	1	17/10/2022	diarrea	Sí	15/10/2022	17/10/2022				1		1	34.22		1		1		1	No realizado		No realizado		No realizado		No realizado		No realizado		No realizado				17/10/2022	9.4	0	g/dl		NCS	29.3	0	%		NCS	9.4	0	g/dl
18	18-3
20	20-1	1	06/02/2023	diarrea	Sí	06/02/2023	08/02/2023			56	0	152	0	24.24	152	0	80	0	36.7	0	Normal		Normal		Normal		Normal		Normal		No realizado				06/02/2023	13.2	0	g/dl		NCS	39	0	%		NCS	3.89	0	x10^6/µl
20	20-2
21	21-1	1	10/01/2023	Recidiva de Clostridium difficile	Sí	09/01/2023	15/01/2023				1		1		93	0	71	0	36	0	No realizado		Normal		No realizado		Normal		No realizado		No realizado				09/01/2023	10.1	0	x10^6/µl		NCS		1					1
21	21-2	1	10/01/2023	Acude por presentar desde el día 8/1/23 6 deposiciones diarreicas	Sí	08/01/2023	12/01/2023				1		1			1		1		1	Normal		Normal		Normal		Normal		Normal		No realizado			No realizado
21	21-2	2	26/05/2023	deposiciones diarreicas	Sí	21/05/2023	25/05/2023				1		1			1		1		1	Normal		Normal		Normal		Normal		Normal		No realizado			No realizado
21	21-3	1	30/05/2023	seguimiento deposiciones	No	20/09/2023	ND/ND/ND				1		1			1		1		1	No realizado		No realizado		No realizado		No realizado		No realizado		No realizado			No realizado
21	21-4	1	09/10/2023	deposiciones diarreicas	Sí						1		1			1		1		1	No realizado		No realizado		No realizado		No realizado		No realizado		No realizado			No realizado
[truncated: 227 more columns]

[truncated: 15 more sheets: Hoja Fin de Tratamiento, Hoja Fin de Estudio, Medicación Concomitante, Acontecimientos Adversos, Acontecimientos Adversos Graves, Relación AAG con producto inves, Tratamiento AAG, Producto en Investigación AAG, Tratamiento Concomitante AAG, Datos Laboratorio AAG, Historia Médica AAG, Estado General, Estado Estudio por Centros, Data Cleaning status, CRDs]
