# Supplementary material
Source: Research Square preprint supplement (doi:10.21203/rs.3.rs-7712660/v2)
Supplement: Supplementary file 1 [file af6a2e22ca659c81fcc893cf.docx]

Supplement

**MBK-01 Oral Microbiota Capsules vs Fidaxomicin for *Clostridioides difficile* Infection**

*A Randomized Clinical Trial*

**Contents of This Supplement**

eMethods 1. Complete participant eligibility criteria

eMethods 2. Prohibited medications and major protocol deviations

eResults 1. Quality of life (SF-36)

eTable 1. Stool donor inclusion criteria for MBK-01 manufacture

eTable 2. Stool donor exclusion criteria for MBK-01 manufacture

eTable 3. Serious adverse events by treatment group (safety population, N = 92)

eTable 4. Reasons for exclusion from the modified intention-to-treat population by treatment group

**eMethods 1. Complete participant eligibility criteria**

**Inclusion criteria**

- Adults of either sex aged 18 years or older.
- Patients undergoing an episode of *Clostridioides difficile* infection (either the first episode or subsequent recurrences).
- Presence of diarrhea, defined as 3 or more unformed stools per 24 hours, at the beginning of the episode.
- Confirmation of the presence of *Clostridioides difficile* toxin A and/or B in feces, either by a direct toxin detection test or by polymerase chain reaction (PCR) for toxin-producing genes, at the start of the episode to be treated in the clinical trial; the test had to be positive within 7 days before enrollment.

**Exclusion criteria**

- Previous fecal microbiota transplantation.
- Transplanted patients, except those with a solid organ transplant performed more than 2 years previously and with good organ function.
- Absolute neutrophil count less than 500 cells/μL at the time of enrollment.
- Pregnancy, breastfeeding, or intention to become pregnant during the study.
- Active treatment with bile acid sequestrants.
- Human immunodeficiency virus infection, except in patients with CD4 T-lymphocyte counts greater than 200 cells/μL and viral load less than 20 copies/mL.
- Swallowing dysfunction or impaired oral motor coordination.
- Current admission to an intensive care unit or expected admission to an intensive care unit because of serious illness.
- Documented active inflammatory bowel disease.
- History of significant medical conditions that would not allow adequate evaluation or follow-up.
- PCR-positive stool without active diarrhea at the time of randomization.

**eMethods 2. Prohibited medications and major protocol deviations**

The study protocol prespecified restrictions on the use of concomitant systemic antibiotics during the 8-week follow-up period after randomization. Systemic antibacterial agents with activity against the intestinal anaerobic microbiota were considered prohibited medications, unless their use was required for life-threatening infections or for clearly unrelated clinical conditions, as determined by the treating investigator.

Use of prohibited antibiotics during follow-up was classified as a major protocol deviation and led to exclusion from the modified intention-to-treat population. Other prespecified major protocol deviations included absence of any postbaseline assessment of recurrence status, premature discontinuation of the assigned treatment, death before outcome assessment, and investigator-determined discontinuation due to intercurrent clinical decisions.

Definitions of prohibited medications and major protocol deviations were specified in the statistical analysis plan before database lock.

**eResults 1. Quality of life (SF-36)**

Quality of life was assessed using the SF-36 questionnaire at baseline and at week 8. Both treatment groups showed improvements in selected domains over follow-up, particularly in bodily pain and physical role functioning. No clinically meaningful differences between treatment groups were observed in any SF-36 domain at week 8.

**eTable 1. Stool donor inclusion criteria for MBK-01 manufacture**

| **Inclusion criteria** |
| --- |
| Age 18-50 years |
| Body mass index 18-30 kg/m² |
| Ability to donate 2 to 5 times per week |
| Good overall health |

**eTable 2. Stool donor exclusion criteria for MBK-01 manufacture**

| **Exclusion criteria** |
| --- |
| **Infectious risk factors** |
| History of infection or exposure to HIV, hepatitis B, hepatitis C, syphilis, primate T-lymphotropic viruses, malaria, or tuberculosis |
| At-risk sexual contacts or behaviors, or partner change, within the past 3 months |
| Sexual contact within the past 12 months with someone who has used needles for nonprescribed drugs, steroids, or other substances |
| Sexual contact within the past 12 months with someone with HIV, hepatitis B, hepatitis C, hemophilia, or receipt of clotting factor concentrates, or close contact with someone with hepatitis |
| Infection or treatment for any sexually transmitted disease within the past 12 months |
| Illicit drug use within the past 3 months |
| Previous organ or tissue transplantation |
| Contact within the past 6 months with another person's blood, or puncture/cut with material potentially contaminated with another person's blood or bodily fluids |
| Tattoos, piercings, acupuncture, or accidental needle stick within the past 12 months |
| Risk factors for Creutzfeldt-Jakob disease |
| Recent gastrointestinal infection (eg, rotavirus or Giardia lamblia) |
| Travel within the past 12 months to tropical countries with endemic diarrheal illnesses or high risk of traveler's diarrhea |
| Vaccination with a live attenuated vaccine or other injectable vaccine within the past 12 months |
| Work in hospitals or healthcare institutions (risk of multidrug-resistant organism transmission) or work with animals (risk of zoonotic transmission) |
| Imprisonment, residence in a correctional facility, or arrest for more than 72 hours within the past 12 months |
| History of malaria, Chagas disease, babesiosis, or trypanosomiasis |
| Personal history of COVID-19 or close household exposure to COVID-19 |
| Exposure to or infection with mpox virus |
| Fever, frequent cough, or shortness of breath within the past 2 weeks |
| **Gastrointestinal comorbidities** |
| Inflammatory bowel disease |
| Irritable bowel syndrome, chronic functional constipation, or chronic functional diarrhea (per Rome IV) |
| Celiac disease or other chronic digestive disorders |
| History of gastrointestinal cancer, polyposis, or high risk for gastrointestinal cancer |
| Family history of Crohn disease or ulcerative colitis (parents, siblings, or children) |
| Family history of colon cancer (parents, siblings, or children) |
| Diarrhea, blood in stool, abdominal pain, or other clinically significant gastrointestinal symptoms within the past 3 months or on a recurrent basis |
| **Medications that may alter gut microbiota** |
| Use of antibiotics, antifungals, or antivirals within the past 3 months |
| Use of proton pump inhibitors within the past 3 months |
| Use of systemic anticancer agents within the past 3 months |
| Use of medications for gastric reflux or heartburn within the past 3 months |
| Use of immunosuppressive medication or chemotherapy within the past 3 months |
| **Other reasons** |
| Legal inability to provide consent |
| Active cancer or history of cancer within the past 10 years |
| Alcohol consumption greater than 28 standard drink units per week |
| Any surgery within the past 3 months |
| Gastroscopy or colonoscopy within the past 3 months |
| Prior major digestive system surgery (excluding appendectomy) |
| Any transplant within the past 12 months |
| Advanced liver disease |
| Chronic kidney disease |
| Autoimmune or systemic diseases |
| Chronic or autoimmune systemic diseases with gastrointestinal involvement |
| Diabetes mellitus |
| Metabolic syndrome |
| Neurological, neurodegenerative, or psychiatric disease |
| Symptoms of eczema or psoriasis within the past 8 weeks |
| Food, seasonal, animal, medication, latex, dust, or other allergies |
| Asthma within the past 12 months |
| Symptoms of, or treatment for, attention deficit, hyperactivity, anxiety, and/or depression within the past 12 months |
| Pregnancy, delivery, or termination of pregnancy within the past 6 months |
| Vaccinations not received according to the routine vaccine schedule |
| Clinically significant vascular disease |

**eTable 3. Serious adverse events by treatment group (safety population, N = 92)**

| **Serious adverse event (MedDRA preferred term)** | **MBK-01, No. of events** | **Fidaxomicin, No. of events** | **Relationship** |
| --- | --- | --- | --- |
| Acute respiratory failure/distress | 1 | 1 | Not related |
| Acute pyelonephritis | 1 | 0 | Not related |
| Anal abscess | 1 | 0 | Not related |
| Heart failure | 1 | 0 | Not related |
| *Clostridioides difficile* infection (SAE-level event) ‡ | 1 | 1 | Not related |
| Diarrhea (SAE-level event) | 0 | 1 | Not related |
| Inflammatory bowel disease (new diagnosis) § | 0 | 1 | Not related |
| Intra-abdominal fluid collection | 1 | 0 | Not related |
| Necrotizing fasciitis | 1 | 0 | Not related |
| Pneumonia (cause of death) §§ | 0 | 1 | Not related |
| Rectal hemorrhage | 0 | 1 | Not related |
| Renal cancer | 1 | 0 | Not related |
| Sepsis (cause of death) §§ | 1 | 0 | Not related |
| Ulcerative colitis (new diagnosis) § | 1 | 0 | Not related |
| Total serious adverse events, No. | 11 | 5 | Not applicable |
| Patients with ≥1 serious adverse event, No. (%) | 9 (20) | 4 (9) | Not applicable |

Abbreviations: MedDRA, Medical Dictionary for Regulatory Activities; SAE, serious adverse event. ‡ Episodes of *Clostridioides difficile* infection that met serious adverse event criteria (hospitalization or prolongation of hospitalization) but were not attributed to study treatment. § Patients had compatible symptoms at study entry; the diagnoses were considered independent of assigned treatment. §§ The 2 deaths (sepsis in the MBK-01 group and community-acquired pneumonia in the fidaxomicin group) were not related to *Clostridioides difficile* infection or to study treatment.

**eTable 4. Reasons for exclusion from the modified intention-to-treat population by treatment group**

| **Reason for exclusion** | **MBK-01 (n = 45)** | **Fidaxomicin (n = 47)** |
| --- | --- | --- |
| Use of prohibited systemic antibiotics during follow-up | 5 | 4 |
| Adverse events leading to early discontinuation without postbaseline outcome assessment | 1 | 1 |
| Death before primary outcome assessment | 1 | 1 |
| No postbaseline assessment of recurrence status (lost to follow-up / early withdrawal) | 1 | 1 |
| Administrative or logistical reasons | 0 | 0 |
| Other major protocol deviations | 0 | 0 |
| Total excluded from mITT population | 8 | 7 |

Reasons for exclusion were not mutually exclusive. Major protocol deviations were prespecified in the statistical analysis plan before database lock. Exclusions were balanced between treatment groups.
